# Supplementary material
Source: publisher site journal article supplement (https://www.dovepress.com/get_supplementary_file.php?f=219699d.xlsx)
Supplement: Supplementary file 1 [file get_supplementary_file.php]

## Sheet: CTC KEGG
#pathway ID	pathway description	observed gene count	false discovery rate	matching proteins in your network (IDs)	matching proteins in your network (labels)
hsa05205	Proteoglycans in cancer	12	4.21e-08	ENSP00000221930,ENSP00000242261,ENSP00000267101,ENSP00000269571,ENSP00000275493,ENSP00000286827,ENSP00000296181,ENSP00000317272,ENSP00000361850,ENSP00000375892,ENSP00000398632,ENSP00000479618	AKT2,CD44,EGFR,ERBB2,ERBB3,ITGB5,MET,MYC,PLAU,TGFB1,TIAM1,TWIST1
hsa05206	MicroRNAs in cancer	11	4.21e-08	ENSP00000257290,ENSP00000267101,ENSP00000269571,ENSP00000275493,ENSP00000317272,ENSP00000361850,ENSP00000372221,ENSP00000398632,ENSP00000446007,ENSP00000454157,ENSP00000479618	CD44,EGFR,ERBB2,ERBB3,MET,MYC,PDGFRA,PLAU,SERPINB5,VIM,ZEB2
hsa05226	Gastric cancer	8	4.01e-05	ENSP00000221930,ENSP00000269571,ENSP00000275493,ENSP00000317272,ENSP00000346158,ENSP00000368169,ENSP00000375892,ENSP00000479618	AKT2,DVL1,EGFR,ERBB2,MET,MYC,REG4,TGFB1
hsa05230	Central carbon metabolism in cancer	6	4.44e-05	ENSP00000257290,ENSP00000269571,ENSP00000275493,ENSP00000317272,ENSP00000375892,ENSP00000479618	AKT2,EGFR,ERBB2,MET,MYC,PDGFRA
hsa01521	EGFR tyrosine kinase inhibitor resistance	6	9.61e-05	ENSP00000257290,ENSP00000267101,ENSP00000269571,ENSP00000275493,ENSP00000317272,ENSP00000375892	AKT2,EGFR,ERBB2,ERBB3,MET,PDGFRA
hsa04510	Focal adhesion	8	0.00016	ENSP00000211998,ENSP00000257290,ENSP00000269571,ENSP00000275493,ENSP00000296181,ENSP00000316029,ENSP00000317272,ENSP00000375892	AKT2,EGFR,ERBB2,ITGB5,MET,PDGFRA,TLN1,VCL
hsa05215	Prostate cancer	6	0.00022	ENSP00000257290,ENSP00000269571,ENSP00000275493,ENSP00000314151,ENSP00000361850,ENSP00000375892	AKT2,EGFR,ERBB2,KLK3,PDGFRA,PLAU
hsa04010	MAPK signaling pathway	9	0.00027	ENSP00000221930,ENSP00000257290,ENSP00000267101,ENSP00000269571,ENSP00000275493,ENSP00000317272,ENSP00000351209,ENSP00000375892,ENSP00000479618	AKT2,EGFR,EPHA2,ERBB2,ERBB3,MET,MYC,PDGFRA,TGFB1
hsa05166	HTLV-I infection	8	0.00057	ENSP00000221930,ENSP00000257290,ENSP00000316029,ENSP00000341483,ENSP00000368169,ENSP00000375892,ENSP00000377536,ENSP00000479618	AKT2,DVL1,MYC,PDGFRA,PTTG1,RANBP3,TGFB1,TLN1
hsa05200	Pathways in cancer	11	0.00064	ENSP00000221930,ENSP00000245451,ENSP00000249749,ENSP00000257290,ENSP00000269571,ENSP00000275493,ENSP00000314151,ENSP00000317272,ENSP00000368169,ENSP00000375892,ENSP00000479618	AKT2,BMP4,DLL4,DVL1,EGFR,ERBB2,KLK3,MET,MYC,PDGFRA,TGFB1
hsa04151	PI3K-Akt signaling pathway	9	0.00074	ENSP00000257290,ENSP00000267101,ENSP00000269571,ENSP00000275493,ENSP00000296181,ENSP00000317272,ENSP00000351209,ENSP00000375892,ENSP00000479618	AKT2,EGFR,EPHA2,ERBB2,ERBB3,ITGB5,MET,MYC,PDGFRA
hsa04012	ErbB signaling pathway	5	0.00085	ENSP00000267101,ENSP00000269571,ENSP00000275493,ENSP00000375892,ENSP00000479618	AKT2,EGFR,ERBB2,ERBB3,MYC
hsa04015	Rap1 signaling pathway	7	0.00085	ENSP00000257290,ENSP00000275493,ENSP00000286827,ENSP00000316029,ENSP00000317272,ENSP00000351209,ENSP00000375892	AKT2,EGFR,EPHA2,MET,PDGFRA,TIAM1,TLN1
hsa05224	Breast cancer	6	0.001	ENSP00000249749,ENSP00000269571,ENSP00000275493,ENSP00000368169,ENSP00000375892,ENSP00000479618	AKT2,DLL4,DVL1,EGFR,ERBB2,MYC
hsa05225	Hepatocellular carcinoma	6	0.0017	ENSP00000221930,ENSP00000275493,ENSP00000317272,ENSP00000368169,ENSP00000375892,ENSP00000479618	AKT2,DVL1,EGFR,MET,MYC,TGFB1
hsa05213	Endometrial cancer	4	0.0022	ENSP00000269571,ENSP00000275493,ENSP00000375892,ENSP00000479618	AKT2,EGFR,ERBB2,MYC
hsa04520	Adherens junction	4	0.0043	ENSP00000211998,ENSP00000269571,ENSP00000275493,ENSP00000317272	EGFR,ERBB2,MET,VCL
hsa05218	Melanoma	4	0.0043	ENSP00000257290,ENSP00000275493,ENSP00000317272,ENSP00000375892	AKT2,EGFR,MET,PDGFRA
hsa05212	Pancreatic cancer	4	0.0045	ENSP00000221930,ENSP00000269571,ENSP00000275493,ENSP00000375892	AKT2,EGFR,ERBB2,TGFB1
hsa04350	TGF-beta signaling pathway	4	0.0065	ENSP00000221930,ENSP00000245451,ENSP00000283147,ENSP00000479618	BMP4,BMP6,MYC,TGFB1
hsa04014	Ras signaling pathway	6	0.0067	ENSP00000257290,ENSP00000275493,ENSP00000286827,ENSP00000317272,ENSP00000351209,ENSP00000375892	AKT2,EGFR,EPHA2,MET,PDGFRA,TIAM1
hsa04390	Hippo signaling pathway	5	0.0067	ENSP00000221930,ENSP00000245451,ENSP00000283147,ENSP00000368169,ENSP00000479618	BMP4,BMP6,DVL1,MYC,TGFB1
hsa05210	Colorectal cancer	4	0.0067	ENSP00000221930,ENSP00000275493,ENSP00000375892,ENSP00000479618	AKT2,EGFR,MYC,TGFB1
hsa05219	Bladder cancer	3	0.0082	ENSP00000269571,ENSP00000275493,ENSP00000479618	EGFR,ERBB2,MYC
hsa01522	Endocrine resistance	4	0.0084	ENSP00000249749,ENSP00000269571,ENSP00000275493,ENSP00000375892	AKT2,DLL4,EGFR,ERBB2
hsa04066	HIF-1 signaling pathway	4	0.009	ENSP00000218388,ENSP00000269571,ENSP00000275493,ENSP00000375892	AKT2,EGFR,ERBB2,TIMP1
hsa04810	Regulation of actin cytoskeleton	5	0.0199	ENSP00000211998,ENSP00000257290,ENSP00000275493,ENSP00000286827,ENSP00000296181	EGFR,ITGB5,PDGFRA,TIAM1,VCL
hsa04926	Relaxin signaling pathway	4	0.0225	ENSP00000221930,ENSP00000260302,ENSP00000275493,ENSP00000375892	AKT2,EGFR,MMP13,TGFB1
hsa04915	Estrogen signaling pathway	4	0.0235	ENSP00000167588,ENSP00000275493,ENSP00000355124,ENSP00000375892	AKT2,EGFR,KRT19,KRT20
hsa05223	Non-small cell lung cancer	3	0.0239	ENSP00000269571,ENSP00000275493,ENSP00000375892	AKT2,EGFR,ERBB2
hsa04550	Signaling pathways regulating pluripotency of stem cells	4	0.025	ENSP00000245451,ENSP00000368169,ENSP00000375892,ENSP00000479618	AKT2,BMP4,DVL1,MYC
hsa05211	Renal cell carcinoma	3	0.025	ENSP00000221930,ENSP00000317272,ENSP00000375892	AKT2,MET,TGFB1
hsa05214	Glioma	3	0.025	ENSP00000257290,ENSP00000275493,ENSP00000375892	AKT2,EGFR,PDGFRA
hsa05220	Chronic myeloid leukemia	3	0.0307	ENSP00000221930,ENSP00000375892,ENSP00000479618	AKT2,MYC,TGFB1
hsa04512	ECM-receptor interaction	3	0.0353	ENSP00000296181,ENSP00000355361,ENSP00000398632	CD44,CD47,ITGB5
hsa04630	Jak-STAT signaling pathway	4	0.0356	ENSP00000257290,ENSP00000275493,ENSP00000375892,ENSP00000479618	AKT2,EGFR,MYC,PDGFRA
hsa05202	Transcriptional misregulation in cancer	4	0.0416	ENSP00000317272,ENSP00000361850,ENSP00000426809,ENSP00000479618	MET,MYC,PLAU,PROM1
hsa04020	Calcium signaling pathway	4	0.049	ENSP00000257290,ENSP00000267101,ENSP00000269571,ENSP00000275493	EGFR,ERBB2,ERBB3,PDGFRA

## Sheet: CTC reactom
#pathway ID	pathway description	observed gene count	false discovery rate	matching proteins in your network (IDs)	matching proteins in your network (labels)
HSA-109582	Hemostasis	13	0.0013	ENSP00000211998,ENSP00000218388,ENSP00000221930,ENSP00000221992,ENSP00000263735,ENSP00000284981,ENSP00000315130,ENSP00000316029,ENSP00000355361,ENSP00000361850,ENSP00000371958,ENSP00000385706,ENSP00000398632	APP,CD44,CD47,CD9,CEACAM5,CLU,EPCAM,PLAU,PSG2,TGFB1,TIMP1,TLN1,VCL
HSA-114608	Platelet degranulation	7	0.0013	ENSP00000211998,ENSP00000218388,ENSP00000221930,ENSP00000284981,ENSP00000315130,ENSP00000316029,ENSP00000371958	APP,CD9,CLU,TGFB1,TIMP1,TLN1,VCL
HSA-1474244	Extracellular matrix organization	9	0.0013	ENSP00000218388,ENSP00000221930,ENSP00000245451,ENSP00000260302,ENSP00000264094,ENSP00000284981,ENSP00000296181,ENSP00000355361,ENSP00000398632	APP,BMP4,CD44,CD47,ITGB5,LOXL3,MMP13,TGFB1,TIMP1
HSA-1643685	Disease	17	0.0013	ENSP00000211998,ENSP00000221930,ENSP00000249749,ENSP00000257290,ENSP00000269571,ENSP00000275493,ENSP00000284981,ENSP00000307297,ENSP00000316029,ENSP00000317272,ENSP00000345873,ENSP00000364150,ENSP00000371958,ENSP00000375892,ENSP00000479618,ENSP00000484824,ENSP00000485028	AKT2,APP,CD9,CHST14,DLL4,EGFR,ERBB2,GALNT12,MET,MUC1,MUC13,MYC,PDGFRA,SLC26A3,TGFB1,TLN1,VCL
HSA-5663202	Diseases of signal transduction	10	0.0013	ENSP00000211998,ENSP00000221930,ENSP00000249749,ENSP00000257290,ENSP00000269571,ENSP00000275493,ENSP00000316029,ENSP00000317272,ENSP00000375892,ENSP00000479618	AKT2,DLL4,EGFR,ERBB2,MET,MYC,PDGFRA,TGFB1,TLN1,VCL
HSA-6785807	Interleukin-4 and Interleukin-13 signaling	6	0.0013	ENSP00000218388,ENSP00000221930,ENSP00000242261,ENSP00000446007,ENSP00000479618,ENSP00000484824	MUC1,MYC,TGFB1,TIMP1,TWIST1,VIM
HSA-202733	Cell surface interactions at the vascular wall	6	0.003	ENSP00000221930,ENSP00000221992,ENSP00000263735,ENSP00000355361,ENSP00000385706,ENSP00000398632	CD44,CD47,CEACAM5,EPCAM,PSG2,TGFB1
HSA-2219528	PI3K/AKT Signaling in Cancer	5	0.0033	ENSP00000257290,ENSP00000269571,ENSP00000275493,ENSP00000317272,ENSP00000375892	AKT2,EGFR,ERBB2,MET,PDGFRA
HSA-1566948	Elastic fibre formation	4	0.0034	ENSP00000221930,ENSP00000245451,ENSP00000264094,ENSP00000296181	BMP4,ITGB5,LOXL3,TGFB1
HSA-199418	Negative regulation of the PI3K/AKT network	5	0.0037	ENSP00000257290,ENSP00000269571,ENSP00000275493,ENSP00000317272,ENSP00000375892	AKT2,EGFR,ERBB2,MET,PDGFRA
HSA-5083636	Defective GALNT12 causes colorectal cancer 1 (CRCS1)	3	0.0037	ENSP00000364150,ENSP00000484824,ENSP00000485028	GALNT12,MUC1,MUC13
HSA-2219530	Constitutive Signaling by Aberrant PI3K in Cancer	4	0.0071	ENSP00000257290,ENSP00000269571,ENSP00000275493,ENSP00000317272	EGFR,ERBB2,MET,PDGFRA
HSA-1251932	PLCG1 events in ERBB2 signaling	2	0.0095	ENSP00000269571,ENSP00000275493	EGFR,ERBB2
HSA-5683057	MAPK family signaling cascades	7	0.01	ENSP00000211998,ENSP00000257290,ENSP00000269571,ENSP00000275493,ENSP00000316029,ENSP00000317272,ENSP00000479618	EGFR,ERBB2,MET,MYC,PDGFRA,TLN1,VCL
HSA-8863795	Downregulation of ERBB2 signaling	3	0.01	ENSP00000269571,ENSP00000275493,ENSP00000375892	AKT2,EGFR,ERBB2
HSA-445355	Smooth Muscle Contraction	3	0.0145	ENSP00000211998,ENSP00000296181,ENSP00000316029	ITGB5,TLN1,VCL
HSA-8864260	Transcriptional regulation by the AP-2 (TFAP2) family of transcription factors	3	0.0162	ENSP00000269571,ENSP00000275493,ENSP00000479618	EGFR,ERBB2,MYC
HSA-8941332	RUNX2 regulates genes involved in cell migration	2	0.0169	ENSP00000260302,ENSP00000375892	AKT2,MMP13
HSA-2129379	Molecules associated with elastic fibres	3	0.0174	ENSP00000221930,ENSP00000245451,ENSP00000296181	BMP4,ITGB5,TGFB1
HSA-5673001	RAF/MAP kinase cascade	6	0.0174	ENSP00000211998,ENSP00000257290,ENSP00000269571,ENSP00000275493,ENSP00000316029,ENSP00000317272	EGFR,ERBB2,MET,PDGFRA,TLN1,VCL
HSA-6811558	PI5P, PP2A and IER3 Regulate PI3K/AKT Signaling	4	0.0174	ENSP00000257290,ENSP00000269571,ENSP00000275493,ENSP00000317272	EGFR,ERBB2,MET,PDGFRA
HSA-446388	Regulation of cytoskeletal remodeling and cell spreading by IPP complex components	2	0.0176	ENSP00000367154,ENSP00000446121	LIMS1,RSU1
HSA-5684996	MAPK1/MAPK3 signaling	6	0.0176	ENSP00000211998,ENSP00000257290,ENSP00000269571,ENSP00000275493,ENSP00000316029,ENSP00000317272	EGFR,ERBB2,MET,PDGFRA,TLN1,VCL
HSA-1266738	Developmental Biology	13	0.0193	ENSP00000167588,ENSP00000221930,ENSP00000229922,ENSP00000269571,ENSP00000275493,ENSP00000286827,ENSP00000316029,ENSP00000317272,ENSP00000331678,ENSP00000351209,ENSP00000355124,ENSP00000375892,ENSP00000449404	AKT2,CAP2,EGFR,EPHA2,ERBB2,KRT19,KRT20,KRT8,MET,PKP3,TGFB1,TIAM1,TLN1
HSA-449147	Signaling by Interleukins	8	0.0203	ENSP00000218388,ENSP00000221930,ENSP00000242261,ENSP00000284981,ENSP00000345347,ENSP00000446007,ENSP00000479618,ENSP00000484824	APP,HMGB1,MUC1,MYC,TGFB1,TIMP1,TWIST1,VIM
HSA-1227986	Signaling by ERBB2	3	0.0259	ENSP00000269571,ENSP00000275493,ENSP00000375892	AKT2,EGFR,ERBB2
HSA-168256	Immune System	19	0.0259	ENSP00000211998,ENSP00000218388,ENSP00000219022,ENSP00000221930,ENSP00000242261,ENSP00000284981,ENSP00000296181,ENSP00000315130,ENSP00000345347,ENSP00000348838,ENSP00000355361,ENSP00000361850,ENSP00000375892,ENSP00000398632,ENSP00000411613,ENSP00000446007,ENSP00000479618,ENSP00000484824,ENSP00000485028	AKT2,AOC1,APP,CD44,CD47,CLU,HMGB1,ITGB5,MUC1,MUC13,MYC,OLFM4,PLAU,TGFB1,TIMP1,TWIST1,UBE2C,VCL,VIM
HSA-8847993	ERBB2 Activates PTK6 Signaling	2	0.0259	ENSP00000269571,ENSP00000275493	EGFR,ERBB2
HSA-8866910	TFAP2 (AP-2) family regulates transcription of growth factors and their receptors	2	0.0259	ENSP00000269571,ENSP00000275493	EGFR,ERBB2
HSA-1358803	Downregulation of ERBB2:ERBB3 signaling	2	0.0263	ENSP00000269571,ENSP00000375892	AKT2,ERBB2
HSA-1963642	PI3K events in ERBB2 signaling	2	0.0294	ENSP00000269571,ENSP00000275493	EGFR,ERBB2
HSA-6785631	ERBB2 Regulates Cell Motility	2	0.0294	ENSP00000269571,ENSP00000275493	EGFR,ERBB2
HSA-879415	Advanced glycosylation endproduct receptor signaling	2	0.0294	ENSP00000284981,ENSP00000345347	APP,HMGB1
HSA-1963640	GRB2 events in ERBB2 signaling	2	0.0307	ENSP00000269571,ENSP00000275493	EGFR,ERBB2
HSA-381426	Regulation of Insulin-like Growth Factor (IGF) transport and uptake by Insulin-like Growth Factor Binding Proteins (IGFBPs)	4	0.0365	ENSP00000218388,ENSP00000245451,ENSP00000284981,ENSP00000314151	APP,BMP4,KLK3,TIMP1
HSA-5083625	Defective GALNT3 causes familial hyperphosphatemic tumoral calcinosis (HFTC)	2	0.0368	ENSP00000484824,ENSP00000485028	MUC1,MUC13
HSA-5083632	Defective C1GALT1C1 causes Tn polyagglutination syndrome (TNPS)	2	0.0368	ENSP00000484824,ENSP00000485028	MUC1,MUC13
HSA-913709	O-linked glycosylation of mucins	3	0.0368	ENSP00000364150,ENSP00000484824,ENSP00000485028	GALNT12,MUC1,MUC13
HSA-6809371	Formation of the cornified envelope	4	0.0378	ENSP00000167588,ENSP00000331678,ENSP00000355124,ENSP00000449404	KRT19,KRT20,KRT8,PKP3
HSA-1280215	Cytokine Signaling in Immune system	9	0.0408	ENSP00000218388,ENSP00000221930,ENSP00000242261,ENSP00000284981,ENSP00000345347,ENSP00000398632,ENSP00000446007,ENSP00000479618,ENSP00000484824	APP,CD44,HMGB1,MUC1,MYC,TGFB1,TIMP1,TWIST1,VIM
HSA-373755	Semaphorin interactions	3	0.0408	ENSP00000269571,ENSP00000316029,ENSP00000317272	ERBB2,MET,TLN1
HSA-1250196	SHC1 events in ERBB2 signaling	2	0.0414	ENSP00000269571,ENSP00000275493	EGFR,ERBB2
HSA-3781865	Diseases of glycosylation	4	0.0414	ENSP00000307297,ENSP00000364150,ENSP00000484824,ENSP00000485028	CHST14,GALNT12,MUC1,MUC13

## Sheet: CTC cellular compnent
#pathway ID	pathway description	observed gene count	false discovery rate	matching proteins in your network (IDs)	matching proteins in your network (labels)
GO:0005615	extracellular space	26	5.11e-09	ENSP00000218388,ENSP00000219022,ENSP00000221930,ENSP00000244930,ENSP00000245451,ENSP00000260302,ENSP00000264094,ENSP00000267101,ENSP00000275493,ENSP00000283147,ENSP00000284981,ENSP00000302100,ENSP00000314151,ENSP00000315130,ENSP00000329137,ENSP00000345347,ENSP00000355361,ENSP00000361850,ENSP00000371958,ENSP00000372221,ENSP00000391490,ENSP00000411613,ENSP00000426809,ENSP00000430690,ENSP00000484824…	AGR2,AOC1,APP,BMP4,BMP6,CD47,CD9,CLU,EGFR,ERBB3,FAM132A,HMGB1,KLK3,LGALS4,LOXL3,MMP13,MUC1,MUC13,OLFM4,PLAU,PROM1,SCGB2A1,SERPINB5,TFF3,TGFB1,TIMP1
GO:0005576	extracellular region	37	1.34e-08	ENSP00000006724,ENSP00000161006,ENSP00000211998,ENSP00000218388,ENSP00000219022,ENSP00000221930,ENSP00000221992,ENSP00000244930,ENSP00000245451,ENSP00000260302,ENSP00000264094,ENSP00000267101,ENSP00000275493,ENSP00000283147,ENSP00000284981,ENSP00000302100,ENSP00000314151,ENSP00000315130,ENSP00000316029,ENSP00000317272,ENSP00000329137,ENSP00000345347,ENSP00000346158,ENSP00000349493,ENSP00000351632…	AGR2,AOC1,APP,BMP4,BMP6,CD47,CD9,CEACAM5,CEACAM7,CLU,EGFR,ERBB3,FAM132A,FAM172A,FAM3D,GUCA2A,HMGB1,KLK3,LGALS4,LOXL3,MET,MMP13,MUC1,MUC13,OLFM4,PLAU,PROM1,PRSS22,PSG2,REG4,SCGB2A1,SERPINB5,TFF3,TGFB1,TIMP1,TLN1,VCL
GO:0045177	apical part of cell	15	4.18e-08	ENSP00000006724,ENSP00000221992,ENSP00000263735,ENSP00000267101,ENSP00000269571,ENSP00000275493,ENSP00000284981,ENSP00000293599,ENSP00000295834,ENSP00000345873,ENSP00000371958,ENSP00000398632,ENSP00000426809,ENSP00000484824,ENSP00000485028	APP,AQP5,CD44,CD9,CEACAM5,CEACAM7,EGFR,EPCAM,ERBB2,ERBB3,FABP1,MUC1,MUC13,PROM1,SLC26A3
GO:0098590	plasma membrane region	23	7.28e-08	ENSP00000006724,ENSP00000221992,ENSP00000263735,ENSP00000267101,ENSP00000269571,ENSP00000275493,ENSP00000286827,ENSP00000293599,ENSP00000301945,ENSP00000304290,ENSP00000316029,ENSP00000317272,ENSP00000345873,ENSP00000351209,ENSP00000355124,ENSP00000371958,ENSP00000375892,ENSP00000376457,ENSP00000398632,ENSP00000426809,ENSP00000449404,ENSP00000484824,ENSP00000485028	AKT2,ANTXR1,AQP5,CD44,CD9,CEACAM5,CEACAM7,CHRNB1,ECT2,EGFR,EPCAM,EPHA2,ERBB2,ERBB3,KRT19,KRT8,MET,MUC1,MUC13,PROM1,SLC26A3,TIAM1,TLN1
GO:0016324	apical plasma membrane	13	2.1e-07	ENSP00000006724,ENSP00000221992,ENSP00000263735,ENSP00000267101,ENSP00000269571,ENSP00000275493,ENSP00000293599,ENSP00000345873,ENSP00000371958,ENSP00000398632,ENSP00000426809,ENSP00000484824,ENSP00000485028	AQP5,CD44,CD9,CEACAM5,CEACAM7,EGFR,EPCAM,ERBB2,ERBB3,MUC1,MUC13,PROM1,SLC26A3
GO:0044459	plasma membrane part	35	3.19e-07	ENSP00000006724,ENSP00000161006,ENSP00000221992,ENSP00000255448,ENSP00000257290,ENSP00000258080,ENSP00000263735,ENSP00000266674,ENSP00000267101,ENSP00000269571,ENSP00000275493,ENSP00000284981,ENSP00000286827,ENSP00000293599,ENSP00000296181,ENSP00000301945,ENSP00000304290,ENSP00000316029,ENSP00000317272,ENSP00000345347,ENSP00000345873,ENSP00000351209,ENSP00000355124,ENSP00000355361,ENSP00000356842…	ADORA3,AKT2,ANTXR1,APP,AQP5,CD44,CD47,CD9,CEACAM5,CEACAM7,CHRNB1,DCLK1,ECT2,EGFR,EPCAM,EPHA2,ERBB2,ERBB3,GPA33,HMGB1,HTRA2,ITGB5,KRT19,KRT8,LGR5,MET,MUC1,MUC13,PDGFRA,PROM1,PRSS22,SLC26A3,TIAM1,TLN1,TSPAN8
GO:0071944	cell periphery	51	5.42e-07	ENSP00000006724,ENSP00000161006,ENSP00000211998,ENSP00000219022,ENSP00000221930,ENSP00000221992,ENSP00000229922,ENSP00000248444,ENSP00000249749,ENSP00000255448,ENSP00000257290,ENSP00000258080,ENSP00000263735,ENSP00000266674,ENSP00000267101,ENSP00000269571,ENSP00000275493,ENSP00000284981,ENSP00000286827,ENSP00000293599,ENSP00000295834,ENSP00000296181,ENSP00000301945,ENSP00000302100,ENSP00000304290…	ADORA3,AKT2,ANTXR1,AOC1,APP,AQP5,CAP2,CD44,CD47,CD9,CEACAM5,CEACAM7,CHRNB1,DCLK1,DLL4,DVL1,ECT2,EGFR,EPCAM,EPHA2,ERBB2,ERBB3,FABP1,GPA33,HMGB1,HTRA2,ITGB5,KRT19,KRT8,LGALS4,LGR5,LIMS1,MET,MUC1,MUC13,OLFM4,PDGFRA,PKP3,PLAU,PLS3,PROM1,PRSS22,SLC26A3,TGFB1,TIAM1,TLN1,TSPAN8,UBE2C,VCL,VIL1,VIM
GO:0005886	plasma membrane	50	8.34e-07	ENSP00000006724,ENSP00000161006,ENSP00000211998,ENSP00000219022,ENSP00000221930,ENSP00000221992,ENSP00000229922,ENSP00000248444,ENSP00000249749,ENSP00000255448,ENSP00000257290,ENSP00000258080,ENSP00000263735,ENSP00000266674,ENSP00000267101,ENSP00000269571,ENSP00000275493,ENSP00000284981,ENSP00000286827,ENSP00000293599,ENSP00000296181,ENSP00000301945,ENSP00000302100,ENSP00000304290,ENSP00000316029…	ADORA3,AKT2,ANTXR1,AOC1,APP,AQP5,CAP2,CD44,CD47,CD9,CEACAM5,CEACAM7,CHRNB1,DCLK1,DLL4,DVL1,ECT2,EGFR,EPCAM,EPHA2,ERBB2,ERBB3,GPA33,HMGB1,HTRA2,ITGB5,KRT19,KRT8,LGALS4,LGR5,LIMS1,MET,MUC1,MUC13,OLFM4,PDGFRA,PKP3,PLAU,PLS3,PROM1,PRSS22,SLC26A3,TGFB1,TIAM1,TLN1,TSPAN8,UBE2C,VCL,VIL1,VIM
GO:0009986	cell surface	17	1.1e-06	ENSP00000221930,ENSP00000221992,ENSP00000257290,ENSP00000263735,ENSP00000275493,ENSP00000284981,ENSP00000296181,ENSP00000301945,ENSP00000315130,ENSP00000316029,ENSP00000345347,ENSP00000351209,ENSP00000361850,ENSP00000371958,ENSP00000377003,ENSP00000398632,ENSP00000426809	ANTXR1,APP,CD44,CD9,CEACAM5,CLU,EGFR,EPCAM,EPHA2,HMGB1,ITGB5,PDGFRA,PLAU,PROM1,TGFB1,TLN1,TSPAN8
GO:0031226	intrinsic component of plasma membrane	23	6.71e-05	ENSP00000161006,ENSP00000221992,ENSP00000255448,ENSP00000257290,ENSP00000258080,ENSP00000263735,ENSP00000266674,ENSP00000267101,ENSP00000284981,ENSP00000293599,ENSP00000296181,ENSP00000304290,ENSP00000317272,ENSP00000345873,ENSP00000351209,ENSP00000355361,ENSP00000356842,ENSP00000358730,ENSP00000371958,ENSP00000377003,ENSP00000398632,ENSP00000426809,ENSP00000484824	ADORA3,APP,AQP5,CD44,CD47,CD9,CEACAM5,CHRNB1,DCLK1,EPCAM,EPHA2,ERBB3,GPA33,HTRA2,ITGB5,LGR5,MET,MUC1,PDGFRA,PROM1,PRSS22,SLC26A3,TSPAN8
GO:0005887	integral component of plasma membrane	22	0.0001	ENSP00000221992,ENSP00000255448,ENSP00000257290,ENSP00000258080,ENSP00000263735,ENSP00000266674,ENSP00000267101,ENSP00000284981,ENSP00000293599,ENSP00000296181,ENSP00000304290,ENSP00000317272,ENSP00000345873,ENSP00000351209,ENSP00000355361,ENSP00000356842,ENSP00000358730,ENSP00000371958,ENSP00000377003,ENSP00000398632,ENSP00000426809,ENSP00000484824	ADORA3,APP,AQP5,CD44,CD47,CD9,CEACAM5,CHRNB1,DCLK1,EPCAM,EPHA2,ERBB3,GPA33,HTRA2,ITGB5,LGR5,MET,MUC1,PDGFRA,PROM1,SLC26A3,TSPAN8
GO:0031983	vesicle lumen	9	0.0011	ENSP00000211998,ENSP00000218388,ENSP00000219022,ENSP00000221930,ENSP00000275493,ENSP00000284981,ENSP00000315130,ENSP00000345347,ENSP00000411613	AOC1,APP,CLU,EGFR,HMGB1,OLFM4,TGFB1,TIMP1,VCL
GO:0098858	actin-based cell projection	7	0.0011	ENSP00000248444,ENSP00000257290,ENSP00000284981,ENSP00000293599,ENSP00000301945,ENSP00000398632,ENSP00000426809	ANTXR1,APP,AQP5,CD44,PDGFRA,PROM1,VIL1
GO:0070062	extracellular exosome	5	0.0012	ENSP00000355361,ENSP00000371958,ENSP00000411613,ENSP00000426809,ENSP00000484824	AOC1,CD47,CD9,MUC1,PROM1
GO:0005902	microvillus	5	0.0013	ENSP00000248444,ENSP00000257290,ENSP00000293599,ENSP00000398632,ENSP00000426809	AQP5,CD44,PDGFRA,PROM1,VIL1
GO:0016020	membrane	59	0.0013	ENSP00000006724,ENSP00000161006,ENSP00000211998,ENSP00000219022,ENSP00000221930,ENSP00000221992,ENSP00000229922,ENSP00000248444,ENSP00000249749,ENSP00000255448,ENSP00000257290,ENSP00000258080,ENSP00000263321,ENSP00000263735,ENSP00000264094,ENSP00000266674,ENSP00000267101,ENSP00000269571,ENSP00000275493,ENSP00000284981,ENSP00000286827,ENSP00000287600,ENSP00000293599,ENSP00000296181,ENSP00000301945…	ADORA3,AKT2,ANTXR1,AOC1,APP,AQP5,CAP2,CD44,CD47,CD9,CEACAM5,CEACAM7,CHRNB1,CHST14,CLU,DCLK1,DLL4,DVL1,ECT2,EGFR,EPCAM,EPHA2,ERBB2,ERBB3,GALNT12,GPA33,HMGB1,HTRA2,ITGB5,KRT19,KRT8,LGALS4,LGR5,LIMS1,LOXL3,MET,MUC1,MUC13,OLFM4,OSBP2,PDE6D,PDGFRA,PKP3,PLAU,PLS3,PROM1,PRSS22,SLC26A3,TGFB1,TIAM1,TLN1,TMEM69,TSPAN8,TYR,UBE2C,UGT1A9,VCL,VIL1,VIM
GO:0031252	cell leading edge	9	0.0015	ENSP00000248444,ENSP00000284981,ENSP00000286827,ENSP00000301945,ENSP00000316029,ENSP00000351209,ENSP00000375892,ENSP00000398632,ENSP00000446007	AKT2,ANTXR1,APP,CD44,EPHA2,TIAM1,TLN1,VIL1,VIM
GO:0016323	basolateral plasma membrane	7	0.0016	ENSP00000221992,ENSP00000263735,ENSP00000267101,ENSP00000269571,ENSP00000275493,ENSP00000293599,ENSP00000317272	AQP5,CEACAM5,EGFR,EPCAM,ERBB2,ERBB3,MET
GO:0031091	platelet alpha granule	5	0.0016	ENSP00000218388,ENSP00000221930,ENSP00000284981,ENSP00000315130,ENSP00000371958	APP,CD9,CLU,TGFB1,TIMP1
GO:0031256	leading edge membrane	6	0.0016	ENSP00000286827,ENSP00000301945,ENSP00000316029,ENSP00000351209,ENSP00000375892,ENSP00000398632	AKT2,ANTXR1,CD44,EPHA2,TIAM1,TLN1
GO:0043235	receptor complex	8	0.0018	ENSP00000258080,ENSP00000267101,ENSP00000269571,ENSP00000275493,ENSP00000284981,ENSP00000296181,ENSP00000304290,ENSP00000398632	APP,CD44,CHRNB1,EGFR,ERBB2,ERBB3,HTRA2,ITGB5
GO:0005911	cell-cell junction	9	0.002	ENSP00000211998,ENSP00000263735,ENSP00000284981,ENSP00000286827,ENSP00000331678,ENSP00000376457,ENSP00000411613,ENSP00000446121,ENSP00000449404	AOC1,APP,ECT2,EPCAM,KRT8,LIMS1,PKP3,TIAM1,VCL
GO:0031253	cell projection membrane	8	0.002	ENSP00000286827,ENSP00000301945,ENSP00000316029,ENSP00000345873,ENSP00000351209,ENSP00000375892,ENSP00000398632,ENSP00000426809	AKT2,ANTXR1,CD44,EPHA2,PROM1,SLC26A3,TIAM1,TLN1
GO:0043034	costamere	3	0.002	ENSP00000211998,ENSP00000355124,ENSP00000449404	KRT19,KRT8,VCL
GO:0031982	vesicle	24	0.0022	ENSP00000211998,ENSP00000218388,ENSP00000219022,ENSP00000221930,ENSP00000263321,ENSP00000269571,ENSP00000275493,ENSP00000283147,ENSP00000284981,ENSP00000287600,ENSP00000296181,ENSP00000301945,ENSP00000315130,ENSP00000345347,ENSP00000355361,ENSP00000361850,ENSP00000368169,ENSP00000371958,ENSP00000375892,ENSP00000398632,ENSP00000411613,ENSP00000426809,ENSP00000446007,ENSP00000484824	AKT2,ANTXR1,AOC1,APP,BMP6,CD44,CD47,CD9,CLU,DVL1,EGFR,ERBB2,HMGB1,ITGB5,MUC1,OLFM4,PDE6D,PLAU,PROM1,TGFB1,TIMP1,TYR,VCL,VIM
GO:0034774	secretory granule lumen	8	0.0022	ENSP00000211998,ENSP00000218388,ENSP00000219022,ENSP00000221930,ENSP00000284981,ENSP00000315130,ENSP00000345347,ENSP00000411613	AOC1,APP,CLU,HMGB1,OLFM4,TGFB1,TIMP1,VCL
GO:0031258	lamellipodium membrane	3	0.0026	ENSP00000301945,ENSP00000351209,ENSP00000398632	ANTXR1,CD44,EPHA2
GO:1990357	terminal web	2	0.0036	ENSP00000211998,ENSP00000355124	KRT19,VCL
GO:0031093	platelet alpha granule lumen	4	0.004	ENSP00000218388,ENSP00000221930,ENSP00000284981,ENSP00000315130	APP,CLU,TGFB1,TIMP1
GO:0044433	cytoplasmic vesicle part	17	0.0048	ENSP00000211998,ENSP00000218388,ENSP00000219022,ENSP00000221930,ENSP00000263321,ENSP00000269571,ENSP00000275493,ENSP00000284981,ENSP00000287600,ENSP00000301945,ENSP00000315130,ENSP00000345347,ENSP00000355361,ENSP00000361850,ENSP00000371958,ENSP00000398632,ENSP00000411613	ANTXR1,AOC1,APP,CD44,CD47,CD9,CLU,EGFR,ERBB2,HMGB1,OLFM4,PDE6D,PLAU,TGFB1,TIMP1,TYR,VCL
GO:0030141	secretory granule	12	0.006	ENSP00000211998,ENSP00000218388,ENSP00000219022,ENSP00000221930,ENSP00000284981,ENSP00000315130,ENSP00000345347,ENSP00000355361,ENSP00000361850,ENSP00000371958,ENSP00000398632,ENSP00000411613	AOC1,APP,CD44,CD47,CD9,CLU,HMGB1,OLFM4,PLAU,TGFB1,TIMP1,VCL
GO:0032587	ruffle membrane	4	0.009	ENSP00000286827,ENSP00000316029,ENSP00000351209,ENSP00000375892	AKT2,EPHA2,TIAM1,TLN1
GO:0030054	cell junction	13	0.0095	ENSP00000211998,ENSP00000257290,ENSP00000263735,ENSP00000284981,ENSP00000286827,ENSP00000304290,ENSP00000331678,ENSP00000351209,ENSP00000367154,ENSP00000376457,ENSP00000411613,ENSP00000446121,ENSP00000449404	AOC1,APP,CHRNB1,ECT2,EPCAM,EPHA2,KRT8,LIMS1,PDGFRA,PKP3,RSU1,TIAM1,VCL
GO:0042581	specific granule	5	0.0102	ENSP00000211998,ENSP00000219022,ENSP00000355361,ENSP00000361850,ENSP00000411613	AOC1,CD47,OLFM4,PLAU,VCL
GO:0001726	ruffle	5	0.0113	ENSP00000248444,ENSP00000286827,ENSP00000316029,ENSP00000351209,ENSP00000375892	AKT2,EPHA2,TIAM1,TLN1,VIL1
GO:0120025	plasma membrane bounded cell projection	19	0.0127	ENSP00000221930,ENSP00000248444,ENSP00000257290,ENSP00000284981,ENSP00000286827,ENSP00000287600,ENSP00000293599,ENSP00000301945,ENSP00000315130,ENSP00000316029,ENSP00000332576,ENSP00000345347,ENSP00000345873,ENSP00000351209,ENSP00000368169,ENSP00000375892,ENSP00000398632,ENSP00000426809,ENSP00000446007	AKT2,ANTXR1,APP,AQP5,CD44,CLU,DVL1,EPHA2,HMGB1,OSBP2,PDE6D,PDGFRA,PROM1,SLC26A3,TGFB1,TIAM1,TLN1,VIL1,VIM
GO:0005796	Golgi lumen	4	0.0134	ENSP00000221930,ENSP00000284981,ENSP00000484824,ENSP00000485028	APP,MUC1,MUC13,TGFB1
GO:0031410	cytoplasmic vesicle	21	0.0135	ENSP00000211998,ENSP00000218388,ENSP00000219022,ENSP00000221930,ENSP00000263321,ENSP00000269571,ENSP00000275493,ENSP00000284981,ENSP00000287600,ENSP00000296181,ENSP00000301945,ENSP00000315130,ENSP00000345347,ENSP00000355361,ENSP00000361850,ENSP00000368169,ENSP00000371958,ENSP00000375892,ENSP00000398632,ENSP00000411613,ENSP00000446007	AKT2,ANTXR1,AOC1,APP,CD44,CD47,CD9,CLU,DVL1,EGFR,ERBB2,HMGB1,ITGB5,OLFM4,PDE6D,PLAU,TGFB1,TIMP1,TYR,VCL,VIM
GO:0030027	lamellipodium	5	0.0164	ENSP00000248444,ENSP00000284981,ENSP00000301945,ENSP00000351209,ENSP00000398632	ANTXR1,APP,CD44,EPHA2,VIL1
GO:0030864	cortical actin cytoskeleton	3	0.0178	ENSP00000211998,ENSP00000229922,ENSP00000355124	CAP2,KRT19,VCL
GO:0044448	cell cortex part	4	0.021	ENSP00000211998,ENSP00000229922,ENSP00000295834,ENSP00000355124	CAP2,FABP1,KRT19,VCL
GO:0097440	apical dendrite	2	0.0232	ENSP00000315130,ENSP00000332576	CLU,OSBP2
GO:0035580	specific granule lumen	3	0.0256	ENSP00000211998,ENSP00000219022,ENSP00000411613	AOC1,OLFM4,VCL
GO:0005925	focal adhesion	4	0.029	ENSP00000211998,ENSP00000351209,ENSP00000367154,ENSP00000446121	EPHA2,LIMS1,RSU1,VCL
GO:0016327	apicolateral plasma membrane	2	0.0298	ENSP00000355124,ENSP00000449404	KRT19,KRT8
GO:0043296	apical junction complex	4	0.0303	ENSP00000211998,ENSP00000263735,ENSP00000376457,ENSP00000411613	AOC1,ECT2,EPCAM,VCL
GO:0005938	cell cortex	5	0.0333	ENSP00000211998,ENSP00000229922,ENSP00000295834,ENSP00000355124,ENSP00000375892	AKT2,CAP2,FABP1,KRT19,VCL
GO:0016010	dystrophin-associated glycoprotein complex	2	0.0333	ENSP00000355124,ENSP00000449404	KRT19,KRT8
GO:0044430	cytoskeletal part	15	0.0382	ENSP00000167588,ENSP00000211998,ENSP00000229922,ENSP00000248444,ENSP00000264670,ENSP00000284981,ENSP00000286827,ENSP00000301633,ENSP00000341483,ENSP00000348163,ENSP00000355124,ENSP00000368169,ENSP00000376457,ENSP00000446007,ENSP00000449404	APP,BIRC5,CAP2,DVL1,ECT2,KRT19,KRT20,KRT8,NSUN2,PLS3,RANBP3,TIAM1,VCL,VIL1,VIM
GO:0030057	desmosome	2	0.0416	ENSP00000211998,ENSP00000331678	PKP3,VCL
GO:0005856	cytoskeleton	18	0.0476	ENSP00000167588,ENSP00000211998,ENSP00000229922,ENSP00000248444,ENSP00000258080,ENSP00000264670,ENSP00000284981,ENSP00000286827,ENSP00000287600,ENSP00000301633,ENSP00000316029,ENSP00000341483,ENSP00000348163,ENSP00000355124,ENSP00000368169,ENSP00000376457,ENSP00000446007,ENSP00000449404	APP,BIRC5,CAP2,DVL1,ECT2,HTRA2,KRT19,KRT20,KRT8,NSUN2,PDE6D,PLS3,RANBP3,TIAM1,TLN1,VCL,VIL1,VIM
GO:0034364	high-density lipoprotein particle	2	0.0495	ENSP00000284981,ENSP00000315130	APP,CLU

## Sheet: CTC molecular function
#pathway ID	pathway description	observed gene count	false discovery rate	matching proteins in your network (IDs)	matching proteins in your network (labels)
GO:0050839	cell adhesion molecule binding	10	2.38e-05	ENSP00000219022,ENSP00000263735,ENSP00000275493,ENSP00000284981,ENSP00000316029,ENSP00000331678,ENSP00000345347,ENSP00000371958,ENSP00000377003,ENSP00000426809	APP,CD9,EGFR,EPCAM,HMGB1,OLFM4,PKP3,PROM1,TLN1,TSPAN8
GO:0005515	protein binding	56	2.98e-05	ENSP00000211998,ENSP00000218388,ENSP00000219022,ENSP00000221930,ENSP00000221992,ENSP00000229922,ENSP00000242261,ENSP00000244930,ENSP00000245451,ENSP00000248444,ENSP00000249749,ENSP00000257290,ENSP00000258080,ENSP00000263321,ENSP00000263735,ENSP00000264094,ENSP00000267101,ENSP00000269571,ENSP00000275493,ENSP00000283147,ENSP00000284981,ENSP00000286827,ENSP00000287600,ENSP00000293599,ENSP00000301633…	AGR2,ANTXR1,AOC1,APP,AQP5,BIRC5,BMI1,BMP4,BMP6,CAP2,CD9,CEACAM5,CLU,DLL4,DVL1,ECT2,EGFR,EPCAM,ERBB2,ERBB3,FAM132A,FAM3D,GUCA2A,HMGB1,HTRA2,KRT8,LIMS1,LOXL3,MET,MUC1,MUC13,MYC,OLFM4,PDE6D,PDGFRA,PKP3,PLS3,PROM1,PTTG1,RANBP3,SCGB2A1,TBX20,TGFB1,TIAM1,TIMP1,TK1,TLN1,TSPAN8,TWIST1,TYR,UBE2C,UGT1A9,VCL,VIL1,VIM,ZEB2
GO:0044877	protein-containing complex binding	19	2.98e-05	ENSP00000248444,ENSP00000257290,ENSP00000260302,ENSP00000263735,ENSP00000275493,ENSP00000284981,ENSP00000301945,ENSP00000315130,ENSP00000316029,ENSP00000345347,ENSP00000348163,ENSP00000355124,ENSP00000371958,ENSP00000377003,ENSP00000398632,ENSP00000411613,ENSP00000446007,ENSP00000449404,ENSP00000479618	ANTXR1,AOC1,APP,CD44,CD9,CLU,EGFR,EPCAM,HMGB1,KRT19,KRT8,MMP13,MYC,PDGFRA,PLS3,TLN1,TSPAN8,VIL1,VIM
GO:0046983	protein dimerization activity	21	7.22e-05	ENSP00000219022,ENSP00000221930,ENSP00000221992,ENSP00000242261,ENSP00000244930,ENSP00000248444,ENSP00000257290,ENSP00000263321,ENSP00000267101,ENSP00000269571,ENSP00000275493,ENSP00000283147,ENSP00000284981,ENSP00000301633,ENSP00000315130,ENSP00000346768,ENSP00000376457,ENSP00000391490,ENSP00000411613,ENSP00000479618,ENSP00000485028	AGR2,AOC1,APP,BIRC5,BMP6,CEACAM5,CLU,ECT2,EGFR,ERBB2,ERBB3,MUC13,MYC,OLFM4,PDGFRA,SCGB2A1,TGFB1,TWIST1,TYR,UGT1A9,VIL1
GO:0042802	identical protein binding	24	0.00015	ENSP00000219022,ENSP00000221930,ENSP00000221992,ENSP00000229922,ENSP00000242261,ENSP00000248444,ENSP00000257290,ENSP00000258080,ENSP00000263321,ENSP00000267101,ENSP00000269571,ENSP00000275493,ENSP00000284981,ENSP00000293599,ENSP00000301633,ENSP00000301634,ENSP00000317272,ENSP00000346768,ENSP00000368169,ENSP00000376457,ENSP00000391490,ENSP00000411613,ENSP00000446007,ENSP00000485028	AGR2,AOC1,APP,AQP5,BIRC5,CAP2,CEACAM5,DVL1,ECT2,EGFR,ERBB2,ERBB3,HTRA2,MET,MUC13,OLFM4,PDGFRA,TGFB1,TK1,TWIST1,TYR,UGT1A9,VIL1,VIM
GO:0098772	molecular function regulator	24	0.00018	ENSP00000218388,ENSP00000221930,ENSP00000245451,ENSP00000248444,ENSP00000257290,ENSP00000267101,ENSP00000269571,ENSP00000275493,ENSP00000283147,ENSP00000284981,ENSP00000286827,ENSP00000287600,ENSP00000297785,ENSP00000301633,ENSP00000317272,ENSP00000329137,ENSP00000345347,ENSP00000346768,ENSP00000349493,ENSP00000351632,ENSP00000372221,ENSP00000376457,ENSP00000377536,ENSP00000454157	ALDH1A1,APP,BIRC5,BMP4,BMP6,ECT2,EGFR,ERBB2,ERBB3,FAM132A,FAM3D,GUCA2A,HMGB1,MET,PDE6D,PDGFRA,PTTG1,SERPINB5,TGFB1,TIAM1,TIMP1,UGT1A9,VIL1,ZEB2
GO:0046982	protein heterodimerization activity	12	0.00044	ENSP00000221930,ENSP00000242261,ENSP00000244930,ENSP00000263321,ENSP00000267101,ENSP00000269571,ENSP00000275493,ENSP00000283147,ENSP00000284981,ENSP00000301633,ENSP00000315130,ENSP00000346768	APP,BIRC5,BMP6,CLU,EGFR,ERBB2,ERBB3,SCGB2A1,TGFB1,TWIST1,TYR,UGT1A9
GO:0042803	protein homodimerization activity	15	0.00049	ENSP00000219022,ENSP00000221930,ENSP00000221992,ENSP00000242261,ENSP00000248444,ENSP00000257290,ENSP00000263321,ENSP00000267101,ENSP00000284981,ENSP00000301633,ENSP00000346768,ENSP00000376457,ENSP00000391490,ENSP00000411613,ENSP00000485028	AGR2,AOC1,APP,BIRC5,CEACAM5,ECT2,ERBB3,MUC13,OLFM4,PDGFRA,TGFB1,TWIST1,TYR,UGT1A9,VIL1
GO:0004714	transmembrane receptor protein tyrosine kinase activity	5	0.00069	ENSP00000257290,ENSP00000269571,ENSP00000275493,ENSP00000317272,ENSP00000351209	EGFR,EPHA2,ERBB2,MET,PDGFRA
GO:0005102	signaling receptor binding	20	0.001	ENSP00000218388,ENSP00000221930,ENSP00000245451,ENSP00000249749,ENSP00000257290,ENSP00000269571,ENSP00000275493,ENSP00000283147,ENSP00000284981,ENSP00000286827,ENSP00000315130,ENSP00000316029,ENSP00000329137,ENSP00000345347,ENSP00000349493,ENSP00000351632,ENSP00000368169,ENSP00000371958,ENSP00000377003,ENSP00000391490	AGR2,APP,BMP4,BMP6,CD9,CLU,DLL4,DVL1,EGFR,ERBB2,FAM132A,FAM3D,GUCA2A,HMGB1,PDGFRA,TGFB1,TIAM1,TIMP1,TLN1,TSPAN8
GO:0005178	integrin binding	6	0.001	ENSP00000275493,ENSP00000284981,ENSP00000316029,ENSP00000345347,ENSP00000371958,ENSP00000377003	APP,CD9,EGFR,HMGB1,TLN1,TSPAN8
GO:0017016	Ras GTPase binding	11	0.001	ENSP00000257290,ENSP00000267101,ENSP00000269571,ENSP00000275493,ENSP00000286827,ENSP00000287600,ENSP00000301633,ENSP00000317272,ENSP00000341483,ENSP00000368169,ENSP00000376457	BIRC5,DVL1,ECT2,EGFR,ERBB2,ERBB3,MET,PDE6D,PDGFRA,RANBP3,TIAM1
GO:0046934	phosphatidylinositol-4,5-bisphosphate 3-kinase activity	5	0.001	ENSP00000257290,ENSP00000267101,ENSP00000269571,ENSP00000275493,ENSP00000317272	EGFR,ERBB2,ERBB3,MET,PDGFRA
GO:0030234	enzyme regulator activity	15	0.0021	ENSP00000218388,ENSP00000221930,ENSP00000248444,ENSP00000267101,ENSP00000284981,ENSP00000287600,ENSP00000297785,ENSP00000301633,ENSP00000345347,ENSP00000346768,ENSP00000349493,ENSP00000372221,ENSP00000376457,ENSP00000377536,ENSP00000454157	ALDH1A1,APP,BIRC5,ECT2,ERBB3,GUCA2A,HMGB1,PDE6D,PTTG1,SERPINB5,TGFB1,TIMP1,UGT1A9,VIL1,ZEB2
GO:0004866	endopeptidase inhibitor activity	6	0.0038	ENSP00000218388,ENSP00000248444,ENSP00000284981,ENSP00000301633,ENSP00000372221,ENSP00000377536	APP,BIRC5,PTTG1,SERPINB5,TIMP1,VIL1
GO:0005088	Ras guanyl-nucleotide exchange factor activity	7	0.0038	ENSP00000257290,ENSP00000267101,ENSP00000269571,ENSP00000275493,ENSP00000286827,ENSP00000317272,ENSP00000376457	ECT2,EGFR,ERBB2,ERBB3,MET,PDGFRA,TIAM1
GO:0005488	binding	73	0.0039	ENSP00000211998,ENSP00000218388,ENSP00000219022,ENSP00000221930,ENSP00000221992,ENSP00000229922,ENSP00000242261,ENSP00000244930,ENSP00000245451,ENSP00000248444,ENSP00000249749,ENSP00000255448,ENSP00000257290,ENSP00000258080,ENSP00000260302,ENSP00000263321,ENSP00000263735,ENSP00000264094,ENSP00000264670,ENSP00000267101,ENSP00000269571,ENSP00000275493,ENSP00000283147,ENSP00000284981,ENSP00000286827…	AGR2,AKT2,ALDH1A1,ANTXR1,AOC1,APP,AQP5,BIRC5,BMI1,BMP4,BMP6,CAP2,CD44,CD9,CEACAM5,CHRNB1,CHST14,CLU,DCLK1,DLL4,DVL1,ECT2,EGFR,ELAVL4,EPCAM,EPHA2,ERBB2,ERBB3,FABP1,FAM132A,FAM3D,GALNT12,GUCA2A,HMGB1,HTRA2,ITGB5,KRT19,KRT8,LGALS4,LIMS1,LOXL3,MET,MMP13,MUC1,MUC13,MYC,NSUN2,OLFM4,OSBP2,PDE6D,PDGFRA,PKP3,PLS3,PROM1,PTTG1,RANBP3,REG4,SCGB2A1,TBX20,TGFB1,TIAM1,TIMP1,TK1,TLN1,TSPAN8,TWIST1,TYR,UBE2C,UGT1…
GO:0004713	protein tyrosine kinase activity	6	0.0042	ENSP00000257290,ENSP00000267101,ENSP00000269571,ENSP00000275493,ENSP00000317272,ENSP00000351209	EGFR,EPHA2,ERBB2,ERBB3,MET,PDGFRA
GO:0045296	cadherin binding	3	0.0043	ENSP00000219022,ENSP00000263735,ENSP00000426809	EPCAM,OLFM4,PROM1
GO:0048018	receptor ligand activity	9	0.0055	ENSP00000218388,ENSP00000221930,ENSP00000245451,ENSP00000283147,ENSP00000284981,ENSP00000329137,ENSP00000345347,ENSP00000349493,ENSP00000351632	APP,BMP4,BMP6,FAM132A,FAM3D,GUCA2A,HMGB1,TGFB1,TIMP1
GO:0019899	enzyme binding	22	0.0078	ENSP00000211998,ENSP00000218388,ENSP00000221930,ENSP00000229922,ENSP00000257290,ENSP00000267101,ENSP00000269571,ENSP00000275493,ENSP00000284981,ENSP00000286827,ENSP00000287600,ENSP00000301633,ENSP00000315130,ENSP00000317272,ENSP00000331678,ENSP00000341483,ENSP00000345347,ENSP00000346768,ENSP00000348838,ENSP00000368169,ENSP00000376457,ENSP00000446121	APP,BIRC5,CAP2,CLU,DVL1,ECT2,EGFR,ERBB2,ERBB3,HMGB1,LIMS1,MET,PDE6D,PDGFRA,PKP3,RANBP3,TGFB1,TIAM1,TIMP1,UBE2C,UGT1A9,VCL
GO:0004857	enzyme inhibitor activity	8	0.0079	ENSP00000218388,ENSP00000248444,ENSP00000284981,ENSP00000287600,ENSP00000301633,ENSP00000346768,ENSP00000372221,ENSP00000377536	APP,BIRC5,PDE6D,PTTG1,SERPINB5,TIMP1,UGT1A9,VIL1
GO:0005125	cytokine activity	6	0.0083	ENSP00000218388,ENSP00000221930,ENSP00000245451,ENSP00000283147,ENSP00000345347,ENSP00000351632	BMP4,BMP6,FAM3D,HMGB1,TGFB1,TIMP1
GO:0042056	chemoattractant activity	3	0.0083	ENSP00000245451,ENSP00000284981,ENSP00000345347	APP,BMP4,HMGB1
GO:0042562	hormone binding	4	0.0121	ENSP00000275493,ENSP00000284981,ENSP00000297785,ENSP00000304290	ALDH1A1,APP,CHRNB1,EGFR
GO:0051015	actin filament binding	5	0.0121	ENSP00000248444,ENSP00000275493,ENSP00000301945,ENSP00000316029,ENSP00000348163	ANTXR1,EGFR,PLS3,TLN1,VIL1
GO:0002162	dystroglycan binding	2	0.0131	ENSP00000211998,ENSP00000391490	AGR2,VCL
GO:0070700	BMP receptor binding	2	0.0131	ENSP00000245451,ENSP00000283147	BMP4,BMP6
GO:0045294	alpha-catenin binding	2	0.0175	ENSP00000211998,ENSP00000331678	PKP3,VCL
GO:0004252	serine-type endopeptidase activity	5	0.0189	ENSP00000161006,ENSP00000258080,ENSP00000260302,ENSP00000314151,ENSP00000361850	HTRA2,KLK3,MMP13,PLAU,PRSS22
GO:0005200	structural constituent of cytoskeleton	4	0.0189	ENSP00000167588,ENSP00000316029,ENSP00000355124,ENSP00000446007	KRT19,KRT20,TLN1,VIM
GO:0005160	transforming growth factor beta receptor binding	3	0.0197	ENSP00000221930,ENSP00000245451,ENSP00000283147	BMP4,BMP6,TGFB1
GO:0005507	copper ion binding	3	0.0255	ENSP00000263321,ENSP00000264094,ENSP00000411613	AOC1,LOXL3,TYR
GO:0004869	cysteine-type endopeptidase inhibitor activity	3	0.0262	ENSP00000248444,ENSP00000301633,ENSP00000377536	BIRC5,PTTG1,VIL1
GO:0008092	cytoskeletal protein binding	11	0.0286	ENSP00000211998,ENSP00000229922,ENSP00000248444,ENSP00000275493,ENSP00000286827,ENSP00000301633,ENSP00000301945,ENSP00000315130,ENSP00000316029,ENSP00000348163,ENSP00000426809	ANTXR1,BIRC5,CAP2,CLU,EGFR,PLS3,PROM1,TIAM1,TLN1,VCL,VIL1
GO:0016641	oxidoreductase activity, acting on the CH-NH2 group of donors, oxygen as acceptor	2	0.0286	ENSP00000264094,ENSP00000411613	AOC1,LOXL3
GO:0005518	collagen binding	3	0.0289	ENSP00000260302,ENSP00000301945,ENSP00000398632	ANTXR1,CD44,MMP13
GO:0003779	actin binding	7	0.0303	ENSP00000211998,ENSP00000229922,ENSP00000248444,ENSP00000275493,ENSP00000301945,ENSP00000316029,ENSP00000348163	ANTXR1,CAP2,EGFR,PLS3,TLN1,VCL,VIL1
GO:0005539	glycosaminoglycan binding	5	0.0332	ENSP00000245451,ENSP00000284981,ENSP00000346158,ENSP00000398632,ENSP00000411613	AOC1,APP,BMP4,CD44,REG4
GO:0050750	low-density lipoprotein particle receptor binding	2	0.0424	ENSP00000284981,ENSP00000315130	APP,CLU
GO:0001618	virus receptor activity	3	0.044	ENSP00000275493,ENSP00000296181,ENSP00000351209	EGFR,EPHA2,ITGB5
GO:0030295	protein kinase activator activity	3	0.044	ENSP00000221930,ENSP00000267101,ENSP00000345347	ERBB3,HMGB1,TGFB1
GO:0070412	R-SMAD binding	2	0.044	ENSP00000341483,ENSP00000454157	RANBP3,ZEB2
GO:0097367	carbohydrate derivative binding	19	0.044	ENSP00000221992,ENSP00000245451,ENSP00000248444,ENSP00000255448,ENSP00000257290,ENSP00000267101,ENSP00000269571,ENSP00000275493,ENSP00000284981,ENSP00000301634,ENSP00000302100,ENSP00000317272,ENSP00000345347,ENSP00000346158,ENSP00000348838,ENSP00000351209,ENSP00000375892,ENSP00000398632,ENSP00000411613	AKT2,AOC1,APP,BMP4,CD44,CEACAM5,DCLK1,EGFR,EPHA2,ERBB2,ERBB3,HMGB1,LGALS4,MET,PDGFRA,REG4,TK1,UBE2C,VIL1
GO:0043168	anion binding	22	0.0485	ENSP00000221992,ENSP00000245451,ENSP00000248444,ENSP00000255448,ENSP00000257290,ENSP00000267101,ENSP00000269571,ENSP00000275493,ENSP00000284981,ENSP00000295834,ENSP00000301634,ENSP00000307297,ENSP00000316029,ENSP00000317272,ENSP00000345347,ENSP00000346158,ENSP00000346768,ENSP00000348838,ENSP00000351209,ENSP00000375892,ENSP00000398632,ENSP00000411613	AKT2,AOC1,APP,BMP4,CD44,CEACAM5,CHST14,DCLK1,EGFR,EPHA2,ERBB2,ERBB3,FABP1,HMGB1,MET,PDGFRA,REG4,TK1,TLN1,UBE2C,UGT1A9,VIL1

## Sheet: CTC biological process
#pathway ID	pathway description	observed gene count	false discovery rate	matching proteins in your network (IDs)	matching proteins in your network (labels)
GO:0060429	epithelium development	28	1.99e-10	ENSP00000167588,ENSP00000211998,ENSP00000221930,ENSP00000242261,ENSP00000245451,ENSP00000248444,ENSP00000249749,ENSP00000263735,ENSP00000264094,ENSP00000264670,ENSP00000266674,ENSP00000275493,ENSP00000283147,ENSP00000317272,ENSP00000331678,ENSP00000351209,ENSP00000355124,ENSP00000368169,ENSP00000372221,ENSP00000375892,ENSP00000386170,ENSP00000391490,ENSP00000398632,ENSP00000426809,ENSP00000446007…	AGR2,AKT2,BMP4,BMP6,CD44,DLL4,DVL1,EGFR,EPCAM,EPHA2,KRT19,KRT20,KRT8,LGR5,LOXL3,MET,MYC,NSUN2,PKP3,PROM1,SERPINB5,TBX20,TGFB1,TWIST1,VCL,VIL1,VIM,ZEB2
GO:0009888	tissue development	33	4.97e-10	ENSP00000167588,ENSP00000211998,ENSP00000218388,ENSP00000221930,ENSP00000242261,ENSP00000245451,ENSP00000248444,ENSP00000249749,ENSP00000257290,ENSP00000260302,ENSP00000263735,ENSP00000264094,ENSP00000264670,ENSP00000266674,ENSP00000267101,ENSP00000275493,ENSP00000283147,ENSP00000296181,ENSP00000317272,ENSP00000331678,ENSP00000351209,ENSP00000355124,ENSP00000368169,ENSP00000372221,ENSP00000375892…	AGR2,AKT2,BMP4,BMP6,CD44,DLL4,DVL1,EGFR,EPCAM,EPHA2,ERBB3,ITGB5,KRT19,KRT20,KRT8,LGR5,LOXL3,MET,MMP13,MYC,NSUN2,PDGFRA,PKP3,PROM1,SERPINB5,TBX20,TGFB1,TIMP1,TWIST1,VCL,VIL1,VIM,ZEB2
GO:0050790	regulation of catalytic activity	36	1.84e-08	ENSP00000218388,ENSP00000221930,ENSP00000229922,ENSP00000245451,ENSP00000248444,ENSP00000257290,ENSP00000258080,ENSP00000267101,ENSP00000269571,ENSP00000275493,ENSP00000284981,ENSP00000286827,ENSP00000287600,ENSP00000295834,ENSP00000297785,ENSP00000301633,ENSP00000301945,ENSP00000315130,ENSP00000341483,ENSP00000345347,ENSP00000346768,ENSP00000348838,ENSP00000349493,ENSP00000351209,ENSP00000358730…	ADORA3,AKT2,ALDH1A1,ANTXR1,APP,BIRC5,BMI1,BMP4,CAP2,CD44,CLU,DVL1,ECT2,EGFR,EPHA2,ERBB2,ERBB3,FABP1,GUCA2A,HMGB1,HTRA2,LIMS1,MYC,PDE6D,PDGFRA,PTTG1,RANBP3,RSU1,SERPINB5,TGFB1,TIAM1,TIMP1,UBE2C,UGT1A9,VIL1,ZEB2
GO:0048468	cell development	29	3.13e-08	ENSP00000211998,ENSP00000221930,ENSP00000242261,ENSP00000245451,ENSP00000255448,ENSP00000257290,ENSP00000258080,ENSP00000264670,ENSP00000266674,ENSP00000269571,ENSP00000275493,ENSP00000283147,ENSP00000284981,ENSP00000286827,ENSP00000301945,ENSP00000304290,ENSP00000315130,ENSP00000317272,ENSP00000332576,ENSP00000345347,ENSP00000345873,ENSP00000351209,ENSP00000355124,ENSP00000368169,ENSP00000371958…	AKT2,ANTXR1,APP,BMP4,BMP6,CD9,CHRNB1,CLU,DCLK1,DVL1,EGFR,EPHA2,ERBB2,HMGB1,HTRA2,KRT19,KRT8,LGR5,MET,NSUN2,OSBP2,PDGFRA,SLC26A3,TGFB1,TIAM1,TWIST1,VCL,VIM,ZEB2
GO:0009653	anatomical structure morphogenesis	33	4.62e-08	ENSP00000211998,ENSP00000221930,ENSP00000229922,ENSP00000242261,ENSP00000245451,ENSP00000249749,ENSP00000255448,ENSP00000257290,ENSP00000260302,ENSP00000266674,ENSP00000269571,ENSP00000275493,ENSP00000283147,ENSP00000284981,ENSP00000286827,ENSP00000293599,ENSP00000296181,ENSP00000301945,ENSP00000315130,ENSP00000317272,ENSP00000351209,ENSP00000355124,ENSP00000368169,ENSP00000371958,ENSP00000372221…	AGR2,ANTXR1,APP,AQP5,BMP4,BMP6,CAP2,CD44,CD9,CLU,DCLK1,DLL4,DVL1,ECT2,EGFR,EPHA2,ERBB2,ITGB5,KRT19,KRT8,LGR5,MET,MMP13,MYC,PDGFRA,PROM1,SERPINB5,TBX20,TGFB1,TIAM1,TWIST1,VCL,ZEB2
GO:0048513	animal organ development	40	5.15e-08	ENSP00000167588,ENSP00000218388,ENSP00000221930,ENSP00000242261,ENSP00000245451,ENSP00000249749,ENSP00000255448,ENSP00000257290,ENSP00000258080,ENSP00000260302,ENSP00000263321,ENSP00000263735,ENSP00000264094,ENSP00000264670,ENSP00000266674,ENSP00000267101,ENSP00000269571,ENSP00000275493,ENSP00000283147,ENSP00000284981,ENSP00000293599,ENSP00000317272,ENSP00000331678,ENSP00000345347,ENSP00000348163…	AGR2,AKT2,APP,AQP5,BMI1,BMP4,BMP6,CD44,CD9,DCLK1,DLL4,DVL1,EGFR,EPCAM,EPHA2,ERBB2,ERBB3,HMGB1,HTRA2,KRT19,KRT20,KRT8,LGR5,LOXL3,MET,MMP13,MYC,NSUN2,PDGFRA,PKP3,PLS3,PROM1,SERPINB5,TBX20,TGFB1,TIMP1,TWIST1,TYR,VIM,ZEB2
GO:0065009	regulation of molecular function	42	1.33e-07	ENSP00000218388,ENSP00000221930,ENSP00000229922,ENSP00000242261,ENSP00000245451,ENSP00000248444,ENSP00000257290,ENSP00000258080,ENSP00000267101,ENSP00000269571,ENSP00000275493,ENSP00000283147,ENSP00000284981,ENSP00000286827,ENSP00000287600,ENSP00000295834,ENSP00000297785,ENSP00000301633,ENSP00000301945,ENSP00000315130,ENSP00000317272,ENSP00000329137,ENSP00000341483,ENSP00000345347,ENSP00000346768…	ADORA3,AKT2,ALDH1A1,ANTXR1,APP,BIRC5,BMI1,BMP4,BMP6,CAP2,CD44,CLU,DVL1,ECT2,EGFR,EPHA2,ERBB2,ERBB3,FABP1,FAM132A,FAM3D,GUCA2A,HMGB1,HTRA2,LIMS1,MET,MYC,PDE6D,PDGFRA,PLAU,PTTG1,RANBP3,RSU1,SERPINB5,TGFB1,TIAM1,TIMP1,TWIST1,UBE2C,UGT1A9,VIL1,ZEB2
GO:0048869	cellular developmental process	43	2.08e-07	ENSP00000167588,ENSP00000211998,ENSP00000221930,ENSP00000229922,ENSP00000242261,ENSP00000245451,ENSP00000248444,ENSP00000249749,ENSP00000255448,ENSP00000257290,ENSP00000258080,ENSP00000263735,ENSP00000264094,ENSP00000264670,ENSP00000266674,ENSP00000267101,ENSP00000269571,ENSP00000275493,ENSP00000283147,ENSP00000284981,ENSP00000286827,ENSP00000296181,ENSP00000301945,ENSP00000304290,ENSP00000315130…	AGR2,AKT2,ANTXR1,APP,BMP4,BMP6,CAP2,CD9,CHRNB1,CLU,DCLK1,DLL4,DVL1,ECT2,EGFR,EPCAM,EPHA2,ERBB2,ERBB3,HMGB1,HTRA2,ITGB5,KRT19,KRT20,KRT8,LGR5,LIMS1,LOXL3,MET,NSUN2,OSBP2,PDGFRA,PKP3,PROM1,SLC26A3,TBX20,TGFB1,TIAM1,TWIST1,VCL,VIL1,VIM,ZEB2
GO:0007166	cell surface receptor signaling pathway	33	3.02e-07	ENSP00000218388,ENSP00000221930,ENSP00000242261,ENSP00000245451,ENSP00000248444,ENSP00000249749,ENSP00000257290,ENSP00000267101,ENSP00000269571,ENSP00000275493,ENSP00000283147,ENSP00000284981,ENSP00000286827,ENSP00000296181,ENSP00000301633,ENSP00000304290,ENSP00000316029,ENSP00000317272,ENSP00000351209,ENSP00000355124,ENSP00000355361,ENSP00000358730,ENSP00000368169,ENSP00000371958,ENSP00000375892…	ADORA3,AKT2,APP,BIRC5,BMP4,BMP6,CD44,CD47,CD9,CHRNB1,DLL4,DVL1,EGFR,EPHA2,ERBB2,ERBB3,ITGB5,KRT19,KRT8,LIMS1,MET,MUC1,MUC13,MYC,PDGFRA,TGFB1,TIAM1,TIMP1,TLN1,TSPAN8,TWIST1,VIL1,VIM
GO:0032501	multicellular organismal process	60	3.02e-07	ENSP00000167588,ENSP00000211998,ENSP00000218388,ENSP00000221930,ENSP00000242261,ENSP00000245451,ENSP00000248444,ENSP00000249749,ENSP00000255448,ENSP00000257290,ENSP00000258080,ENSP00000260302,ENSP00000263321,ENSP00000263735,ENSP00000264094,ENSP00000264670,ENSP00000266674,ENSP00000267101,ENSP00000269571,ENSP00000275493,ENSP00000283147,ENSP00000284981,ENSP00000286827,ENSP00000287600,ENSP00000293599…	AGR2,AKT2,ANTXR1,APP,AQP5,BIRC5,BMI1,BMP4,BMP6,CD44,CD9,CHRNB1,CLU,DCLK1,DLL4,DVL1,ECT2,EGFR,EPCAM,EPHA2,ERBB2,ERBB3,FABP1,GUCA2A,HMGB1,HTRA2,ITGB5,KRT19,KRT20,KRT8,LGR5,LOXL3,MET,MMP13,MUC13,MYC,NSUN2,OSBP2,PDE6D,PDGFRA,PKP3,PLAU,PLS3,PROM1,PSG2,PTTG1,SERPINB5,SLC26A3,TBX20,TGFB1,TIAM1,TIMP1,TLN1,TSPAN8,TWIST1,TYR,VCL,VIL1,VIM,ZEB2
GO:0002009	morphogenesis of an epithelium	15	4.89e-07	ENSP00000211998,ENSP00000221930,ENSP00000242261,ENSP00000245451,ENSP00000249749,ENSP00000266674,ENSP00000275493,ENSP00000317272,ENSP00000351209,ENSP00000368169,ENSP00000372221,ENSP00000386170,ENSP00000398632,ENSP00000454157,ENSP00000479618	BMP4,CD44,DLL4,DVL1,EGFR,EPHA2,LGR5,MET,MYC,SERPINB5,TBX20,TGFB1,TWIST1,VCL,ZEB2
GO:0051336	regulation of hydrolase activity	24	8.25e-07	ENSP00000218388,ENSP00000248444,ENSP00000257290,ENSP00000258080,ENSP00000269571,ENSP00000275493,ENSP00000284981,ENSP00000286827,ENSP00000287600,ENSP00000295834,ENSP00000297785,ENSP00000301633,ENSP00000301945,ENSP00000341483,ENSP00000345347,ENSP00000351209,ENSP00000367154,ENSP00000372221,ENSP00000375892,ENSP00000376457,ENSP00000377536,ENSP00000398632,ENSP00000446121,ENSP00000479618	AKT2,ALDH1A1,ANTXR1,APP,BIRC5,CD44,ECT2,EGFR,EPHA2,ERBB2,FABP1,HMGB1,HTRA2,LIMS1,MYC,PDE6D,PDGFRA,PTTG1,RANBP3,RSU1,SERPINB5,TIAM1,TIMP1,VIL1
GO:0070848	response to growth factor	16	8.25e-07	ENSP00000221930,ENSP00000242261,ENSP00000245451,ENSP00000248444,ENSP00000249749,ENSP00000257290,ENSP00000258080,ENSP00000269571,ENSP00000275493,ENSP00000283147,ENSP00000284981,ENSP00000296181,ENSP00000351209,ENSP00000398632,ENSP00000446121,ENSP00000479618	APP,BMP4,BMP6,CD44,DLL4,EGFR,EPHA2,ERBB2,HTRA2,ITGB5,LIMS1,MYC,PDGFRA,TGFB1,TWIST1,VIL1
GO:0030154	cell differentiation	41	8.81e-07	ENSP00000167588,ENSP00000211998,ENSP00000221930,ENSP00000242261,ENSP00000245451,ENSP00000248444,ENSP00000249749,ENSP00000255448,ENSP00000257290,ENSP00000258080,ENSP00000263735,ENSP00000264094,ENSP00000264670,ENSP00000266674,ENSP00000267101,ENSP00000269571,ENSP00000275493,ENSP00000283147,ENSP00000284981,ENSP00000286827,ENSP00000296181,ENSP00000301945,ENSP00000304290,ENSP00000315130,ENSP00000317272…	AGR2,AKT2,ANTXR1,APP,BMP4,BMP6,CD9,CHRNB1,CLU,DCLK1,DLL4,DVL1,ECT2,EGFR,EPCAM,EPHA2,ERBB2,ERBB3,HMGB1,HTRA2,ITGB5,KRT19,KRT20,KRT8,LGR5,LOXL3,MET,NSUN2,OSBP2,PDGFRA,PKP3,PROM1,SLC26A3,TBX20,TGFB1,TIAM1,TWIST1,VCL,VIL1,VIM,ZEB2
GO:0048856	anatomical structure development	51	8.81e-07	ENSP00000167588,ENSP00000211998,ENSP00000218388,ENSP00000221930,ENSP00000229922,ENSP00000242261,ENSP00000245451,ENSP00000248444,ENSP00000249749,ENSP00000255448,ENSP00000257290,ENSP00000258080,ENSP00000260302,ENSP00000263321,ENSP00000263735,ENSP00000264094,ENSP00000264670,ENSP00000266674,ENSP00000267101,ENSP00000269571,ENSP00000275493,ENSP00000283147,ENSP00000284981,ENSP00000286827,ENSP00000293599…	AGR2,AKT2,ANTXR1,APP,AQP5,BMI1,BMP4,BMP6,CAP2,CD44,CD9,CHRNB1,CLU,DCLK1,DLL4,DVL1,ECT2,EGFR,EPCAM,EPHA2,ERBB2,ERBB3,HMGB1,HTRA2,ITGB5,KRT19,KRT20,KRT8,LGR5,LOXL3,MET,MMP13,MYC,NSUN2,OSBP2,PDGFRA,PKP3,PLS3,PROM1,SERPINB5,SLC26A3,TBX20,TGFB1,TIAM1,TIMP1,TWIST1,TYR,VCL,VIL1,VIM,ZEB2
GO:0043085	positive regulation of catalytic activity	25	1.05e-06	ENSP00000221930,ENSP00000245451,ENSP00000257290,ENSP00000258080,ENSP00000267101,ENSP00000269571,ENSP00000275493,ENSP00000284981,ENSP00000286827,ENSP00000295834,ENSP00000297785,ENSP00000301945,ENSP00000315130,ENSP00000341483,ENSP00000345347,ENSP00000348838,ENSP00000349493,ENSP00000351209,ENSP00000365851,ENSP00000367154,ENSP00000375892,ENSP00000376457,ENSP00000446121,ENSP00000454157,ENSP00000479618	AKT2,ALDH1A1,ANTXR1,APP,BMI1,BMP4,CLU,ECT2,EGFR,EPHA2,ERBB2,ERBB3,FABP1,GUCA2A,HMGB1,HTRA2,LIMS1,MYC,PDGFRA,RANBP3,RSU1,TGFB1,TIAM1,UBE2C,ZEB2
GO:0048731	system development	45	1.22e-06	ENSP00000167588,ENSP00000211998,ENSP00000218388,ENSP00000221930,ENSP00000242261,ENSP00000245451,ENSP00000249749,ENSP00000255448,ENSP00000257290,ENSP00000258080,ENSP00000260302,ENSP00000263321,ENSP00000263735,ENSP00000264094,ENSP00000264670,ENSP00000266674,ENSP00000267101,ENSP00000269571,ENSP00000275493,ENSP00000283147,ENSP00000284981,ENSP00000286827,ENSP00000293599,ENSP00000301945,ENSP00000315130…	AGR2,AKT2,ANTXR1,APP,AQP5,BMI1,BMP4,BMP6,CD44,CD9,CLU,DCLK1,DLL4,DVL1,ECT2,EGFR,EPCAM,EPHA2,ERBB2,ERBB3,HMGB1,HTRA2,KRT19,KRT20,KRT8,LGR5,LOXL3,MET,MMP13,MYC,NSUN2,PDGFRA,PKP3,PLS3,PROM1,SERPINB5,TBX20,TGFB1,TIAM1,TIMP1,TWIST1,TYR,VCL,VIM,ZEB2
GO:0051270	regulation of cellular component movement	20	1.26e-06	ENSP00000211998,ENSP00000218388,ENSP00000221930,ENSP00000242261,ENSP00000245451,ENSP00000248444,ENSP00000249749,ENSP00000257290,ENSP00000267101,ENSP00000269571,ENSP00000275493,ENSP00000284981,ENSP00000286827,ENSP00000317272,ENSP00000345347,ENSP00000351209,ENSP00000358730,ENSP00000361850,ENSP00000371958,ENSP00000375892	ADORA3,AKT2,APP,BMP4,CD9,DLL4,EGFR,EPHA2,ERBB2,ERBB3,HMGB1,MET,PDGFRA,PLAU,TGFB1,TIAM1,TIMP1,TWIST1,VCL,VIL1
GO:0030155	regulation of cell adhesion	17	1.3e-06	ENSP00000219022,ENSP00000221930,ENSP00000245451,ENSP00000263735,ENSP00000264094,ENSP00000267101,ENSP00000269571,ENSP00000345347,ENSP00000351209,ENSP00000355361,ENSP00000361850,ENSP00000367154,ENSP00000371958,ENSP00000391490,ENSP00000398632,ENSP00000446121,ENSP00000484824	AGR2,BMP4,CD44,CD47,CD9,EPCAM,EPHA2,ERBB2,ERBB3,HMGB1,LIMS1,LOXL3,MUC1,OLFM4,PLAU,RSU1,TGFB1
GO:2000145	regulation of cell motility	19	1.49e-06	ENSP00000211998,ENSP00000218388,ENSP00000221930,ENSP00000242261,ENSP00000245451,ENSP00000248444,ENSP00000249749,ENSP00000257290,ENSP00000267101,ENSP00000269571,ENSP00000275493,ENSP00000284981,ENSP00000286827,ENSP00000317272,ENSP00000345347,ENSP00000351209,ENSP00000358730,ENSP00000361850,ENSP00000375892	ADORA3,AKT2,APP,BMP4,DLL4,EGFR,EPHA2,ERBB2,ERBB3,HMGB1,MET,PDGFRA,PLAU,TGFB1,TIAM1,TIMP1,TWIST1,VCL,VIL1
GO:0032989	cellular component morphogenesis	18	1.51e-06	ENSP00000211998,ENSP00000229922,ENSP00000255448,ENSP00000257290,ENSP00000269571,ENSP00000275493,ENSP00000284981,ENSP00000286827,ENSP00000301945,ENSP00000315130,ENSP00000317272,ENSP00000351209,ENSP00000355124,ENSP00000368169,ENSP00000371958,ENSP00000376457,ENSP00000449404,ENSP00000454157	ANTXR1,APP,CAP2,CD9,CLU,DCLK1,DVL1,ECT2,EGFR,EPHA2,ERBB2,KRT19,KRT8,MET,PDGFRA,TIAM1,VCL,ZEB2
GO:0032502	developmental process	52	1.56e-06	ENSP00000167588,ENSP00000211998,ENSP00000218388,ENSP00000221930,ENSP00000229922,ENSP00000242261,ENSP00000245451,ENSP00000248444,ENSP00000249749,ENSP00000255448,ENSP00000257290,ENSP00000258080,ENSP00000260302,ENSP00000263321,ENSP00000263735,ENSP00000264094,ENSP00000264670,ENSP00000266674,ENSP00000267101,ENSP00000269571,ENSP00000275493,ENSP00000283147,ENSP00000284981,ENSP00000286827,ENSP00000293599…	AGR2,AKT2,ANTXR1,APP,AQP5,BMI1,BMP4,BMP6,CAP2,CD44,CD9,CHRNB1,CLU,DCLK1,DLL4,DVL1,ECT2,EGFR,EPCAM,EPHA2,ERBB2,ERBB3,HMGB1,HTRA2,ITGB5,KRT19,KRT20,KRT8,LGR5,LIMS1,LOXL3,MET,MMP13,MYC,NSUN2,OSBP2,PDGFRA,PKP3,PLS3,PROM1,SERPINB5,SLC26A3,TBX20,TGFB1,TIAM1,TIMP1,TWIST1,TYR,VCL,VIL1,VIM,ZEB2
GO:0040011	locomotion	22	2.54e-06	ENSP00000221930,ENSP00000221992,ENSP00000242261,ENSP00000245451,ENSP00000248444,ENSP00000255448,ENSP00000257290,ENSP00000263735,ENSP00000269571,ENSP00000275493,ENSP00000284981,ENSP00000286827,ENSP00000317272,ENSP00000345347,ENSP00000351209,ENSP00000355361,ENSP00000361850,ENSP00000368169,ENSP00000385706,ENSP00000386170,ENSP00000398632,ENSP00000454157	APP,BMP4,CD44,CD47,CEACAM5,DCLK1,DVL1,EGFR,EPCAM,EPHA2,ERBB2,HMGB1,MET,PDGFRA,PLAU,PSG2,TBX20,TGFB1,TIAM1,TWIST1,VIL1,ZEB2
GO:0044093	positive regulation of molecular function	27	2.54e-06	ENSP00000221930,ENSP00000242261,ENSP00000245451,ENSP00000257290,ENSP00000258080,ENSP00000267101,ENSP00000269571,ENSP00000275493,ENSP00000284981,ENSP00000286827,ENSP00000295834,ENSP00000297785,ENSP00000301945,ENSP00000315130,ENSP00000317272,ENSP00000341483,ENSP00000345347,ENSP00000348838,ENSP00000349493,ENSP00000351209,ENSP00000365851,ENSP00000367154,ENSP00000375892,ENSP00000376457,ENSP00000446121…	AKT2,ALDH1A1,ANTXR1,APP,BMI1,BMP4,CLU,ECT2,EGFR,EPHA2,ERBB2,ERBB3,FABP1,GUCA2A,HMGB1,HTRA2,LIMS1,MET,MYC,PDGFRA,RANBP3,RSU1,TGFB1,TIAM1,TWIST1,UBE2C,ZEB2
GO:0048519	negative regulation of biological process	49	2.54e-06	ENSP00000211998,ENSP00000218388,ENSP00000221930,ENSP00000221992,ENSP00000242261,ENSP00000245451,ENSP00000248444,ENSP00000249749,ENSP00000255448,ENSP00000257290,ENSP00000258080,ENSP00000263735,ENSP00000264094,ENSP00000264670,ENSP00000267101,ENSP00000269571,ENSP00000275493,ENSP00000283147,ENSP00000284981,ENSP00000287600,ENSP00000295834,ENSP00000301633,ENSP00000301945,ENSP00000314151,ENSP00000315130…	ADORA3,AGR2,AKT2,ANTXR1,APP,BIRC5,BMI1,BMP4,BMP6,CD44,CD9,CEACAM5,CLU,DCLK1,DLL4,DVL1,EGFR,EPCAM,EPHA2,ERBB2,ERBB3,FABP1,FAM132A,FAM3D,HMGB1,HTRA2,KLK3,LIMS1,LOXL3,MET,MUC1,MYC,NSUN2,PDE6D,PDGFRA,PKP3,PLAU,PTTG1,SERPINB5,TBX20,TGFB1,TIMP1,TSPAN8,TWIST1,UGT1A9,VCL,VIL1,VIM,ZEB2
GO:0032880	regulation of protein localization	19	5.96e-06	ENSP00000167588,ENSP00000221930,ENSP00000242261,ENSP00000245451,ENSP00000248444,ENSP00000255448,ENSP00000269571,ENSP00000275493,ENSP00000283147,ENSP00000284981,ENSP00000286827,ENSP00000329137,ENSP00000345347,ENSP00000351209,ENSP00000351632,ENSP00000368169,ENSP00000375892,ENSP00000376457,ENSP00000391490	AGR2,AKT2,APP,BMP4,BMP6,DCLK1,DVL1,ECT2,EGFR,EPHA2,ERBB2,FAM132A,FAM3D,HMGB1,KRT20,TGFB1,TIAM1,TWIST1,VIL1
GO:0071363	cellular response to growth factor stimulus	14	8.81e-06	ENSP00000221930,ENSP00000242261,ENSP00000245451,ENSP00000248444,ENSP00000249749,ENSP00000257290,ENSP00000258080,ENSP00000269571,ENSP00000275493,ENSP00000283147,ENSP00000284981,ENSP00000296181,ENSP00000398632,ENSP00000446121	APP,BMP4,BMP6,CD44,DLL4,EGFR,ERBB2,HTRA2,ITGB5,LIMS1,PDGFRA,TGFB1,TWIST1,VIL1
GO:0010001	glial cell differentiation	9	8.99e-06	ENSP00000221930,ENSP00000267101,ENSP00000269571,ENSP00000275493,ENSP00000284981,ENSP00000315130,ENSP00000371958,ENSP00000375892,ENSP00000446007	AKT2,APP,CD9,CLU,EGFR,ERBB2,ERBB3,TGFB1,VIM
GO:0042127	regulation of cell population proliferation	25	8.99e-06	ENSP00000218388,ENSP00000221930,ENSP00000242261,ENSP00000245451,ENSP00000249749,ENSP00000257290,ENSP00000263735,ENSP00000266674,ENSP00000267101,ENSP00000269571,ENSP00000275493,ENSP00000283147,ENSP00000284981,ENSP00000286827,ENSP00000301633,ENSP00000345347,ENSP00000355361,ENSP00000358730,ENSP00000361850,ENSP00000365851,ENSP00000371958,ENSP00000372221,ENSP00000375892,ENSP00000386170,ENSP00000479618	ADORA3,AKT2,APP,BIRC5,BMI1,BMP4,BMP6,CD47,CD9,DLL4,EGFR,EPCAM,ERBB2,ERBB3,HMGB1,LGR5,MYC,PDGFRA,PLAU,SERPINB5,TBX20,TGFB1,TIAM1,TIMP1,TWIST1
GO:0051345	positive regulation of hydrolase activity	17	9.31e-06	ENSP00000257290,ENSP00000258080,ENSP00000269571,ENSP00000275493,ENSP00000284981,ENSP00000286827,ENSP00000295834,ENSP00000297785,ENSP00000301945,ENSP00000341483,ENSP00000345347,ENSP00000351209,ENSP00000367154,ENSP00000375892,ENSP00000376457,ENSP00000446121,ENSP00000479618	AKT2,ALDH1A1,ANTXR1,APP,ECT2,EGFR,EPHA2,ERBB2,FABP1,HMGB1,HTRA2,LIMS1,MYC,PDGFRA,RANBP3,RSU1,TIAM1
GO:0060560	developmental growth involved in morphogenesis	8	1.04e-05	ENSP00000211998,ENSP00000221930,ENSP00000245451,ENSP00000255448,ENSP00000284981,ENSP00000286827,ENSP00000368169,ENSP00000454157	APP,BMP4,DCLK1,DVL1,TGFB1,TIAM1,VCL,ZEB2
GO:0007275	multicellular organism development	46	1.22e-05	ENSP00000167588,ENSP00000211998,ENSP00000218388,ENSP00000221930,ENSP00000242261,ENSP00000245451,ENSP00000249749,ENSP00000255448,ENSP00000257290,ENSP00000258080,ENSP00000260302,ENSP00000263321,ENSP00000263735,ENSP00000264094,ENSP00000264670,ENSP00000266674,ENSP00000267101,ENSP00000269571,ENSP00000275493,ENSP00000283147,ENSP00000284981,ENSP00000286827,ENSP00000293599,ENSP00000296181,ENSP00000301945…	AGR2,AKT2,ANTXR1,APP,AQP5,BMI1,BMP4,BMP6,CD44,CD9,CLU,DCLK1,DLL4,DVL1,ECT2,EGFR,EPCAM,EPHA2,ERBB2,ERBB3,HMGB1,HTRA2,ITGB5,KRT19,KRT20,KRT8,LGR5,LOXL3,MET,MMP13,MYC,NSUN2,PDGFRA,PKP3,PLS3,PROM1,SERPINB5,TBX20,TGFB1,TIAM1,TIMP1,TWIST1,TYR,VCL,VIM,ZEB2
GO:0007165	signal transduction	46	1.28e-05	ENSP00000218388,ENSP00000221930,ENSP00000229922,ENSP00000242261,ENSP00000244930,ENSP00000245451,ENSP00000248444,ENSP00000249749,ENSP00000255448,ENSP00000257290,ENSP00000258080,ENSP00000263735,ENSP00000266674,ENSP00000267101,ENSP00000269571,ENSP00000275493,ENSP00000283147,ENSP00000284981,ENSP00000286827,ENSP00000296181,ENSP00000301633,ENSP00000301945,ENSP00000304290,ENSP00000315130,ENSP00000316029…	ADORA3,AKT2,ANTXR1,APP,BIRC5,BMP4,BMP6,CAP2,CD44,CD47,CD9,CHRNB1,CLU,DCLK1,DLL4,DVL1,ECT2,EGFR,EPCAM,EPHA2,ERBB2,ERBB3,GPA33,HMGB1,HTRA2,ITGB5,KRT19,KRT8,LGR5,LIMS1,MET,MUC1,MUC13,MYC,PDGFRA,PLAU,RSU1,SCGB2A1,TGFB1,TIAM1,TIMP1,TLN1,TSPAN8,TWIST1,VIL1,VIM
GO:0051128	regulation of cellular component organization	30	1.61e-05	ENSP00000219022,ENSP00000221930,ENSP00000242261,ENSP00000245451,ENSP00000248444,ENSP00000257290,ENSP00000258080,ENSP00000269571,ENSP00000275493,ENSP00000284981,ENSP00000286827,ENSP00000301633,ENSP00000301945,ENSP00000315130,ENSP00000317272,ENSP00000341483,ENSP00000345347,ENSP00000348838,ENSP00000351209,ENSP00000355361,ENSP00000368169,ENSP00000375892,ENSP00000377536,ENSP00000386170,ENSP00000398632…	AKT2,ANTXR1,APP,BIRC5,BMP4,CD44,CD47,CLU,DVL1,EGFR,EPHA2,ERBB2,HMGB1,HTRA2,LIMS1,MET,MUC1,MYC,OLFM4,PDGFRA,PTTG1,RANBP3,TBX20,TGFB1,TIAM1,TWIST1,UBE2C,VIL1,VIM,ZEB2
GO:0008284	positive regulation of cell population proliferation	18	1.62e-05	ENSP00000218388,ENSP00000221930,ENSP00000242261,ENSP00000245451,ENSP00000249749,ENSP00000257290,ENSP00000263735,ENSP00000269571,ENSP00000275493,ENSP00000283147,ENSP00000286827,ENSP00000301633,ENSP00000345347,ENSP00000355361,ENSP00000365851,ENSP00000375892,ENSP00000386170,ENSP00000479618	AKT2,BIRC5,BMI1,BMP4,BMP6,CD47,DLL4,EGFR,EPCAM,ERBB2,HMGB1,MYC,PDGFRA,TBX20,TGFB1,TIAM1,TIMP1,TWIST1
GO:0048523	negative regulation of cellular process	44	1.7e-05	ENSP00000211998,ENSP00000218388,ENSP00000221930,ENSP00000221992,ENSP00000242261,ENSP00000245451,ENSP00000248444,ENSP00000249749,ENSP00000257290,ENSP00000258080,ENSP00000263735,ENSP00000264094,ENSP00000264670,ENSP00000267101,ENSP00000269571,ENSP00000275493,ENSP00000283147,ENSP00000284981,ENSP00000295834,ENSP00000301633,ENSP00000301945,ENSP00000315130,ENSP00000317272,ENSP00000329137,ENSP00000331678…	ADORA3,AGR2,AKT2,ANTXR1,APP,BIRC5,BMI1,BMP4,BMP6,CD44,CD9,CEACAM5,CLU,DLL4,DVL1,EGFR,EPCAM,EPHA2,ERBB2,ERBB3,FABP1,FAM132A,FAM3D,HMGB1,HTRA2,LIMS1,LOXL3,MET,MUC1,MYC,NSUN2,PDGFRA,PKP3,PTTG1,SERPINB5,TBX20,TGFB1,TIMP1,TWIST1,UGT1A9,VCL,VIL1,VIM,ZEB2
GO:0035295	tube development	17	1.93e-05	ENSP00000221930,ENSP00000242261,ENSP00000245451,ENSP00000249749,ENSP00000257290,ENSP00000263735,ENSP00000264094,ENSP00000266674,ENSP00000275493,ENSP00000317272,ENSP00000345347,ENSP00000351209,ENSP00000368169,ENSP00000386170,ENSP00000391490,ENSP00000454157,ENSP00000479618	AGR2,BMP4,DLL4,DVL1,EGFR,EPCAM,EPHA2,HMGB1,LGR5,LOXL3,MET,MYC,PDGFRA,TBX20,TGFB1,TWIST1,ZEB2
GO:0060562	epithelial tube morphogenesis	11	2.01e-05	ENSP00000221930,ENSP00000242261,ENSP00000245451,ENSP00000249749,ENSP00000266674,ENSP00000317272,ENSP00000351209,ENSP00000368169,ENSP00000386170,ENSP00000454157,ENSP00000479618	BMP4,DLL4,DVL1,EPHA2,LGR5,MET,MYC,TBX20,TGFB1,TWIST1,ZEB2
GO:0032268	regulation of cellular protein metabolic process	31	2.08e-05	ENSP00000218388,ENSP00000221930,ENSP00000242261,ENSP00000245451,ENSP00000248444,ENSP00000257290,ENSP00000258080,ENSP00000267101,ENSP00000269571,ENSP00000275493,ENSP00000283147,ENSP00000284981,ENSP00000286827,ENSP00000295834,ENSP00000301633,ENSP00000301945,ENSP00000315130,ENSP00000345347,ENSP00000348838,ENSP00000351209,ENSP00000365851,ENSP00000368169,ENSP00000372221,ENSP00000375892,ENSP00000376457…	AKT2,ANTXR1,APP,BIRC5,BMI1,BMP4,BMP6,CD44,CLU,DVL1,ECT2,EGFR,EPHA2,ERBB2,ERBB3,FABP1,HMGB1,HTRA2,MUC1,MYC,PDGFRA,PTTG1,SERPINB5,TGFB1,TIAM1,TIMP1,TWIST1,UBE2C,VIL1,VIM,ZEB2
GO:0007154	cell communication	48	2.49e-05	ENSP00000167588,ENSP00000218388,ENSP00000221930,ENSP00000229922,ENSP00000242261,ENSP00000244930,ENSP00000245451,ENSP00000248444,ENSP00000249749,ENSP00000255448,ENSP00000257290,ENSP00000258080,ENSP00000263735,ENSP00000266674,ENSP00000267101,ENSP00000269571,ENSP00000275493,ENSP00000283147,ENSP00000284981,ENSP00000286827,ENSP00000296181,ENSP00000301633,ENSP00000301945,ENSP00000304290,ENSP00000315130…	ADORA3,AKT2,ANTXR1,AOC1,APP,BIRC5,BMP4,BMP6,CAP2,CD44,CD47,CD9,CHRNB1,CLU,DCLK1,DLL4,DVL1,ECT2,EGFR,EPCAM,EPHA2,ERBB2,ERBB3,GPA33,HMGB1,HTRA2,ITGB5,KRT19,KRT20,KRT8,LGR5,LIMS1,MET,MUC1,MUC13,MYC,PDGFRA,PLAU,RSU1,SCGB2A1,TGFB1,TIAM1,TIMP1,TLN1,TSPAN8,TWIST1,VIL1,VIM
GO:0051347	positive regulation of transferase activity	15	2.72e-05	ENSP00000221930,ENSP00000245451,ENSP00000257290,ENSP00000267101,ENSP00000269571,ENSP00000275493,ENSP00000284981,ENSP00000286827,ENSP00000315130,ENSP00000345347,ENSP00000348838,ENSP00000365851,ENSP00000376457,ENSP00000454157,ENSP00000479618	APP,BMI1,BMP4,CLU,ECT2,EGFR,ERBB2,ERBB3,HMGB1,MYC,PDGFRA,TGFB1,TIAM1,UBE2C,ZEB2
GO:0097435	supramolecular fiber organization	12	2.75e-05	ENSP00000167588,ENSP00000229922,ENSP00000248444,ENSP00000257290,ENSP00000264094,ENSP00000284981,ENSP00000296181,ENSP00000348163,ENSP00000355124,ENSP00000368169,ENSP00000446007,ENSP00000449404	APP,CAP2,DVL1,ITGB5,KRT19,KRT20,KRT8,LOXL3,PDGFRA,PLS3,VIL1,VIM
GO:0048585	negative regulation of response to stimulus	23	2.81e-05	ENSP00000221930,ENSP00000242261,ENSP00000245451,ENSP00000249749,ENSP00000257290,ENSP00000258080,ENSP00000264094,ENSP00000267101,ENSP00000269571,ENSP00000275493,ENSP00000284981,ENSP00000315130,ENSP00000317272,ENSP00000329137,ENSP00000351209,ENSP00000361850,ENSP00000368169,ENSP00000371958,ENSP00000377003,ENSP00000386170,ENSP00000398632,ENSP00000479618,ENSP00000484824	APP,BMP4,CD44,CD9,CLU,DLL4,DVL1,EGFR,EPHA2,ERBB2,ERBB3,FAM132A,HTRA2,LOXL3,MET,MUC1,MYC,PDGFRA,PLAU,TBX20,TGFB1,TSPAN8,TWIST1
GO:0021782	glial cell development	7	3.06e-05	ENSP00000221930,ENSP00000275493,ENSP00000284981,ENSP00000315130,ENSP00000371958,ENSP00000375892,ENSP00000446007	AKT2,APP,CD9,CLU,EGFR,TGFB1,VIM
GO:0032270	positive regulation of cellular protein metabolic process	23	3.13e-05	ENSP00000221930,ENSP00000245451,ENSP00000257290,ENSP00000258080,ENSP00000267101,ENSP00000269571,ENSP00000275493,ENSP00000283147,ENSP00000284981,ENSP00000286827,ENSP00000301945,ENSP00000315130,ENSP00000345347,ENSP00000348838,ENSP00000365851,ENSP00000368169,ENSP00000375892,ENSP00000376457,ENSP00000398632,ENSP00000446007,ENSP00000454157,ENSP00000479618,ENSP00000484824	AKT2,ANTXR1,APP,BMI1,BMP4,BMP6,CD44,CLU,DVL1,ECT2,EGFR,ERBB2,ERBB3,HMGB1,HTRA2,MUC1,MYC,PDGFRA,TGFB1,TIAM1,UBE2C,VIM,ZEB2
GO:0050793	regulation of developmental process	30	3.3e-05	ENSP00000218388,ENSP00000219022,ENSP00000221930,ENSP00000221992,ENSP00000242261,ENSP00000245451,ENSP00000248444,ENSP00000249749,ENSP00000257290,ENSP00000258080,ENSP00000264094,ENSP00000267101,ENSP00000269571,ENSP00000275493,ENSP00000283147,ENSP00000284981,ENSP00000286827,ENSP00000314151,ENSP00000345347,ENSP00000351209,ENSP00000368169,ENSP00000376457,ENSP00000386170,ENSP00000391490,ENSP00000398632…	AGR2,APP,BMP4,BMP6,CD44,CEACAM5,DLL4,DVL1,ECT2,EGFR,EPHA2,ERBB2,ERBB3,HMGB1,HTRA2,KLK3,LIMS1,LOXL3,MYC,OLFM4,PDGFRA,PROM1,TBX20,TGFB1,TIAM1,TIMP1,TWIST1,VIL1,VIM,ZEB2
GO:0051716	cellular response to stimulus	53	3.38e-05	ENSP00000167588,ENSP00000218388,ENSP00000221930,ENSP00000229922,ENSP00000242261,ENSP00000244930,ENSP00000245451,ENSP00000248444,ENSP00000249749,ENSP00000255448,ENSP00000257290,ENSP00000258080,ENSP00000263735,ENSP00000266674,ENSP00000267101,ENSP00000269571,ENSP00000275493,ENSP00000283147,ENSP00000284981,ENSP00000286827,ENSP00000295834,ENSP00000296181,ENSP00000301633,ENSP00000301945,ENSP00000304290…	ADORA3,AKT2,ANTXR1,AOC1,APP,BIRC5,BMP4,BMP6,CAP2,CD44,CD47,CD9,CHRNB1,CLU,DCLK1,DLL4,DVL1,ECT2,EGFR,EPCAM,EPHA2,ERBB2,ERBB3,FABP1,GPA33,GPX2,HMGB1,HTRA2,ITGB5,KRT19,KRT20,KRT8,LGR5,LIMS1,MET,MUC1,MUC13,MYC,PDGFRA,PLAU,PTTG1,RSU1,SCGB2A1,SLC26A3,TGFB1,TIAM1,TIMP1,TLN1,TSPAN8,TWIST1,UGT1A9,VIL1,VIM
GO:0022008	neurogenesis	23	3.78e-05	ENSP00000211998,ENSP00000221930,ENSP00000242261,ENSP00000245451,ENSP00000249749,ENSP00000255448,ENSP00000258080,ENSP00000267101,ENSP00000269571,ENSP00000275493,ENSP00000283147,ENSP00000284981,ENSP00000286827,ENSP00000315130,ENSP00000345347,ENSP00000368169,ENSP00000371958,ENSP00000375892,ENSP00000376457,ENSP00000386170,ENSP00000426809,ENSP00000446007,ENSP00000454157	AKT2,APP,BMP4,BMP6,CD9,CLU,DCLK1,DLL4,DVL1,ECT2,EGFR,ERBB2,ERBB3,HMGB1,HTRA2,PROM1,TBX20,TGFB1,TIAM1,TWIST1,VCL,VIM,ZEB2
GO:0030334	regulation of cell migration	16	3.78e-05	ENSP00000211998,ENSP00000218388,ENSP00000221930,ENSP00000245451,ENSP00000248444,ENSP00000249749,ENSP00000257290,ENSP00000275493,ENSP00000284981,ENSP00000286827,ENSP00000317272,ENSP00000345347,ENSP00000351209,ENSP00000358730,ENSP00000361850,ENSP00000375892	ADORA3,AKT2,APP,BMP4,DLL4,EGFR,EPHA2,HMGB1,MET,PDGFRA,PLAU,TGFB1,TIAM1,TIMP1,VCL,VIL1
GO:0050896	response to stimulus	61	3.78e-05	ENSP00000167588,ENSP00000211998,ENSP00000218388,ENSP00000219022,ENSP00000221930,ENSP00000229922,ENSP00000242261,ENSP00000244930,ENSP00000245451,ENSP00000248444,ENSP00000249749,ENSP00000255448,ENSP00000257290,ENSP00000258080,ENSP00000263321,ENSP00000263735,ENSP00000264094,ENSP00000266674,ENSP00000267101,ENSP00000269571,ENSP00000275493,ENSP00000283147,ENSP00000284981,ENSP00000286827,ENSP00000287600…	ADORA3,AKT2,ANTXR1,AOC1,APP,AQP5,BIRC5,BMP4,BMP6,CAP2,CD44,CD47,CD9,CHRNB1,CLU,DCLK1,DLL4,DVL1,ECT2,EGFR,EPCAM,EPHA2,ERBB2,ERBB3,FABP1,GPA33,GPX2,HMGB1,HTRA2,ITGB5,KLK3,KRT19,KRT20,KRT8,LGR5,LIMS1,LOXL3,MET,MUC1,MUC13,MYC,OLFM4,PDE6D,PDGFRA,PLAU,PTTG1,RSU1,SCGB2A1,SLC26A3,TFF3,TGFB1,TIAM1,TIMP1,TLN1,TSPAN8,TWIST1,TYR,UGT1A9,VCL,VIL1,VIM
GO:0060548	negative regulation of cell death	18	3.78e-05	ENSP00000218388,ENSP00000221992,ENSP00000242261,ENSP00000245451,ENSP00000248444,ENSP00000258080,ENSP00000267101,ENSP00000275493,ENSP00000284981,ENSP00000295834,ENSP00000301633,ENSP00000315130,ENSP00000317272,ENSP00000375892,ENSP00000391490,ENSP00000398632,ENSP00000479618,ENSP00000484824	AGR2,AKT2,APP,BIRC5,BMP4,CD44,CEACAM5,CLU,EGFR,ERBB3,FABP1,HTRA2,MET,MUC1,MYC,TIMP1,TWIST1,VIL1
GO:0080134	regulation of response to stress	21	4.3e-05	ENSP00000242261,ENSP00000248444,ENSP00000257290,ENSP00000258080,ENSP00000275493,ENSP00000284981,ENSP00000286827,ENSP00000315130,ENSP00000317272,ENSP00000329137,ENSP00000345347,ENSP00000355361,ENSP00000361850,ENSP00000371958,ENSP00000377003,ENSP00000391490,ENSP00000398632,ENSP00000454157,ENSP00000479618,ENSP00000484824,ENSP00000485028	AGR2,APP,CD44,CD47,CD9,CLU,EGFR,FAM132A,HMGB1,HTRA2,MET,MUC1,MUC13,MYC,PDGFRA,PLAU,TIAM1,TSPAN8,TWIST1,VIL1,ZEB2
GO:0048584	positive regulation of response to stimulus	27	4.39e-05	ENSP00000221930,ENSP00000245451,ENSP00000249749,ENSP00000257290,ENSP00000258080,ENSP00000264094,ENSP00000266674,ENSP00000267101,ENSP00000269571,ENSP00000275493,ENSP00000283147,ENSP00000284981,ENSP00000286827,ENSP00000315130,ENSP00000317272,ENSP00000329137,ENSP00000345347,ENSP00000355361,ENSP00000368169,ENSP00000375892,ENSP00000391490,ENSP00000398632,ENSP00000446121,ENSP00000454157,ENSP00000479618…	AGR2,AKT2,APP,BMP4,BMP6,CD44,CD47,CLU,DLL4,DVL1,EGFR,ERBB2,ERBB3,FAM132A,HMGB1,HTRA2,LGR5,LIMS1,LOXL3,MET,MUC1,MUC13,MYC,PDGFRA,TGFB1,TIAM1,ZEB2
GO:0051896	regulation of protein kinase B signaling	9	4.4e-05	ENSP00000221930,ENSP00000257290,ENSP00000267101,ENSP00000269571,ENSP00000275493,ENSP00000284981,ENSP00000317272,ENSP00000329137,ENSP00000351209	APP,EGFR,EPHA2,ERBB2,ERBB3,FAM132A,MET,PDGFRA,TGFB1
GO:0001654	eye development	11	4.77e-05	ENSP00000221930,ENSP00000242261,ENSP00000245451,ENSP00000257290,ENSP00000275493,ENSP00000283147,ENSP00000293599,ENSP00000345347,ENSP00000351209,ENSP00000426809,ENSP00000446007	AQP5,BMP4,BMP6,EGFR,EPHA2,HMGB1,PDGFRA,PROM1,TGFB1,TWIST1,VIM
GO:0052547	regulation of peptidase activity	12	5.19e-05	ENSP00000218388,ENSP00000248444,ENSP00000258080,ENSP00000284981,ENSP00000295834,ENSP00000301633,ENSP00000301945,ENSP00000345347,ENSP00000372221,ENSP00000377536,ENSP00000398632,ENSP00000479618	ANTXR1,APP,BIRC5,CD44,FABP1,HMGB1,HTRA2,MYC,PTTG1,SERPINB5,TIMP1,VIL1
GO:0070372	regulation of ERK1 and ERK2 cascade	10	5.25e-05	ENSP00000221930,ENSP00000245451,ENSP00000257290,ENSP00000269571,ENSP00000275493,ENSP00000284981,ENSP00000286827,ENSP00000345347,ENSP00000351209,ENSP00000398632	APP,BMP4,CD44,EGFR,EPHA2,ERBB2,HMGB1,PDGFRA,TGFB1,TIAM1
GO:0048583	regulation of response to stimulus	39	5.59e-05	ENSP00000218388,ENSP00000221930,ENSP00000242261,ENSP00000245451,ENSP00000248444,ENSP00000249749,ENSP00000257290,ENSP00000258080,ENSP00000264094,ENSP00000266674,ENSP00000267101,ENSP00000269571,ENSP00000275493,ENSP00000283147,ENSP00000284981,ENSP00000286827,ENSP00000301633,ENSP00000315130,ENSP00000317272,ENSP00000329137,ENSP00000345347,ENSP00000349493,ENSP00000351209,ENSP00000351632,ENSP00000355361…	AGR2,AKT2,APP,BIRC5,BMP4,BMP6,CD44,CD47,CD9,CLU,DLL4,DVL1,ECT2,EGFR,EPHA2,ERBB2,ERBB3,FAM132A,FAM3D,GUCA2A,HMGB1,HTRA2,LGR5,LIMS1,LOXL3,MET,MUC1,MUC13,MYC,PDGFRA,PLAU,TBX20,TGFB1,TIAM1,TIMP1,TSPAN8,TWIST1,VIL1,ZEB2
GO:0007423	sensory organ development	13	6.18e-05	ENSP00000221930,ENSP00000242261,ENSP00000245451,ENSP00000257290,ENSP00000266674,ENSP00000275493,ENSP00000283147,ENSP00000293599,ENSP00000345347,ENSP00000351209,ENSP00000368169,ENSP00000426809,ENSP00000446007	AQP5,BMP4,BMP6,DVL1,EGFR,EPHA2,HMGB1,LGR5,PDGFRA,PROM1,TGFB1,TWIST1,VIM
GO:0032879	regulation of localization	30	6.18e-05	ENSP00000167588,ENSP00000211998,ENSP00000218388,ENSP00000221930,ENSP00000242261,ENSP00000245451,ENSP00000248444,ENSP00000249749,ENSP00000255448,ENSP00000257290,ENSP00000267101,ENSP00000269571,ENSP00000275493,ENSP00000283147,ENSP00000284981,ENSP00000286827,ENSP00000315130,ENSP00000317272,ENSP00000329137,ENSP00000345347,ENSP00000351209,ENSP00000351632,ENSP00000355361,ENSP00000358730,ENSP00000361850…	ADORA3,AGR2,AKT2,APP,BMP4,BMP6,CD47,CD9,CLU,DCLK1,DLL4,DVL1,ECT2,EGFR,EPHA2,ERBB2,ERBB3,FAM132A,FAM3D,HMGB1,KRT20,MET,PDGFRA,PLAU,TGFB1,TIAM1,TIMP1,TWIST1,VCL,VIL1
GO:0051897	positive regulation of protein kinase B signaling	8	6.18e-05	ENSP00000221930,ENSP00000257290,ENSP00000267101,ENSP00000269571,ENSP00000275493,ENSP00000284981,ENSP00000317272,ENSP00000329137	APP,EGFR,ERBB2,ERBB3,FAM132A,MET,PDGFRA,TGFB1
GO:0070887	cellular response to chemical stimulus	31	6.18e-05	ENSP00000218388,ENSP00000221930,ENSP00000242261,ENSP00000244930,ENSP00000245451,ENSP00000248444,ENSP00000249749,ENSP00000257290,ENSP00000258080,ENSP00000269571,ENSP00000275493,ENSP00000283147,ENSP00000284981,ENSP00000295834,ENSP00000296181,ENSP00000301633,ENSP00000316029,ENSP00000345347,ENSP00000345873,ENSP00000346768,ENSP00000351209,ENSP00000374265,ENSP00000375892,ENSP00000376457,ENSP00000398632…	AKT2,AOC1,APP,BIRC5,BMP4,BMP6,CD44,DLL4,ECT2,EGFR,EPHA2,ERBB2,FABP1,GPX2,HMGB1,HTRA2,ITGB5,KRT8,LIMS1,MUC1,MYC,PDGFRA,SCGB2A1,SLC26A3,TGFB1,TIMP1,TLN1,TWIST1,UGT1A9,VIL1,VIM
GO:0006928	movement of cell or subcellular component	21	6.53e-05	ENSP00000221930,ENSP00000221992,ENSP00000242261,ENSP00000248444,ENSP00000255448,ENSP00000257290,ENSP00000263735,ENSP00000269571,ENSP00000275493,ENSP00000284981,ENSP00000286827,ENSP00000345347,ENSP00000351209,ENSP00000355361,ENSP00000361850,ENSP00000368169,ENSP00000385706,ENSP00000386170,ENSP00000398632,ENSP00000446007,ENSP00000454157	APP,CD44,CD47,CEACAM5,DCLK1,DVL1,EGFR,EPCAM,EPHA2,ERBB2,HMGB1,PDGFRA,PLAU,PSG2,TBX20,TGFB1,TIAM1,TWIST1,VIL1,VIM,ZEB2
GO:0035239	tube morphogenesis	14	7e-05	ENSP00000221930,ENSP00000242261,ENSP00000245451,ENSP00000249749,ENSP00000257290,ENSP00000266674,ENSP00000275493,ENSP00000317272,ENSP00000351209,ENSP00000368169,ENSP00000386170,ENSP00000391490,ENSP00000454157,ENSP00000479618	AGR2,BMP4,DLL4,DVL1,EGFR,EPHA2,LGR5,MET,MYC,PDGFRA,TBX20,TGFB1,TWIST1,ZEB2
GO:0016477	cell migration	16	7.11e-05	ENSP00000221930,ENSP00000221992,ENSP00000242261,ENSP00000255448,ENSP00000257290,ENSP00000263735,ENSP00000275493,ENSP00000286827,ENSP00000345347,ENSP00000351209,ENSP00000355361,ENSP00000361850,ENSP00000385706,ENSP00000386170,ENSP00000398632,ENSP00000454157	CD44,CD47,CEACAM5,DCLK1,EGFR,EPCAM,EPHA2,HMGB1,PDGFRA,PLAU,PSG2,TBX20,TGFB1,TIAM1,TWIST1,ZEB2
GO:0048870	cell motility	17	7.11e-05	ENSP00000221930,ENSP00000221992,ENSP00000242261,ENSP00000248444,ENSP00000255448,ENSP00000257290,ENSP00000263735,ENSP00000275493,ENSP00000286827,ENSP00000345347,ENSP00000351209,ENSP00000355361,ENSP00000361850,ENSP00000385706,ENSP00000386170,ENSP00000398632,ENSP00000454157	CD44,CD47,CEACAM5,DCLK1,EGFR,EPCAM,EPHA2,HMGB1,PDGFRA,PLAU,PSG2,TBX20,TGFB1,TIAM1,TWIST1,VIL1,ZEB2
GO:0009967	positive regulation of signal transduction	22	7.39e-05	ENSP00000221930,ENSP00000245451,ENSP00000249749,ENSP00000257290,ENSP00000258080,ENSP00000264094,ENSP00000266674,ENSP00000267101,ENSP00000269571,ENSP00000275493,ENSP00000283147,ENSP00000284981,ENSP00000286827,ENSP00000315130,ENSP00000317272,ENSP00000329137,ENSP00000345347,ENSP00000368169,ENSP00000391490,ENSP00000398632,ENSP00000446121,ENSP00000454157	AGR2,APP,BMP4,BMP6,CD44,CLU,DLL4,DVL1,EGFR,ERBB2,ERBB3,FAM132A,HMGB1,HTRA2,LGR5,LIMS1,LOXL3,MET,PDGFRA,TGFB1,TIAM1,ZEB2
GO:0051223	regulation of protein transport	14	7.46e-05	ENSP00000167588,ENSP00000221930,ENSP00000242261,ENSP00000245451,ENSP00000269571,ENSP00000275493,ENSP00000283147,ENSP00000284981,ENSP00000286827,ENSP00000329137,ENSP00000345347,ENSP00000351632,ENSP00000375892,ENSP00000376457	AKT2,APP,BMP4,BMP6,ECT2,EGFR,ERBB2,FAM132A,FAM3D,HMGB1,KRT20,TGFB1,TIAM1,TWIST1
GO:0000902	cell morphogenesis	14	7.92e-05	ENSP00000211998,ENSP00000229922,ENSP00000255448,ENSP00000269571,ENSP00000275493,ENSP00000284981,ENSP00000286827,ENSP00000301945,ENSP00000315130,ENSP00000317272,ENSP00000351209,ENSP00000368169,ENSP00000376457,ENSP00000454157	ANTXR1,APP,CAP2,CLU,DCLK1,DVL1,ECT2,EGFR,EPHA2,ERBB2,MET,TIAM1,VCL,ZEB2
GO:0030198	extracellular matrix organization	10	8.07e-05	ENSP00000218388,ENSP00000221930,ENSP00000257290,ENSP00000260302,ENSP00000264094,ENSP00000284981,ENSP00000296181,ENSP00000355361,ENSP00000372221,ENSP00000398632	APP,CD44,CD47,ITGB5,LOXL3,MMP13,PDGFRA,SERPINB5,TGFB1,TIMP1
GO:0031401	positive regulation of protein modification process	19	8.07e-05	ENSP00000221930,ENSP00000245451,ENSP00000257290,ENSP00000267101,ENSP00000269571,ENSP00000275493,ENSP00000283147,ENSP00000284981,ENSP00000286827,ENSP00000315130,ENSP00000345347,ENSP00000348838,ENSP00000365851,ENSP00000368169,ENSP00000375892,ENSP00000376457,ENSP00000398632,ENSP00000454157,ENSP00000484824	AKT2,APP,BMI1,BMP4,BMP6,CD44,CLU,DVL1,ECT2,EGFR,ERBB2,ERBB3,HMGB1,MUC1,PDGFRA,TGFB1,TIAM1,UBE2C,ZEB2
GO:0009966	regulation of signal transduction	33	8.33e-05	ENSP00000218388,ENSP00000221930,ENSP00000242261,ENSP00000245451,ENSP00000249749,ENSP00000257290,ENSP00000258080,ENSP00000264094,ENSP00000266674,ENSP00000267101,ENSP00000269571,ENSP00000275493,ENSP00000283147,ENSP00000284981,ENSP00000286827,ENSP00000301633,ENSP00000315130,ENSP00000317272,ENSP00000329137,ENSP00000345347,ENSP00000349493,ENSP00000351209,ENSP00000351632,ENSP00000361850,ENSP00000368169…	AGR2,APP,BIRC5,BMP4,BMP6,CD44,CLU,DLL4,DVL1,ECT2,EGFR,EPHA2,ERBB2,ERBB3,FAM132A,FAM3D,GUCA2A,HMGB1,HTRA2,LGR5,LIMS1,LOXL3,MET,MUC1,MYC,PDGFRA,PLAU,TBX20,TGFB1,TIAM1,TIMP1,TWIST1,ZEB2
GO:0010941	regulation of cell death	23	8.4e-05	ENSP00000218388,ENSP00000221930,ENSP00000221992,ENSP00000242261,ENSP00000245451,ENSP00000248444,ENSP00000258080,ENSP00000267101,ENSP00000275493,ENSP00000283147,ENSP00000284981,ENSP00000286827,ENSP00000295834,ENSP00000301633,ENSP00000315130,ENSP00000317272,ENSP00000345347,ENSP00000375892,ENSP00000376457,ENSP00000391490,ENSP00000398632,ENSP00000479618,ENSP00000484824	AGR2,AKT2,APP,BIRC5,BMP4,BMP6,CD44,CEACAM5,CLU,ECT2,EGFR,ERBB3,FABP1,HMGB1,HTRA2,MET,MUC1,MYC,TGFB1,TIAM1,TIMP1,TWIST1,VIL1
GO:0042221	response to chemical	40	8.4e-05	ENSP00000218388,ENSP00000221930,ENSP00000242261,ENSP00000244930,ENSP00000245451,ENSP00000248444,ENSP00000249749,ENSP00000257290,ENSP00000258080,ENSP00000263321,ENSP00000269571,ENSP00000275493,ENSP00000283147,ENSP00000284981,ENSP00000286827,ENSP00000293599,ENSP00000295834,ENSP00000296181,ENSP00000301633,ENSP00000304290,ENSP00000315130,ENSP00000316029,ENSP00000317272,ENSP00000345347,ENSP00000345873…	AKT2,AOC1,APP,AQP5,BIRC5,BMP4,BMP6,CD44,CD9,CHRNB1,CLU,DLL4,DVL1,ECT2,EGFR,EPHA2,ERBB2,FABP1,GPX2,HMGB1,HTRA2,ITGB5,KRT8,LIMS1,MET,MUC1,MYC,PDGFRA,PLAU,SCGB2A1,SLC26A3,TGFB1,TIAM1,TIMP1,TLN1,TWIST1,TYR,UGT1A9,VIL1,VIM
GO:0043067	regulation of programmed cell death	22	8.4e-05	ENSP00000218388,ENSP00000221930,ENSP00000221992,ENSP00000242261,ENSP00000245451,ENSP00000248444,ENSP00000258080,ENSP00000267101,ENSP00000275493,ENSP00000283147,ENSP00000284981,ENSP00000286827,ENSP00000295834,ENSP00000301633,ENSP00000315130,ENSP00000317272,ENSP00000345347,ENSP00000375892,ENSP00000376457,ENSP00000398632,ENSP00000479618,ENSP00000484824	AKT2,APP,BIRC5,BMP4,BMP6,CD44,CEACAM5,CLU,ECT2,EGFR,ERBB3,FABP1,HMGB1,HTRA2,MET,MUC1,MYC,TGFB1,TIAM1,TIMP1,TWIST1,VIL1
GO:0051129	negative regulation of cellular component organization	14	8.4e-05	ENSP00000221930,ENSP00000242261,ENSP00000245451,ENSP00000248444,ENSP00000258080,ENSP00000284981,ENSP00000301633,ENSP00000301945,ENSP00000315130,ENSP00000317272,ENSP00000345347,ENSP00000377536,ENSP00000386170,ENSP00000446007	ANTXR1,APP,BIRC5,BMP4,CLU,HMGB1,HTRA2,MET,PTTG1,TBX20,TGFB1,TWIST1,VIL1,VIM
GO:1905477	positive regulation of protein localization to membrane	7	8.4e-05	ENSP00000221930,ENSP00000248444,ENSP00000269571,ENSP00000275493,ENSP00000351209,ENSP00000375892,ENSP00000391490	AGR2,AKT2,EGFR,EPHA2,ERBB2,TGFB1,VIL1
GO:0032101	regulation of response to external stimulus	15	8.43e-05	ENSP00000221930,ENSP00000257290,ENSP00000275493,ENSP00000283147,ENSP00000284981,ENSP00000286827,ENSP00000315130,ENSP00000317272,ENSP00000329137,ENSP00000345347,ENSP00000355361,ENSP00000361850,ENSP00000368169,ENSP00000371958,ENSP00000377003	APP,BMP6,CD47,CD9,CLU,DVL1,EGFR,FAM132A,HMGB1,MET,PDGFRA,PLAU,TGFB1,TIAM1,TSPAN8
GO:1903827	regulation of cellular protein localization	12	9.92e-05	ENSP00000221930,ENSP00000245451,ENSP00000248444,ENSP00000255448,ENSP00000269571,ENSP00000275493,ENSP00000284981,ENSP00000351209,ENSP00000368169,ENSP00000375892,ENSP00000376457,ENSP00000391490	AGR2,AKT2,APP,BMP4,DCLK1,DVL1,ECT2,EGFR,EPHA2,ERBB2,TGFB1,VIL1
GO:0030855	epithelial cell differentiation	14	0.0001	ENSP00000167588,ENSP00000221930,ENSP00000245451,ENSP00000248444,ENSP00000283147,ENSP00000317272,ENSP00000331678,ENSP00000351209,ENSP00000355124,ENSP00000375892,ENSP00000391490,ENSP00000426809,ENSP00000446007,ENSP00000449404	AGR2,AKT2,BMP4,BMP6,EPHA2,KRT19,KRT20,KRT8,MET,PKP3,PROM1,TGFB1,VIL1,VIM
GO:0050678	regulation of epithelial cell proliferation	10	0.00011	ENSP00000221930,ENSP00000242261,ENSP00000245451,ENSP00000249749,ENSP00000269571,ENSP00000275493,ENSP00000283147,ENSP00000345347,ENSP00000372221,ENSP00000479618	BMP4,BMP6,DLL4,EGFR,ERBB2,HMGB1,MYC,SERPINB5,TGFB1,TWIST1
GO:0050679	positive regulation of epithelial cell proliferation	8	0.00011	ENSP00000221930,ENSP00000242261,ENSP00000245451,ENSP00000269571,ENSP00000275493,ENSP00000283147,ENSP00000345347,ENSP00000479618	BMP4,BMP6,EGFR,ERBB2,HMGB1,MYC,TGFB1,TWIST1
GO:0051239	regulation of multicellular organismal process	31	0.00011	ENSP00000218388,ENSP00000221930,ENSP00000242261,ENSP00000245451,ENSP00000248444,ENSP00000249749,ENSP00000257290,ENSP00000258080,ENSP00000264094,ENSP00000267101,ENSP00000269571,ENSP00000275493,ENSP00000283147,ENSP00000284981,ENSP00000286827,ENSP00000314151,ENSP00000315130,ENSP00000317272,ENSP00000345347,ENSP00000351209,ENSP00000358730,ENSP00000361850,ENSP00000368169,ENSP00000371958,ENSP00000376457…	ADORA3,APP,BMP4,BMP6,CD9,CLU,DLL4,DVL1,ECT2,EGFR,EPHA2,ERBB2,ERBB3,HMGB1,HTRA2,KLK3,LOXL3,MET,MYC,PDGFRA,PLAU,PROM1,TBX20,TGFB1,TIAM1,TIMP1,TSPAN8,TWIST1,VIL1,VIM,ZEB2
GO:0051338	regulation of transferase activity	17	0.00011	ENSP00000221930,ENSP00000245451,ENSP00000257290,ENSP00000267101,ENSP00000269571,ENSP00000275493,ENSP00000284981,ENSP00000286827,ENSP00000315130,ENSP00000345347,ENSP00000346768,ENSP00000348838,ENSP00000365851,ENSP00000368169,ENSP00000376457,ENSP00000454157,ENSP00000479618	APP,BMI1,BMP4,CLU,DVL1,ECT2,EGFR,ERBB2,ERBB3,HMGB1,MYC,PDGFRA,TGFB1,TIAM1,UBE2C,UGT1A9,ZEB2
GO:2000147	positive regulation of cell motility	12	0.00011	ENSP00000221930,ENSP00000242261,ENSP00000245451,ENSP00000248444,ENSP00000257290,ENSP00000275493,ENSP00000284981,ENSP00000286827,ENSP00000317272,ENSP00000345347,ENSP00000361850,ENSP00000375892	AKT2,APP,BMP4,EGFR,HMGB1,MET,PDGFRA,PLAU,TGFB1,TIAM1,TWIST1,VIL1
GO:0007162	negative regulation of cell adhesion	9	0.00012	ENSP00000221930,ENSP00000245451,ENSP00000263735,ENSP00000264094,ENSP00000267101,ENSP00000269571,ENSP00000345347,ENSP00000371958,ENSP00000484824	BMP4,CD9,EPCAM,ERBB2,ERBB3,HMGB1,LOXL3,MUC1,TGFB1
GO:0010033	response to organic substance	31	0.00012	ENSP00000218388,ENSP00000221930,ENSP00000242261,ENSP00000244930,ENSP00000245451,ENSP00000248444,ENSP00000249749,ENSP00000257290,ENSP00000258080,ENSP00000263321,ENSP00000269571,ENSP00000275493,ENSP00000283147,ENSP00000284981,ENSP00000286827,ENSP00000296181,ENSP00000301633,ENSP00000315130,ENSP00000316029,ENSP00000345347,ENSP00000345873,ENSP00000351209,ENSP00000371958,ENSP00000375892,ENSP00000398632…	AKT2,AOC1,APP,BIRC5,BMP4,BMP6,CD44,CD9,CLU,DLL4,EGFR,EPHA2,ERBB2,HMGB1,HTRA2,ITGB5,KRT8,LIMS1,MUC1,MYC,PDGFRA,SCGB2A1,SLC26A3,TGFB1,TIAM1,TIMP1,TLN1,TWIST1,TYR,VIL1,VIM
GO:0048518	positive regulation of biological process	47	0.00012	ENSP00000218388,ENSP00000219022,ENSP00000221930,ENSP00000242261,ENSP00000245451,ENSP00000248444,ENSP00000249749,ENSP00000257290,ENSP00000258080,ENSP00000263735,ENSP00000264094,ENSP00000266674,ENSP00000267101,ENSP00000269571,ENSP00000275493,ENSP00000283147,ENSP00000284981,ENSP00000286827,ENSP00000295834,ENSP00000301633,ENSP00000301945,ENSP00000315130,ENSP00000317272,ENSP00000329137,ENSP00000331678…	AGR2,AKT2,ANTXR1,APP,BIRC5,BMI1,BMP4,BMP6,CD44,CD47,CLU,DLL4,DVL1,ECT2,EGFR,EPCAM,EPHA2,ERBB2,ERBB3,FABP1,FAM132A,GUCA2A,HMGB1,HTRA2,LGR5,LIMS1,LOXL3,MET,MUC1,MUC13,MYC,OLFM4,PDGFRA,PKP3,PLAU,PROM1,RANBP3,RSU1,TBX20,TGFB1,TIAM1,TIMP1,TWIST1,UBE2C,VIL1,VIM,ZEB2
GO:0052548	regulation of endopeptidase activity	11	0.00012	ENSP00000218388,ENSP00000248444,ENSP00000258080,ENSP00000284981,ENSP00000295834,ENSP00000301633,ENSP00000345347,ENSP00000372221,ENSP00000377536,ENSP00000398632,ENSP00000479618	APP,BIRC5,CD44,FABP1,HMGB1,HTRA2,MYC,PTTG1,SERPINB5,TIMP1,VIL1
GO:0002576	platelet degranulation	7	0.00013	ENSP00000211998,ENSP00000218388,ENSP00000221930,ENSP00000284981,ENSP00000315130,ENSP00000316029,ENSP00000371958	APP,CD9,CLU,TGFB1,TIMP1,TLN1,VCL
GO:0043069	negative regulation of programmed cell death	16	0.00013	ENSP00000218388,ENSP00000221992,ENSP00000242261,ENSP00000245451,ENSP00000248444,ENSP00000258080,ENSP00000267101,ENSP00000275493,ENSP00000295834,ENSP00000301633,ENSP00000315130,ENSP00000317272,ENSP00000375892,ENSP00000398632,ENSP00000479618,ENSP00000484824	AKT2,BIRC5,BMP4,CD44,CEACAM5,CLU,EGFR,ERBB3,FABP1,HTRA2,MET,MUC1,MYC,TIMP1,TWIST1,VIL1
GO:0048588	developmental cell growth	6	0.00015	ENSP00000211998,ENSP00000255448,ENSP00000284981,ENSP00000286827,ENSP00000368169,ENSP00000454157	APP,DCLK1,DVL1,TIAM1,VCL,ZEB2
GO:0016043	cellular component organization	45	0.00016	ENSP00000167588,ENSP00000211998,ENSP00000218388,ENSP00000219022,ENSP00000221930,ENSP00000229922,ENSP00000248444,ENSP00000255448,ENSP00000257290,ENSP00000258080,ENSP00000260302,ENSP00000264094,ENSP00000269571,ENSP00000275493,ENSP00000284981,ENSP00000286827,ENSP00000296181,ENSP00000301633,ENSP00000301634,ENSP00000301945,ENSP00000304290,ENSP00000315130,ENSP00000316029,ENSP00000317272,ENSP00000331678…	AKT2,ANTXR1,APP,BIRC5,BMI1,CAP2,CD44,CD47,CD9,CHRNB1,CLU,DCLK1,DVL1,ECT2,EGFR,EPHA2,ERBB2,HMGB1,HTRA2,ITGB5,KRT19,KRT20,KRT8,LIMS1,LOXL3,MET,MMP13,MYC,OLFM4,PDGFRA,PKP3,PLS3,PTTG1,RANBP3,SERPINB5,TGFB1,TIAM1,TIMP1,TK1,TLN1,UBE2C,VCL,VIL1,VIM,ZEB2
GO:0045834	positive regulation of lipid metabolic process	7	0.00016	ENSP00000221930,ENSP00000242261,ENSP00000257290,ENSP00000283147,ENSP00000284981,ENSP00000295834,ENSP00000375892	AKT2,APP,BMP6,FABP1,PDGFRA,TGFB1,TWIST1
GO:0048754	branching morphogenesis of an epithelial tube	7	0.00016	ENSP00000221930,ENSP00000245451,ENSP00000249749,ENSP00000317272,ENSP00000351209,ENSP00000386170,ENSP00000479618	BMP4,DLL4,EPHA2,MET,MYC,TBX20,TGFB1
GO:0007167	enzyme linked receptor protein signaling pathway	14	0.00019	ENSP00000221930,ENSP00000245451,ENSP00000248444,ENSP00000257290,ENSP00000267101,ENSP00000269571,ENSP00000275493,ENSP00000283147,ENSP00000286827,ENSP00000296181,ENSP00000317272,ENSP00000351209,ENSP00000375892,ENSP00000446007	AKT2,BMP4,BMP6,EGFR,EPHA2,ERBB2,ERBB3,ITGB5,MET,PDGFRA,TGFB1,TIAM1,VIL1,VIM
GO:0051130	positive regulation of cellular component organization	18	0.00019	ENSP00000219022,ENSP00000221930,ENSP00000242261,ENSP00000248444,ENSP00000258080,ENSP00000284981,ENSP00000286827,ENSP00000301633,ENSP00000315130,ENSP00000317272,ENSP00000341483,ENSP00000348838,ENSP00000355361,ENSP00000368169,ENSP00000375892,ENSP00000446121,ENSP00000454157,ENSP00000484824	AKT2,APP,BIRC5,CD47,CLU,DVL1,HTRA2,LIMS1,MET,MUC1,OLFM4,RANBP3,TGFB1,TIAM1,TWIST1,UBE2C,VIL1,ZEB2
GO:0042981	regulation of apoptotic process	21	0.0002	ENSP00000218388,ENSP00000221930,ENSP00000221992,ENSP00000242261,ENSP00000245451,ENSP00000248444,ENSP00000258080,ENSP00000267101,ENSP00000275493,ENSP00000283147,ENSP00000284981,ENSP00000286827,ENSP00000295834,ENSP00000301633,ENSP00000315130,ENSP00000345347,ENSP00000375892,ENSP00000376457,ENSP00000398632,ENSP00000479618,ENSP00000484824	AKT2,APP,BIRC5,BMP4,BMP6,CD44,CEACAM5,CLU,ECT2,EGFR,ERBB3,FABP1,HMGB1,HTRA2,MUC1,MYC,TGFB1,TIAM1,TIMP1,TWIST1,VIL1
GO:0031324	negative regulation of cellular metabolic process	28	0.00022	ENSP00000218388,ENSP00000221930,ENSP00000242261,ENSP00000245451,ENSP00000248444,ENSP00000249749,ENSP00000258080,ENSP00000264094,ENSP00000283147,ENSP00000284981,ENSP00000295834,ENSP00000301633,ENSP00000315130,ENSP00000317272,ENSP00000329137,ENSP00000331678,ENSP00000345347,ENSP00000346768,ENSP00000365851,ENSP00000368169,ENSP00000372221,ENSP00000377536,ENSP00000386170,ENSP00000398632,ENSP00000446121…	APP,BIRC5,BMI1,BMP4,BMP6,CD44,CLU,DLL4,DVL1,FABP1,FAM132A,HMGB1,HTRA2,LIMS1,LOXL3,MET,MUC1,MYC,PKP3,PTTG1,SERPINB5,TBX20,TGFB1,TIMP1,TWIST1,UGT1A9,VIL1,ZEB2
GO:0012501	programmed cell death	17	0.00024	ENSP00000167588,ENSP00000221930,ENSP00000221992,ENSP00000248444,ENSP00000258080,ENSP00000267101,ENSP00000284981,ENSP00000286827,ENSP00000301633,ENSP00000315130,ENSP00000331678,ENSP00000345347,ENSP00000351209,ENSP00000355124,ENSP00000375892,ENSP00000449404,ENSP00000479618	AKT2,APP,BIRC5,CEACAM5,CLU,EPHA2,ERBB3,HMGB1,HTRA2,KRT19,KRT20,KRT8,MYC,PKP3,TGFB1,TIAM1,VIL1
GO:0031536	positive regulation of exit from mitosis	3	0.00024	ENSP00000221930,ENSP00000301633,ENSP00000348838	BIRC5,TGFB1,UBE2C
GO:0048522	positive regulation of cellular process	43	0.00024	ENSP00000218388,ENSP00000219022,ENSP00000221930,ENSP00000242261,ENSP00000245451,ENSP00000248444,ENSP00000249749,ENSP00000257290,ENSP00000258080,ENSP00000263735,ENSP00000264094,ENSP00000266674,ENSP00000267101,ENSP00000269571,ENSP00000275493,ENSP00000283147,ENSP00000284981,ENSP00000286827,ENSP00000295834,ENSP00000301633,ENSP00000301945,ENSP00000315130,ENSP00000317272,ENSP00000329137,ENSP00000341483…	AGR2,AKT2,ANTXR1,APP,BIRC5,BMI1,BMP4,BMP6,CD44,CD47,CLU,DLL4,DVL1,ECT2,EGFR,EPCAM,ERBB2,ERBB3,FABP1,FAM132A,GUCA2A,HMGB1,HTRA2,LGR5,LIMS1,LOXL3,MET,MUC1,MYC,OLFM4,PDGFRA,PLAU,PROM1,RANBP3,TBX20,TGFB1,TIAM1,TIMP1,TWIST1,UBE2C,VIL1,VIM,ZEB2
GO:0080135	regulation of cellular response to stress	13	0.00024	ENSP00000242261,ENSP00000258080,ENSP00000275493,ENSP00000284981,ENSP00000286827,ENSP00000315130,ENSP00000317272,ENSP00000345347,ENSP00000391490,ENSP00000398632,ENSP00000454157,ENSP00000479618,ENSP00000484824	AGR2,APP,CD44,CLU,EGFR,HMGB1,HTRA2,MET,MUC1,MYC,TIAM1,TWIST1,ZEB2
GO:0043281	regulation of cysteine-type endopeptidase activity involved in apoptotic process	8	0.00025	ENSP00000248444,ENSP00000258080,ENSP00000284981,ENSP00000295834,ENSP00000301633,ENSP00000345347,ENSP00000398632,ENSP00000479618	APP,BIRC5,CD44,FABP1,HMGB1,HTRA2,MYC,VIL1
GO:0048146	positive regulation of fibroblast proliferation	5	0.00025	ENSP00000221930,ENSP00000257290,ENSP00000275493,ENSP00000365851,ENSP00000479618	BMI1,EGFR,MYC,PDGFRA,TGFB1
GO:0001934	positive regulation of protein phosphorylation	16	0.00027	ENSP00000221930,ENSP00000245451,ENSP00000257290,ENSP00000267101,ENSP00000269571,ENSP00000275493,ENSP00000283147,ENSP00000284981,ENSP00000286827,ENSP00000315130,ENSP00000345347,ENSP00000368169,ENSP00000375892,ENSP00000376457,ENSP00000398632,ENSP00000454157	AKT2,APP,BMP4,BMP6,CD44,CLU,DVL1,ECT2,EGFR,ERBB2,ERBB3,HMGB1,PDGFRA,TGFB1,TIAM1,ZEB2
GO:0045937	positive regulation of phosphate metabolic process	17	0.00027	ENSP00000221930,ENSP00000245451,ENSP00000257290,ENSP00000267101,ENSP00000269571,ENSP00000275493,ENSP00000283147,ENSP00000284981,ENSP00000286827,ENSP00000315130,ENSP00000345347,ENSP00000349493,ENSP00000368169,ENSP00000375892,ENSP00000376457,ENSP00000398632,ENSP00000454157	AKT2,APP,BMP4,BMP6,CD44,CLU,DVL1,ECT2,EGFR,ERBB2,ERBB3,GUCA2A,HMGB1,PDGFRA,TGFB1,TIAM1,ZEB2
GO:0051704	multi-organism process	26	0.00028	ENSP00000221930,ENSP00000245451,ENSP00000248444,ENSP00000255448,ENSP00000257290,ENSP00000264670,ENSP00000266674,ENSP00000275493,ENSP00000284981,ENSP00000296181,ENSP00000314151,ENSP00000315130,ENSP00000316029,ENSP00000317272,ENSP00000332576,ENSP00000345873,ENSP00000351209,ENSP00000355124,ENSP00000355361,ENSP00000368169,ENSP00000371958,ENSP00000377003,ENSP00000377536,ENSP00000385706,ENSP00000446007…	APP,BMP4,CD47,CD9,CLU,DCLK1,DVL1,EGFR,EPHA2,ITGB5,KLK3,KRT19,KRT8,LGR5,MET,NSUN2,OSBP2,PDGFRA,PSG2,PTTG1,SLC26A3,TGFB1,TLN1,TSPAN8,VIL1,VIM
GO:0009893	positive regulation of metabolic process	33	0.00029	ENSP00000221930,ENSP00000242261,ENSP00000245451,ENSP00000249749,ENSP00000257290,ENSP00000258080,ENSP00000263735,ENSP00000267101,ENSP00000269571,ENSP00000275493,ENSP00000283147,ENSP00000284981,ENSP00000286827,ENSP00000295834,ENSP00000301945,ENSP00000315130,ENSP00000317272,ENSP00000331678,ENSP00000345347,ENSP00000348838,ENSP00000349493,ENSP00000365851,ENSP00000368169,ENSP00000375892,ENSP00000376457…	AGR2,AKT2,ANTXR1,APP,BMI1,BMP4,BMP6,CD44,CLU,DLL4,DVL1,ECT2,EGFR,EPCAM,ERBB2,ERBB3,FABP1,GUCA2A,HMGB1,HTRA2,LIMS1,MET,MUC1,MYC,PDGFRA,PKP3,TBX20,TGFB1,TIAM1,TWIST1,UBE2C,VIM,ZEB2
GO:0007155	cell adhesion	15	0.0003	ENSP00000211998,ENSP00000219022,ENSP00000221992,ENSP00000257290,ENSP00000263735,ENSP00000275493,ENSP00000284981,ENSP00000286827,ENSP00000296181,ENSP00000301945,ENSP00000302100,ENSP00000351209,ENSP00000355361,ENSP00000371958,ENSP00000398632	ANTXR1,APP,CD44,CD47,CD9,CEACAM5,EGFR,EPCAM,EPHA2,ITGB5,LGALS4,OLFM4,PDGFRA,TIAM1,VCL
GO:0051222	positive regulation of protein transport	10	0.0003	ENSP00000221930,ENSP00000242261,ENSP00000269571,ENSP00000275493,ENSP00000283147,ENSP00000284981,ENSP00000329137,ENSP00000345347,ENSP00000375892,ENSP00000376457	AKT2,APP,BMP6,ECT2,EGFR,ERBB2,FAM132A,HMGB1,TGFB1,TWIST1
GO:0030335	positive regulation of cell migration	11	0.00031	ENSP00000221930,ENSP00000245451,ENSP00000248444,ENSP00000257290,ENSP00000275493,ENSP00000284981,ENSP00000286827,ENSP00000317272,ENSP00000345347,ENSP00000361850,ENSP00000375892	AKT2,APP,BMP4,EGFR,HMGB1,MET,PDGFRA,PLAU,TGFB1,TIAM1,VIL1
GO:0030162	regulation of proteolysis	14	0.00032	ENSP00000218388,ENSP00000248444,ENSP00000258080,ENSP00000284981,ENSP00000295834,ENSP00000301633,ENSP00000301945,ENSP00000315130,ENSP00000345347,ENSP00000368169,ENSP00000372221,ENSP00000377536,ENSP00000398632,ENSP00000479618	ANTXR1,APP,BIRC5,CD44,CLU,DVL1,FABP1,HMGB1,HTRA2,MYC,PTTG1,SERPINB5,TIMP1,VIL1
GO:0022603	regulation of anatomical structure morphogenesis	16	0.00033	ENSP00000219022,ENSP00000221930,ENSP00000242261,ENSP00000245451,ENSP00000248444,ENSP00000249749,ENSP00000269571,ENSP00000286827,ENSP00000314151,ENSP00000345347,ENSP00000351209,ENSP00000368169,ENSP00000398632,ENSP00000446121,ENSP00000454157,ENSP00000479618	BMP4,CD44,DLL4,DVL1,EPHA2,ERBB2,HMGB1,KLK3,LIMS1,MYC,OLFM4,TGFB1,TIAM1,TWIST1,VIL1,ZEB2
GO:0043010	camera-type eye development	9	0.00033	ENSP00000221930,ENSP00000242261,ENSP00000245451,ENSP00000257290,ENSP00000275493,ENSP00000293599,ENSP00000351209,ENSP00000426809,ENSP00000446007	AQP5,BMP4,EGFR,EPHA2,PDGFRA,PROM1,TGFB1,TWIST1,VIM
GO:0022408	negative regulation of cell-cell adhesion	7	0.00035	ENSP00000221930,ENSP00000245451,ENSP00000263735,ENSP00000264094,ENSP00000269571,ENSP00000345347,ENSP00000371958	BMP4,CD9,EPCAM,ERBB2,HMGB1,LOXL3,TGFB1
GO:0033674	positive regulation of kinase activity	12	0.00035	ENSP00000221930,ENSP00000245451,ENSP00000257290,ENSP00000267101,ENSP00000269571,ENSP00000275493,ENSP00000284981,ENSP00000286827,ENSP00000315130,ENSP00000345347,ENSP00000376457,ENSP00000454157	APP,BMP4,CLU,ECT2,EGFR,ERBB2,ERBB3,HMGB1,PDGFRA,TGFB1,TIAM1,ZEB2
GO:0043066	negative regulation of apoptotic process	15	0.00035	ENSP00000218388,ENSP00000221992,ENSP00000242261,ENSP00000245451,ENSP00000248444,ENSP00000258080,ENSP00000267101,ENSP00000275493,ENSP00000295834,ENSP00000301633,ENSP00000315130,ENSP00000375892,ENSP00000398632,ENSP00000479618,ENSP00000484824	AKT2,BIRC5,BMP4,CD44,CEACAM5,CLU,EGFR,ERBB3,FABP1,HTRA2,MUC1,MYC,TIMP1,TWIST1,VIL1
GO:0001655	urogenital system development	9	0.00037	ENSP00000221930,ENSP00000245451,ENSP00000257290,ENSP00000263735,ENSP00000266674,ENSP00000283147,ENSP00000372221,ENSP00000426809,ENSP00000479618	BMP4,BMP6,EPCAM,LGR5,MYC,PDGFRA,PROM1,SERPINB5,TGFB1
GO:0009887	animal organ morphogenesis	15	0.00037	ENSP00000221930,ENSP00000242261,ENSP00000245451,ENSP00000249749,ENSP00000257290,ENSP00000260302,ENSP00000275493,ENSP00000283147,ENSP00000293599,ENSP00000351209,ENSP00000368169,ENSP00000372221,ENSP00000386170,ENSP00000426809,ENSP00000479618	AQP5,BMP4,BMP6,DLL4,DVL1,EGFR,EPHA2,MMP13,MYC,PDGFRA,PROM1,SERPINB5,TBX20,TGFB1,TWIST1
GO:0048668	collateral sprouting	3	0.00039	ENSP00000284981,ENSP00000368169,ENSP00000454157	APP,DVL1,ZEB2
GO:0051241	negative regulation of multicellular organismal process	17	0.00039	ENSP00000218388,ENSP00000221930,ENSP00000242261,ENSP00000245451,ENSP00000249749,ENSP00000257290,ENSP00000264094,ENSP00000269571,ENSP00000275493,ENSP00000284981,ENSP00000314151,ENSP00000345347,ENSP00000361850,ENSP00000371958,ENSP00000377003,ENSP00000446007,ENSP00000479618	APP,BMP4,CD9,DLL4,EGFR,ERBB2,HMGB1,KLK3,LOXL3,MYC,PDGFRA,PLAU,TGFB1,TIMP1,TSPAN8,TWIST1,VIM
GO:1903800	positive regulation of production of miRNAs involved in gene silencing by miRNA	3	0.00039	ENSP00000221930,ENSP00000245451,ENSP00000275493	BMP4,EGFR,TGFB1
GO:0060341	regulation of cellular localization	14	0.0004	ENSP00000221930,ENSP00000245451,ENSP00000248444,ENSP00000255448,ENSP00000269571,ENSP00000275493,ENSP00000284981,ENSP00000286827,ENSP00000329137,ENSP00000351209,ENSP00000368169,ENSP00000375892,ENSP00000376457,ENSP00000391490	AGR2,AKT2,APP,BMP4,DCLK1,DVL1,ECT2,EGFR,EPHA2,ERBB2,FAM132A,TGFB1,TIAM1,VIL1
GO:0009719	response to endogenous stimulus	19	0.00043	ENSP00000218388,ENSP00000221930,ENSP00000244930,ENSP00000245451,ENSP00000248444,ENSP00000249749,ENSP00000257290,ENSP00000269571,ENSP00000275493,ENSP00000283147,ENSP00000284981,ENSP00000296181,ENSP00000345347,ENSP00000345873,ENSP00000371958,ENSP00000375892,ENSP00000398632,ENSP00000411613,ENSP00000446121	AKT2,AOC1,APP,BMP4,BMP6,CD44,CD9,DLL4,EGFR,ERBB2,HMGB1,ITGB5,LIMS1,PDGFRA,SCGB2A1,SLC26A3,TGFB1,TIMP1,VIL1
GO:0031399	regulation of protein modification process	22	0.00045	ENSP00000221930,ENSP00000242261,ENSP00000245451,ENSP00000257290,ENSP00000267101,ENSP00000269571,ENSP00000275493,ENSP00000283147,ENSP00000284981,ENSP00000286827,ENSP00000315130,ENSP00000345347,ENSP00000348838,ENSP00000351209,ENSP00000365851,ENSP00000368169,ENSP00000375892,ENSP00000376457,ENSP00000398632,ENSP00000454157,ENSP00000479618,ENSP00000484824	AKT2,APP,BMI1,BMP4,BMP6,CD44,CLU,DVL1,ECT2,EGFR,EPHA2,ERBB2,ERBB3,HMGB1,MUC1,MYC,PDGFRA,TGFB1,TIAM1,TWIST1,UBE2C,ZEB2
GO:0008283	cell population proliferation	13	0.00047	ENSP00000221930,ENSP00000242261,ENSP00000245451,ENSP00000263321,ENSP00000266674,ENSP00000269571,ENSP00000275493,ENSP00000315130,ENSP00000317272,ENSP00000345347,ENSP00000351209,ENSP00000386170,ENSP00000454157	BMP4,CLU,EGFR,EPHA2,ERBB2,HMGB1,LGR5,MET,TBX20,TGFB1,TWIST1,TYR,ZEB2
GO:0009892	negative regulation of metabolic process	29	0.00048	ENSP00000218388,ENSP00000221930,ENSP00000242261,ENSP00000245451,ENSP00000248444,ENSP00000249749,ENSP00000258080,ENSP00000264094,ENSP00000275493,ENSP00000283147,ENSP00000284981,ENSP00000295834,ENSP00000301633,ENSP00000315130,ENSP00000317272,ENSP00000329137,ENSP00000331678,ENSP00000345347,ENSP00000346768,ENSP00000365851,ENSP00000368169,ENSP00000372221,ENSP00000377536,ENSP00000386170,ENSP00000398632…	APP,BIRC5,BMI1,BMP4,BMP6,CD44,CLU,DLL4,DVL1,EGFR,FABP1,FAM132A,HMGB1,HTRA2,LIMS1,LOXL3,MET,MUC1,MYC,PKP3,PTTG1,SERPINB5,TBX20,TGFB1,TIMP1,TWIST1,UGT1A9,VIL1,ZEB2
GO:0032000	positive regulation of fatty acid beta-oxidation	3	0.00048	ENSP00000242261,ENSP00000295834,ENSP00000375892	AKT2,FABP1,TWIST1
GO:0060363	cranial suture morphogenesis	3	0.00048	ENSP00000221930,ENSP00000242261,ENSP00000245451	BMP4,TGFB1,TWIST1
GO:0001932	regulation of protein phosphorylation	19	0.00049	ENSP00000221930,ENSP00000242261,ENSP00000245451,ENSP00000257290,ENSP00000267101,ENSP00000269571,ENSP00000275493,ENSP00000283147,ENSP00000284981,ENSP00000286827,ENSP00000315130,ENSP00000345347,ENSP00000351209,ENSP00000368169,ENSP00000375892,ENSP00000376457,ENSP00000398632,ENSP00000454157,ENSP00000479618	AKT2,APP,BMP4,BMP6,CD44,CLU,DVL1,ECT2,EGFR,EPHA2,ERBB2,ERBB3,HMGB1,MYC,PDGFRA,TGFB1,TIAM1,TWIST1,ZEB2
GO:0010604	positive regulation of macromolecule metabolic process	31	0.00049	ENSP00000221930,ENSP00000242261,ENSP00000245451,ENSP00000249749,ENSP00000257290,ENSP00000258080,ENSP00000263735,ENSP00000267101,ENSP00000269571,ENSP00000275493,ENSP00000283147,ENSP00000284981,ENSP00000286827,ENSP00000301945,ENSP00000315130,ENSP00000317272,ENSP00000331678,ENSP00000345347,ENSP00000348838,ENSP00000365851,ENSP00000368169,ENSP00000375892,ENSP00000376457,ENSP00000386170,ENSP00000391490…	AGR2,AKT2,ANTXR1,APP,BMI1,BMP4,BMP6,CD44,CLU,DLL4,DVL1,ECT2,EGFR,EPCAM,ERBB2,ERBB3,HMGB1,HTRA2,LIMS1,MET,MUC1,MYC,PDGFRA,PKP3,TBX20,TGFB1,TIAM1,TWIST1,UBE2C,VIM,ZEB2
GO:0051099	positive regulation of binding	7	0.00049	ENSP00000221930,ENSP00000242261,ENSP00000245451,ENSP00000284981,ENSP00000286827,ENSP00000317272,ENSP00000345347	APP,BMP4,HMGB1,MET,TGFB1,TIAM1,TWIST1
GO:1902531	regulation of intracellular signal transduction	22	0.00049	ENSP00000221930,ENSP00000242261,ENSP00000245451,ENSP00000257290,ENSP00000258080,ENSP00000267101,ENSP00000269571,ENSP00000275493,ENSP00000283147,ENSP00000284981,ENSP00000286827,ENSP00000315130,ENSP00000317272,ENSP00000329137,ENSP00000345347,ENSP00000351209,ENSP00000376457,ENSP00000398632,ENSP00000446121,ENSP00000454157,ENSP00000479618,ENSP00000484824	APP,BMP4,BMP6,CD44,CLU,ECT2,EGFR,EPHA2,ERBB2,ERBB3,FAM132A,HMGB1,HTRA2,LIMS1,MET,MUC1,MYC,PDGFRA,TGFB1,TIAM1,TWIST1,ZEB2
GO:0010648	negative regulation of cell communication	18	0.00052	ENSP00000221930,ENSP00000242261,ENSP00000245451,ENSP00000249749,ENSP00000258080,ENSP00000267101,ENSP00000269571,ENSP00000275493,ENSP00000284981,ENSP00000315130,ENSP00000317272,ENSP00000351209,ENSP00000351632,ENSP00000368169,ENSP00000386170,ENSP00000398632,ENSP00000479618,ENSP00000484824	APP,BMP4,CD44,CLU,DLL4,DVL1,EGFR,EPHA2,ERBB2,ERBB3,FAM3D,HTRA2,MET,MUC1,MYC,TBX20,TGFB1,TWIST1
GO:0010951	negative regulation of endopeptidase activity	8	0.00052	ENSP00000218388,ENSP00000248444,ENSP00000284981,ENSP00000295834,ENSP00000301633,ENSP00000372221,ENSP00000377536,ENSP00000398632	APP,BIRC5,CD44,FABP1,PTTG1,SERPINB5,TIMP1,VIL1
GO:0023057	negative regulation of signaling	18	0.00053	ENSP00000221930,ENSP00000242261,ENSP00000245451,ENSP00000249749,ENSP00000258080,ENSP00000267101,ENSP00000269571,ENSP00000275493,ENSP00000284981,ENSP00000315130,ENSP00000317272,ENSP00000351209,ENSP00000351632,ENSP00000368169,ENSP00000386170,ENSP00000398632,ENSP00000479618,ENSP00000484824	APP,BMP4,CD44,CLU,DLL4,DVL1,EGFR,EPHA2,ERBB2,ERBB3,FAM3D,HTRA2,MET,MUC1,MYC,TBX20,TGFB1,TWIST1
GO:0045055	regulated exocytosis	13	0.00054	ENSP00000211998,ENSP00000218388,ENSP00000219022,ENSP00000221930,ENSP00000284981,ENSP00000315130,ENSP00000316029,ENSP00000345347,ENSP00000355361,ENSP00000361850,ENSP00000371958,ENSP00000398632,ENSP00000411613	AOC1,APP,CD44,CD47,CD9,CLU,HMGB1,OLFM4,PLAU,TGFB1,TIMP1,TLN1,VCL
GO:0050866	negative regulation of cell activation	7	0.00055	ENSP00000221930,ENSP00000245451,ENSP00000257290,ENSP00000264094,ENSP00000269571,ENSP00000345347,ENSP00000371958	BMP4,CD9,ERBB2,HMGB1,LOXL3,PDGFRA,TGFB1
GO:0006915	apoptotic process	15	0.00059	ENSP00000167588,ENSP00000221930,ENSP00000221992,ENSP00000248444,ENSP00000258080,ENSP00000267101,ENSP00000284981,ENSP00000286827,ENSP00000301633,ENSP00000315130,ENSP00000345347,ENSP00000351209,ENSP00000375892,ENSP00000449404,ENSP00000479618	AKT2,APP,BIRC5,CEACAM5,CLU,EPHA2,ERBB3,HMGB1,HTRA2,KRT20,KRT8,MYC,TGFB1,TIAM1,VIL1
GO:0071310	cellular response to organic substance	25	0.00062	ENSP00000218388,ENSP00000221930,ENSP00000242261,ENSP00000244930,ENSP00000245451,ENSP00000248444,ENSP00000249749,ENSP00000257290,ENSP00000258080,ENSP00000269571,ENSP00000275493,ENSP00000283147,ENSP00000284981,ENSP00000296181,ENSP00000301633,ENSP00000316029,ENSP00000345873,ENSP00000375892,ENSP00000398632,ENSP00000411613,ENSP00000446007,ENSP00000446121,ENSP00000449404,ENSP00000479618,ENSP00000484824	AKT2,AOC1,APP,BIRC5,BMP4,BMP6,CD44,DLL4,EGFR,ERBB2,HTRA2,ITGB5,KRT8,LIMS1,MUC1,MYC,PDGFRA,SCGB2A1,SLC26A3,TGFB1,TIMP1,TLN1,TWIST1,VIL1,VIM
GO:0033043	regulation of organelle organization	17	0.00063	ENSP00000221930,ENSP00000242261,ENSP00000245451,ENSP00000248444,ENSP00000257290,ENSP00000258080,ENSP00000284981,ENSP00000301633,ENSP00000315130,ENSP00000317272,ENSP00000341483,ENSP00000348838,ENSP00000375892,ENSP00000377536,ENSP00000454157,ENSP00000479618,ENSP00000484824	AKT2,APP,BIRC5,BMP4,CLU,HTRA2,MET,MUC1,MYC,PDGFRA,PTTG1,RANBP3,TGFB1,TWIST1,UBE2C,VIL1,ZEB2
GO:0038127	ERBB signaling pathway	5	0.00064	ENSP00000221930,ENSP00000248444,ENSP00000267101,ENSP00000269571,ENSP00000275493	EGFR,ERBB2,ERBB3,TGFB1,VIL1
GO:0009968	negative regulation of signal transduction	17	0.00065	ENSP00000221930,ENSP00000242261,ENSP00000245451,ENSP00000249749,ENSP00000258080,ENSP00000267101,ENSP00000269571,ENSP00000275493,ENSP00000284981,ENSP00000315130,ENSP00000317272,ENSP00000351209,ENSP00000368169,ENSP00000386170,ENSP00000398632,ENSP00000479618,ENSP00000484824	APP,BMP4,CD44,CLU,DLL4,DVL1,EGFR,EPHA2,ERBB2,ERBB3,HTRA2,MET,MUC1,MYC,TBX20,TGFB1,TWIST1
GO:0051094	positive regulation of developmental process	18	0.00067	ENSP00000219022,ENSP00000221930,ENSP00000242261,ENSP00000245451,ENSP00000248444,ENSP00000267101,ENSP00000283147,ENSP00000284981,ENSP00000286827,ENSP00000345347,ENSP00000368169,ENSP00000376457,ENSP00000386170,ENSP00000391490,ENSP00000426809,ENSP00000446121,ENSP00000454157,ENSP00000479618	AGR2,APP,BMP4,BMP6,DVL1,ECT2,ERBB3,HMGB1,LIMS1,MYC,OLFM4,PROM1,TBX20,TGFB1,TIAM1,TWIST1,VIL1,ZEB2
GO:0062012	regulation of small molecule metabolic process	9	0.00067	ENSP00000221930,ENSP00000242261,ENSP00000283147,ENSP00000295834,ENSP00000329137,ENSP00000345347,ENSP00000346768,ENSP00000349493,ENSP00000375892	AKT2,BMP6,FABP1,FAM132A,GUCA2A,HMGB1,TGFB1,TWIST1,UGT1A9
GO:0010639	negative regulation of organelle organization	9	0.00068	ENSP00000242261,ENSP00000245451,ENSP00000248444,ENSP00000258080,ENSP00000284981,ENSP00000301633,ENSP00000315130,ENSP00000317272,ENSP00000377536	APP,BIRC5,BMP4,CLU,HTRA2,MET,PTTG1,TWIST1,VIL1
GO:0061041	regulation of wound healing	6	0.00068	ENSP00000248444,ENSP00000257290,ENSP00000345347,ENSP00000361850,ENSP00000371958,ENSP00000377003	CD9,HMGB1,PDGFRA,PLAU,TSPAN8,VIL1
GO:0043408	regulation of MAPK cascade	13	0.00069	ENSP00000221930,ENSP00000245451,ENSP00000257290,ENSP00000269571,ENSP00000275493,ENSP00000283147,ENSP00000284981,ENSP00000286827,ENSP00000345347,ENSP00000351209,ENSP00000398632,ENSP00000454157,ENSP00000479618	APP,BMP4,BMP6,CD44,EGFR,EPHA2,ERBB2,HMGB1,MYC,PDGFRA,TGFB1,TIAM1,ZEB2
GO:0048699	generation of neurons	19	0.00071	ENSP00000211998,ENSP00000221930,ENSP00000242261,ENSP00000245451,ENSP00000249749,ENSP00000255448,ENSP00000258080,ENSP00000269571,ENSP00000275493,ENSP00000283147,ENSP00000284981,ENSP00000286827,ENSP00000345347,ENSP00000368169,ENSP00000376457,ENSP00000386170,ENSP00000426809,ENSP00000446007,ENSP00000454157	APP,BMP4,BMP6,DCLK1,DLL4,DVL1,ECT2,EGFR,ERBB2,HMGB1,HTRA2,PROM1,TBX20,TGFB1,TIAM1,TWIST1,VCL,VIM,ZEB2
GO:0060485	mesenchyme development	7	0.00072	ENSP00000221930,ENSP00000242261,ENSP00000245451,ENSP00000264094,ENSP00000267101,ENSP00000386170,ENSP00000454157	BMP4,ERBB3,LOXL3,TBX20,TGFB1,TWIST1,ZEB2
GO:0010628	positive regulation of gene expression	22	0.00073	ENSP00000221930,ENSP00000242261,ENSP00000245451,ENSP00000249749,ENSP00000263735,ENSP00000267101,ENSP00000269571,ENSP00000275493,ENSP00000283147,ENSP00000284981,ENSP00000315130,ENSP00000317272,ENSP00000331678,ENSP00000345347,ENSP00000368169,ENSP00000386170,ENSP00000391490,ENSP00000446007,ENSP00000446121,ENSP00000454157,ENSP00000479618,ENSP00000484824	AGR2,APP,BMP4,BMP6,CLU,DLL4,DVL1,EGFR,EPCAM,ERBB2,ERBB3,HMGB1,LIMS1,MET,MUC1,MYC,PKP3,TBX20,TGFB1,TWIST1,VIM,ZEB2
GO:0045860	positive regulation of protein kinase activity	11	0.00073	ENSP00000221930,ENSP00000245451,ENSP00000267101,ENSP00000269571,ENSP00000275493,ENSP00000284981,ENSP00000286827,ENSP00000315130,ENSP00000345347,ENSP00000376457,ENSP00000454157	APP,BMP4,CLU,ECT2,EGFR,ERBB2,ERBB3,HMGB1,TGFB1,TIAM1,ZEB2
GO:2001020	regulation of response to DNA damage stimulus	7	0.00073	ENSP00000242261,ENSP00000275493,ENSP00000315130,ENSP00000345347,ENSP00000398632,ENSP00000479618,ENSP00000484824	CD44,CLU,EGFR,HMGB1,MUC1,MYC,TWIST1
GO:0007043	cell-cell junction assembly	5	0.00075	ENSP00000211998,ENSP00000316029,ENSP00000331678,ENSP00000371958,ENSP00000376457	CD9,ECT2,PKP3,TLN1,VCL
GO:0045595	regulation of cell differentiation	21	0.00075	ENSP00000219022,ENSP00000221930,ENSP00000221992,ENSP00000242261,ENSP00000245451,ENSP00000249749,ENSP00000257290,ENSP00000264094,ENSP00000269571,ENSP00000275493,ENSP00000283147,ENSP00000284981,ENSP00000286827,ENSP00000345347,ENSP00000368169,ENSP00000376457,ENSP00000426809,ENSP00000446007,ENSP00000446121,ENSP00000454157,ENSP00000479618	APP,BMP4,BMP6,CEACAM5,DLL4,DVL1,ECT2,EGFR,ERBB2,HMGB1,LIMS1,LOXL3,MYC,OLFM4,PDGFRA,PROM1,TGFB1,TIAM1,TWIST1,VIM,ZEB2
GO:0048589	developmental growth	9	0.00075	ENSP00000211998,ENSP00000221930,ENSP00000245451,ENSP00000255448,ENSP00000260302,ENSP00000284981,ENSP00000286827,ENSP00000368169,ENSP00000454157	APP,BMP4,DCLK1,DVL1,MMP13,TGFB1,TIAM1,VCL,ZEB2
GO:0048646	anatomical structure formation involved in morphogenesis	14	0.00076	ENSP00000221930,ENSP00000242261,ENSP00000245451,ENSP00000249749,ENSP00000257290,ENSP00000296181,ENSP00000351209,ENSP00000355124,ENSP00000368169,ENSP00000371958,ENSP00000386170,ENSP00000426809,ENSP00000449404,ENSP00000454157	BMP4,CD9,DLL4,DVL1,EPHA2,ITGB5,KRT19,KRT8,PDGFRA,PROM1,TBX20,TGFB1,TWIST1,ZEB2
GO:0003006	developmental process involved in reproduction	12	0.00079	ENSP00000221930,ENSP00000245451,ENSP00000257290,ENSP00000264670,ENSP00000266674,ENSP00000275493,ENSP00000283147,ENSP00000332576,ENSP00000345873,ENSP00000355124,ENSP00000372221,ENSP00000449404	BMP4,BMP6,EGFR,KRT19,KRT8,LGR5,NSUN2,OSBP2,PDGFRA,SERPINB5,SLC26A3,TGFB1
GO:0062013	positive regulation of small molecule metabolic process	6	0.00079	ENSP00000242261,ENSP00000283147,ENSP00000295834,ENSP00000345347,ENSP00000349493,ENSP00000375892	AKT2,BMP6,FABP1,GUCA2A,HMGB1,TWIST1
GO:0046903	secretion	16	0.00083	ENSP00000211998,ENSP00000218388,ENSP00000219022,ENSP00000221930,ENSP00000284981,ENSP00000293599,ENSP00000315130,ENSP00000316029,ENSP00000345347,ENSP00000355361,ENSP00000361850,ENSP00000368169,ENSP00000371958,ENSP00000391490,ENSP00000398632,ENSP00000411613	AGR2,AOC1,APP,AQP5,CD44,CD47,CD9,CLU,DVL1,HMGB1,OLFM4,PLAU,TGFB1,TIMP1,TLN1,VCL
GO:0072001	renal system development	8	0.00086	ENSP00000221930,ENSP00000245451,ENSP00000257290,ENSP00000263735,ENSP00000266674,ENSP00000283147,ENSP00000426809,ENSP00000479618	BMP4,BMP6,EPCAM,LGR5,MYC,PDGFRA,PROM1,TGFB1
GO:1902533	positive regulation of intracellular signal transduction	15	0.00088	ENSP00000221930,ENSP00000245451,ENSP00000257290,ENSP00000267101,ENSP00000269571,ENSP00000275493,ENSP00000284981,ENSP00000286827,ENSP00000315130,ENSP00000317272,ENSP00000329137,ENSP00000345347,ENSP00000398632,ENSP00000446121,ENSP00000454157	APP,BMP4,CD44,CLU,EGFR,ERBB2,ERBB3,FAM132A,HMGB1,LIMS1,MET,PDGFRA,TGFB1,TIAM1,ZEB2
GO:0070374	positive regulation of ERK1 and ERK2 cascade	7	0.00089	ENSP00000221930,ENSP00000245451,ENSP00000257290,ENSP00000275493,ENSP00000284981,ENSP00000345347,ENSP00000398632	APP,BMP4,CD44,EGFR,HMGB1,PDGFRA,TGFB1
GO:0034330	cell junction organization	7	0.00091	ENSP00000211998,ENSP00000221930,ENSP00000316029,ENSP00000331678,ENSP00000371958,ENSP00000376457,ENSP00000446121	CD9,ECT2,LIMS1,PKP3,TGFB1,TLN1,VCL
GO:0034329	cell junction assembly	6	0.00096	ENSP00000211998,ENSP00000316029,ENSP00000331678,ENSP00000371958,ENSP00000376457,ENSP00000446121	CD9,ECT2,LIMS1,PKP3,TLN1,VCL
GO:0060391	positive regulation of SMAD protein signal transduction	3	0.00096	ENSP00000221930,ENSP00000245451,ENSP00000283147	BMP4,BMP6,TGFB1
GO:0090184	positive regulation of kidney development	4	0.00096	ENSP00000221930,ENSP00000245451,ENSP00000426809,ENSP00000479618	BMP4,MYC,PROM1,TGFB1
GO:0007417	central nervous system development	14	0.001	ENSP00000221930,ENSP00000245451,ENSP00000249749,ENSP00000255448,ENSP00000258080,ENSP00000264094,ENSP00000269571,ENSP00000275493,ENSP00000284981,ENSP00000315130,ENSP00000371958,ENSP00000386170,ENSP00000446007,ENSP00000454157	APP,BMP4,CD9,CLU,DCLK1,DLL4,EGFR,ERBB2,HTRA2,LOXL3,TBX20,TGFB1,VIM,ZEB2
GO:0045581	negative regulation of T cell differentiation	4	0.001	ENSP00000245451,ENSP00000264094,ENSP00000269571,ENSP00000345347	BMP4,ERBB2,HMGB1,LOXL3
GO:0051172	negative regulation of nitrogen compound metabolic process	25	0.001	ENSP00000218388,ENSP00000221930,ENSP00000242261,ENSP00000245451,ENSP00000248444,ENSP00000249749,ENSP00000264094,ENSP00000275493,ENSP00000283147,ENSP00000284981,ENSP00000295834,ENSP00000301633,ENSP00000315130,ENSP00000331678,ENSP00000345347,ENSP00000365851,ENSP00000368169,ENSP00000372221,ENSP00000377536,ENSP00000386170,ENSP00000398632,ENSP00000446121,ENSP00000454157,ENSP00000479618,ENSP00000484824	APP,BIRC5,BMI1,BMP4,BMP6,CD44,CLU,DLL4,DVL1,EGFR,FABP1,HMGB1,LIMS1,LOXL3,MUC1,MYC,PKP3,PTTG1,SERPINB5,TBX20,TGFB1,TIMP1,TWIST1,VIL1,ZEB2
GO:2000026	regulation of multicellular organismal development	22	0.001	ENSP00000218388,ENSP00000221930,ENSP00000242261,ENSP00000245451,ENSP00000249749,ENSP00000264094,ENSP00000267101,ENSP00000269571,ENSP00000275493,ENSP00000283147,ENSP00000284981,ENSP00000286827,ENSP00000314151,ENSP00000345347,ENSP00000351209,ENSP00000368169,ENSP00000376457,ENSP00000386170,ENSP00000426809,ENSP00000446007,ENSP00000454157,ENSP00000479618	APP,BMP4,BMP6,DLL4,DVL1,ECT2,EGFR,EPHA2,ERBB2,ERBB3,HMGB1,KLK3,LOXL3,MYC,PROM1,TBX20,TGFB1,TIAM1,TIMP1,TWIST1,VIM,ZEB2
GO:0001843	neural tube closure	5	0.0011	ENSP00000221930,ENSP00000242261,ENSP00000245451,ENSP00000368169,ENSP00000454157	BMP4,DVL1,TGFB1,TWIST1,ZEB2
GO:0003197	endocardial cushion development	4	0.0011	ENSP00000242261,ENSP00000245451,ENSP00000267101,ENSP00000386170	BMP4,ERBB3,TBX20,TWIST1
GO:0006950	response to stress	31	0.0011	ENSP00000167588,ENSP00000218388,ENSP00000221930,ENSP00000242261,ENSP00000257290,ENSP00000258080,ENSP00000264094,ENSP00000267101,ENSP00000269571,ENSP00000275493,ENSP00000283147,ENSP00000284981,ENSP00000295834,ENSP00000314151,ENSP00000315130,ENSP00000316029,ENSP00000345347,ENSP00000351209,ENSP00000358730,ENSP00000361850,ENSP00000371958,ENSP00000374265,ENSP00000376457,ENSP00000377536,ENSP00000398632…	ADORA3,AOC1,APP,BMP6,CD44,CD9,CLU,ECT2,EGFR,EPHA2,ERBB2,ERBB3,FABP1,GPX2,HMGB1,HTRA2,KLK3,KRT20,KRT8,LOXL3,MUC1,MYC,PDGFRA,PLAU,PTTG1,TFF3,TGFB1,TIMP1,TLN1,TWIST1,VIM
GO:0009611	response to wounding	11	0.0011	ENSP00000218388,ENSP00000221930,ENSP00000257290,ENSP00000267101,ENSP00000269571,ENSP00000275493,ENSP00000358730,ENSP00000361850,ENSP00000371958,ENSP00000398632,ENSP00000430690	ADORA3,CD44,CD9,EGFR,ERBB2,ERBB3,PDGFRA,PLAU,TFF3,TGFB1,TIMP1
GO:0022407	regulation of cell-cell adhesion	9	0.0011	ENSP00000221930,ENSP00000245451,ENSP00000263735,ENSP00000264094,ENSP00000269571,ENSP00000345347,ENSP00000355361,ENSP00000371958,ENSP00000398632	BMP4,CD44,CD47,CD9,EPCAM,ERBB2,HMGB1,LOXL3,TGFB1
GO:0022414	reproductive process	18	0.0011	ENSP00000221930,ENSP00000245451,ENSP00000257290,ENSP00000264670,ENSP00000266674,ENSP00000275493,ENSP00000283147,ENSP00000284981,ENSP00000301945,ENSP00000332576,ENSP00000345873,ENSP00000355124,ENSP00000371958,ENSP00000372221,ENSP00000377003,ENSP00000377536,ENSP00000385706,ENSP00000449404	ANTXR1,APP,BMP4,BMP6,CD9,EGFR,KRT19,KRT8,LGR5,NSUN2,OSBP2,PDGFRA,PSG2,PTTG1,SERPINB5,SLC26A3,TGFB1,TSPAN8
GO:0050918	positive chemotaxis	4	0.0011	ENSP00000245451,ENSP00000284981,ENSP00000317272,ENSP00000345347	APP,BMP4,HMGB1,MET
GO:0055025	positive regulation of cardiac muscle tissue development	4	0.0011	ENSP00000221930,ENSP00000245451,ENSP00000267101,ENSP00000386170	BMP4,ERBB3,TBX20,TGFB1
GO:0060349	bone morphogenesis	5	0.0011	ENSP00000221930,ENSP00000242261,ENSP00000245451,ENSP00000260302,ENSP00000283147	BMP4,BMP6,MMP13,TGFB1,TWIST1
GO:0071495	cellular response to endogenous stimulus	16	0.0011	ENSP00000221930,ENSP00000244930,ENSP00000245451,ENSP00000248444,ENSP00000249749,ENSP00000257290,ENSP00000269571,ENSP00000275493,ENSP00000283147,ENSP00000284981,ENSP00000296181,ENSP00000345873,ENSP00000375892,ENSP00000398632,ENSP00000411613,ENSP00000446121	AKT2,AOC1,APP,BMP4,BMP6,CD44,DLL4,EGFR,ERBB2,ITGB5,LIMS1,PDGFRA,SCGB2A1,SLC26A3,TGFB1,VIL1
GO:0007399	nervous system development	24	0.0012	ENSP00000211998,ENSP00000221930,ENSP00000242261,ENSP00000245451,ENSP00000249749,ENSP00000255448,ENSP00000258080,ENSP00000264094,ENSP00000267101,ENSP00000269571,ENSP00000275493,ENSP00000283147,ENSP00000284981,ENSP00000286827,ENSP00000315130,ENSP00000345347,ENSP00000368169,ENSP00000371958,ENSP00000375892,ENSP00000376457,ENSP00000386170,ENSP00000426809,ENSP00000446007,ENSP00000454157	AKT2,APP,BMP4,BMP6,CD9,CLU,DCLK1,DLL4,DVL1,ECT2,EGFR,ERBB2,ERBB3,HMGB1,HTRA2,LOXL3,PROM1,TBX20,TGFB1,TIAM1,TWIST1,VCL,VIM,ZEB2
GO:0010632	regulation of epithelial cell migration	7	0.0012	ENSP00000221930,ENSP00000245451,ENSP00000248444,ENSP00000249749,ENSP00000317272,ENSP00000345347,ENSP00000351209	BMP4,DLL4,EPHA2,HMGB1,MET,TGFB1,VIL1
GO:0042060	wound healing	10	0.0012	ENSP00000218388,ENSP00000221930,ENSP00000257290,ENSP00000267101,ENSP00000269571,ENSP00000275493,ENSP00000361850,ENSP00000371958,ENSP00000398632,ENSP00000430690	CD44,CD9,EGFR,ERBB2,ERBB3,PDGFRA,PLAU,TFF3,TGFB1,TIMP1
GO:1903076	regulation of protein localization to plasma membrane	5	0.0012	ENSP00000221930,ENSP00000248444,ENSP00000275493,ENSP00000351209,ENSP00000391490	AGR2,EGFR,EPHA2,TGFB1,VIL1
GO:1903829	positive regulation of cellular protein localization	8	0.0012	ENSP00000221930,ENSP00000248444,ENSP00000269571,ENSP00000275493,ENSP00000351209,ENSP00000375892,ENSP00000376457,ENSP00000391490	AGR2,AKT2,ECT2,EGFR,EPHA2,ERBB2,TGFB1,VIL1
GO:0001503	ossification	7	0.0013	ENSP00000221930,ENSP00000242261,ENSP00000245451,ENSP00000260302,ENSP00000275493,ENSP00000283147,ENSP00000351209	BMP4,BMP6,EGFR,EPHA2,MMP13,TGFB1,TWIST1
GO:0010718	positive regulation of epithelial to mesenchymal transition	4	0.0013	ENSP00000221930,ENSP00000242261,ENSP00000245451,ENSP00000286827	BMP4,TGFB1,TIAM1,TWIST1
GO:0032103	positive regulation of response to external stimulus	8	0.0013	ENSP00000221930,ENSP00000275493,ENSP00000283147,ENSP00000284981,ENSP00000286827,ENSP00000317272,ENSP00000345347,ENSP00000355361	APP,BMP6,CD47,EGFR,HMGB1,MET,TGFB1,TIAM1
GO:0043588	skin development	9	0.0013	ENSP00000167588,ENSP00000264670,ENSP00000266674,ENSP00000275493,ENSP00000317272,ENSP00000331678,ENSP00000351209,ENSP00000355124,ENSP00000449404	EGFR,EPHA2,KRT19,KRT20,KRT8,LGR5,MET,NSUN2,PKP3
GO:0045785	positive regulation of cell adhesion	9	0.0013	ENSP00000219022,ENSP00000221930,ENSP00000269571,ENSP00000345347,ENSP00000355361,ENSP00000367154,ENSP00000391490,ENSP00000398632,ENSP00000446121	AGR2,CD44,CD47,ERBB2,HMGB1,LIMS1,OLFM4,RSU1,TGFB1
GO:0051216	cartilage development	6	0.0013	ENSP00000218388,ENSP00000221930,ENSP00000245451,ENSP00000260302,ENSP00000283147,ENSP00000398632	BMP4,BMP6,CD44,MMP13,TGFB1,TIMP1
GO:0002011	morphogenesis of an epithelial sheet	4	0.0014	ENSP00000249749,ENSP00000368169,ENSP00000386170,ENSP00000398632	CD44,DLL4,DVL1,TBX20
GO:0003179	heart valve morphogenesis	4	0.0014	ENSP00000221930,ENSP00000242261,ENSP00000245451,ENSP00000386170	BMP4,TBX20,TGFB1,TWIST1
GO:0010594	regulation of endothelial cell migration	6	0.0014	ENSP00000221930,ENSP00000245451,ENSP00000249749,ENSP00000317272,ENSP00000345347,ENSP00000351209	BMP4,DLL4,EPHA2,HMGB1,MET,TGFB1
GO:0019220	regulation of phosphate metabolic process	20	0.0014	ENSP00000221930,ENSP00000242261,ENSP00000245451,ENSP00000257290,ENSP00000267101,ENSP00000269571,ENSP00000275493,ENSP00000283147,ENSP00000284981,ENSP00000286827,ENSP00000315130,ENSP00000345347,ENSP00000349493,ENSP00000351209,ENSP00000368169,ENSP00000375892,ENSP00000376457,ENSP00000398632,ENSP00000454157,ENSP00000479618	AKT2,APP,BMP4,BMP6,CD44,CLU,DVL1,ECT2,EGFR,EPHA2,ERBB2,ERBB3,GUCA2A,HMGB1,MYC,PDGFRA,TGFB1,TIAM1,TWIST1,ZEB2
GO:0043087	regulation of GTPase activity	10	0.0014	ENSP00000269571,ENSP00000286827,ENSP00000287600,ENSP00000297785,ENSP00000341483,ENSP00000351209,ENSP00000367154,ENSP00000375892,ENSP00000376457,ENSP00000446121	AKT2,ALDH1A1,ECT2,EPHA2,ERBB2,LIMS1,PDE6D,RANBP3,RSU1,TIAM1
GO:0050794	regulation of cellular process	68	0.0014	ENSP00000167588,ENSP00000211998,ENSP00000218388,ENSP00000219022,ENSP00000221930,ENSP00000221992,ENSP00000229922,ENSP00000242261,ENSP00000244930,ENSP00000245451,ENSP00000248444,ENSP00000249749,ENSP00000255448,ENSP00000257290,ENSP00000258080,ENSP00000263735,ENSP00000264094,ENSP00000264670,ENSP00000266674,ENSP00000267101,ENSP00000269571,ENSP00000275493,ENSP00000283147,ENSP00000284981,ENSP00000286827…	ADORA3,AGR2,AKT2,ANTXR1,APP,BIRC5,BMI1,BMP4,BMP6,CAP2,CD44,CD47,CD9,CEACAM5,CHRNB1,CLU,DCLK1,DLL4,DVL1,ECT2,EGFR,EPCAM,EPHA2,ERBB2,ERBB3,FABP1,FAM132A,FAM3D,GPA33,GUCA2A,HMGB1,HTRA2,ITGB5,KRT19,KRT20,KRT8,LGR5,LIMS1,LOXL3,MET,MUC1,MUC13,MYC,NSUN2,OLFM4,PDGFRA,PKP3,PLAU,PROM1,PTTG1,RANBP3,RSU1,SCGB2A1,SERPINB5,SLC26A3,TBX20,TGFB1,TIAM1,TIMP1,TLN1,TSPAN8,TWIST1,UBE2C,UGT1A9,VCL,VIL1,VIM,ZEB2
GO:0001775	cell activation	15	0.0015	ENSP00000211998,ENSP00000218388,ENSP00000219022,ENSP00000221930,ENSP00000249749,ENSP00000257290,ENSP00000275493,ENSP00000284981,ENSP00000315130,ENSP00000345347,ENSP00000355361,ENSP00000361850,ENSP00000371958,ENSP00000398632,ENSP00000411613	AOC1,APP,CD44,CD47,CD9,CLU,DLL4,EGFR,HMGB1,OLFM4,PDGFRA,PLAU,TGFB1,TIMP1,VCL
GO:0010564	regulation of cell cycle process	12	0.0015	ENSP00000221930,ENSP00000245451,ENSP00000275493,ENSP00000284981,ENSP00000301633,ENSP00000341483,ENSP00000348838,ENSP00000365851,ENSP00000375892,ENSP00000376457,ENSP00000377536,ENSP00000484824	AKT2,APP,BIRC5,BMI1,BMP4,ECT2,EGFR,MUC1,PTTG1,RANBP3,TGFB1,UBE2C
GO:0022612	gland morphogenesis	5	0.0015	ENSP00000221930,ENSP00000245451,ENSP00000275493,ENSP00000351209,ENSP00000372221	BMP4,EGFR,EPHA2,SERPINB5,TGFB1
GO:0030195	negative regulation of blood coagulation	4	0.0015	ENSP00000257290,ENSP00000361850,ENSP00000371958,ENSP00000377003	CD9,PDGFRA,PLAU,TSPAN8
GO:0032930	positive regulation of superoxide anion generation	3	0.0015	ENSP00000221930,ENSP00000275493,ENSP00000284981	APP,EGFR,TGFB1
GO:0042552	myelination	5	0.0015	ENSP00000221930,ENSP00000269571,ENSP00000315130,ENSP00000371958,ENSP00000375892	AKT2,CD9,CLU,ERBB2,TGFB1
GO:0048546	digestive tract morphogenesis	4	0.0015	ENSP00000245451,ENSP00000257290,ENSP00000275493,ENSP00000391490	AGR2,BMP4,EGFR,PDGFRA
GO:0048771	tissue remodeling	5	0.0015	ENSP00000218388,ENSP00000221930,ENSP00000249749,ENSP00000345347,ENSP00000351209	DLL4,EPHA2,HMGB1,TGFB1,TIMP1
GO:0051093	negative regulation of developmental process	14	0.0015	ENSP00000218388,ENSP00000221930,ENSP00000221992,ENSP00000242261,ENSP00000245451,ENSP00000249749,ENSP00000264094,ENSP00000269571,ENSP00000275493,ENSP00000284981,ENSP00000314151,ENSP00000345347,ENSP00000446007,ENSP00000479618	APP,BMP4,CEACAM5,DLL4,EGFR,ERBB2,HMGB1,KLK3,LOXL3,MYC,TGFB1,TIMP1,TWIST1,VIM
GO:0003008	system process	21	0.0016	ENSP00000211998,ENSP00000221930,ENSP00000245451,ENSP00000248444,ENSP00000249749,ENSP00000263321,ENSP00000275493,ENSP00000284981,ENSP00000286827,ENSP00000287600,ENSP00000293599,ENSP00000295834,ENSP00000296181,ENSP00000301633,ENSP00000304290,ENSP00000316029,ENSP00000345873,ENSP00000368169,ENSP00000386170,ENSP00000446007,ENSP00000485028	APP,AQP5,BIRC5,BMP4,CHRNB1,DLL4,DVL1,EGFR,FABP1,ITGB5,MUC13,PDE6D,SLC26A3,TBX20,TGFB1,TIAM1,TLN1,TYR,VCL,VIL1,VIM
GO:1902106	negative regulation of leukocyte differentiation	5	0.0016	ENSP00000245451,ENSP00000264094,ENSP00000269571,ENSP00000345347,ENSP00000479618	BMP4,ERBB2,HMGB1,LOXL3,MYC
GO:0003180	aortic valve morphogenesis	3	0.0017	ENSP00000242261,ENSP00000245451,ENSP00000386170	BMP4,TBX20,TWIST1
GO:0030029	actin filament-based process	10	0.0017	ENSP00000229922,ENSP00000248444,ENSP00000257290,ENSP00000296181,ENSP00000301945,ENSP00000316029,ENSP00000348163,ENSP00000355124,ENSP00000446007,ENSP00000449404	ANTXR1,CAP2,ITGB5,KRT19,KRT8,PDGFRA,PLS3,TLN1,VIL1,VIM
GO:1905891	regulation of cellular response to thapsigargin	2	0.0017	ENSP00000284981,ENSP00000315130	APP,CLU
GO:1905894	regulation of cellular response to tunicamycin	2	0.0017	ENSP00000284981,ENSP00000315130	APP,CLU
GO:0007088	regulation of mitotic nuclear division	6	0.0018	ENSP00000221930,ENSP00000245451,ENSP00000301633,ENSP00000341483,ENSP00000348838,ENSP00000377536	BIRC5,BMP4,PTTG1,RANBP3,TGFB1,UBE2C
GO:0031325	positive regulation of cellular metabolic process	29	0.0018	ENSP00000221930,ENSP00000242261,ENSP00000245451,ENSP00000257290,ENSP00000258080,ENSP00000263735,ENSP00000267101,ENSP00000269571,ENSP00000275493,ENSP00000283147,ENSP00000284981,ENSP00000286827,ENSP00000295834,ENSP00000301945,ENSP00000315130,ENSP00000317272,ENSP00000345347,ENSP00000348838,ENSP00000349493,ENSP00000365851,ENSP00000368169,ENSP00000375892,ENSP00000376457,ENSP00000386170,ENSP00000398632…	AKT2,ANTXR1,APP,BMI1,BMP4,BMP6,CD44,CLU,DVL1,ECT2,EGFR,EPCAM,ERBB2,ERBB3,FABP1,GUCA2A,HMGB1,HTRA2,MET,MUC1,MYC,PDGFRA,TBX20,TGFB1,TIAM1,TWIST1,UBE2C,VIM,ZEB2
GO:0007169	transmembrane receptor protein tyrosine kinase signaling pathway	10	0.0019	ENSP00000221930,ENSP00000248444,ENSP00000257290,ENSP00000267101,ENSP00000269571,ENSP00000275493,ENSP00000286827,ENSP00000317272,ENSP00000351209,ENSP00000375892	AKT2,EGFR,EPHA2,ERBB2,ERBB3,MET,PDGFRA,TGFB1,TIAM1,VIL1
GO:0009605	response to external stimulus	21	0.0019	ENSP00000167588,ENSP00000221930,ENSP00000245451,ENSP00000248444,ENSP00000255448,ENSP00000257290,ENSP00000263321,ENSP00000269571,ENSP00000275493,ENSP00000283147,ENSP00000284981,ENSP00000314151,ENSP00000315130,ENSP00000317272,ENSP00000345347,ENSP00000351209,ENSP00000355361,ENSP00000361850,ENSP00000368169,ENSP00000411613,ENSP00000449404	AOC1,APP,BMP4,BMP6,CD47,CLU,DCLK1,DVL1,EGFR,EPHA2,ERBB2,HMGB1,KLK3,KRT20,KRT8,MET,PDGFRA,PLAU,TGFB1,TYR,VIL1
GO:0030182	neuron differentiation	14	0.0019	ENSP00000211998,ENSP00000245451,ENSP00000249749,ENSP00000255448,ENSP00000258080,ENSP00000269571,ENSP00000275493,ENSP00000284981,ENSP00000286827,ENSP00000345347,ENSP00000368169,ENSP00000386170,ENSP00000426809,ENSP00000454157	APP,BMP4,DCLK1,DLL4,DVL1,EGFR,ERBB2,HMGB1,HTRA2,PROM1,TBX20,TIAM1,VCL,ZEB2
GO:0030324	lung development	6	0.0019	ENSP00000245451,ENSP00000257290,ENSP00000264094,ENSP00000275493,ENSP00000345347,ENSP00000391490	AGR2,BMP4,EGFR,HMGB1,LOXL3,PDGFRA
GO:0043547	positive regulation of GTPase activity	9	0.0019	ENSP00000269571,ENSP00000286827,ENSP00000297785,ENSP00000341483,ENSP00000351209,ENSP00000367154,ENSP00000375892,ENSP00000376457,ENSP00000446121	AKT2,ALDH1A1,ECT2,EPHA2,ERBB2,LIMS1,RANBP3,RSU1,TIAM1
GO:1903078	positive regulation of protein localization to plasma membrane	4	0.0019	ENSP00000248444,ENSP00000275493,ENSP00000351209,ENSP00000391490	AGR2,EGFR,EPHA2,VIL1
GO:0045840	positive regulation of mitotic nuclear division	4	0.002	ENSP00000221930,ENSP00000301633,ENSP00000341483,ENSP00000348838	BIRC5,RANBP3,TGFB1,UBE2C
GO:0046854	phosphatidylinositol phosphorylation	5	0.002	ENSP00000257290,ENSP00000267101,ENSP00000269571,ENSP00000275493,ENSP00000317272	EGFR,ERBB2,ERBB3,MET,PDGFRA
GO:0007010	cytoskeleton organization	14	0.0021	ENSP00000167588,ENSP00000229922,ENSP00000248444,ENSP00000257290,ENSP00000296181,ENSP00000301633,ENSP00000301945,ENSP00000316029,ENSP00000341483,ENSP00000348163,ENSP00000355124,ENSP00000368169,ENSP00000446007,ENSP00000449404	ANTXR1,BIRC5,CAP2,DVL1,ITGB5,KRT19,KRT20,KRT8,PDGFRA,PLS3,RANBP3,TLN1,VIL1,VIM
GO:0007586	digestion	5	0.0021	ENSP00000248444,ENSP00000293599,ENSP00000295834,ENSP00000349493,ENSP00000485028	AQP5,FABP1,GUCA2A,MUC13,VIL1
GO:0043410	positive regulation of MAPK cascade	10	0.0021	ENSP00000221930,ENSP00000245451,ENSP00000257290,ENSP00000269571,ENSP00000275493,ENSP00000284981,ENSP00000286827,ENSP00000345347,ENSP00000398632,ENSP00000454157	APP,BMP4,CD44,EGFR,ERBB2,HMGB1,PDGFRA,TGFB1,TIAM1,ZEB2
GO:0045216	cell-cell junction organization	6	0.0021	ENSP00000211998,ENSP00000221930,ENSP00000316029,ENSP00000331678,ENSP00000371958,ENSP00000376457	CD9,ECT2,PKP3,TGFB1,TLN1,VCL
GO:0050789	regulation of biological process	70	0.0021	ENSP00000167588,ENSP00000211998,ENSP00000218388,ENSP00000219022,ENSP00000221930,ENSP00000221992,ENSP00000229922,ENSP00000242261,ENSP00000244930,ENSP00000245451,ENSP00000248444,ENSP00000249749,ENSP00000255448,ENSP00000257290,ENSP00000258080,ENSP00000263735,ENSP00000264094,ENSP00000264670,ENSP00000266674,ENSP00000267101,ENSP00000269571,ENSP00000275493,ENSP00000283147,ENSP00000284981,ENSP00000286827…	ADORA3,AGR2,AKT2,ANTXR1,APP,BIRC5,BMI1,BMP4,BMP6,CAP2,CD44,CD47,CD9,CEACAM5,CHRNB1,CLU,DCLK1,DLL4,DVL1,ECT2,EGFR,EPCAM,EPHA2,ERBB2,ERBB3,FABP1,FAM132A,FAM3D,GPA33,GUCA2A,HMGB1,HTRA2,ITGB5,KLK3,KRT19,KRT20,KRT8,LGR5,LIMS1,LOXL3,MET,MUC1,MUC13,MYC,NSUN2,OLFM4,PDE6D,PDGFRA,PKP3,PLAU,PROM1,PTTG1,RANBP3,RSU1,SCGB2A1,SERPINB5,SLC26A3,TBX20,TGFB1,TIAM1,TIMP1,TLN1,TSPAN8,TWIST1,UBE2C,UGT1A9,VCL,VIL1,VIM,…
GO:0050868	negative regulation of T cell activation	5	0.0021	ENSP00000221930,ENSP00000245451,ENSP00000264094,ENSP00000269571,ENSP00000345347	BMP4,ERBB2,HMGB1,LOXL3,TGFB1
GO:0051248	negative regulation of protein metabolic process	15	0.0021	ENSP00000218388,ENSP00000221930,ENSP00000242261,ENSP00000245451,ENSP00000248444,ENSP00000275493,ENSP00000284981,ENSP00000295834,ENSP00000301633,ENSP00000315130,ENSP00000368169,ENSP00000372221,ENSP00000377536,ENSP00000398632,ENSP00000479618	APP,BIRC5,BMP4,CD44,CLU,DVL1,EGFR,FABP1,MYC,PTTG1,SERPINB5,TGFB1,TIMP1,TWIST1,VIL1
GO:0060348	bone development	6	0.0021	ENSP00000221930,ENSP00000242261,ENSP00000245451,ENSP00000260302,ENSP00000283147,ENSP00000348163	BMP4,BMP6,MMP13,PLS3,TGFB1,TWIST1
GO:0009894	regulation of catabolic process	13	0.0022	ENSP00000218388,ENSP00000242261,ENSP00000258080,ENSP00000275493,ENSP00000284981,ENSP00000295834,ENSP00000315130,ENSP00000317272,ENSP00000331678,ENSP00000345347,ENSP00000368169,ENSP00000375892,ENSP00000446007	AKT2,APP,CLU,DVL1,EGFR,FABP1,HMGB1,HTRA2,MET,PKP3,TIMP1,TWIST1,VIM
GO:0030036	actin cytoskeleton organization	9	0.0022	ENSP00000229922,ENSP00000248444,ENSP00000257290,ENSP00000296181,ENSP00000301945,ENSP00000316029,ENSP00000348163,ENSP00000355124,ENSP00000449404	ANTXR1,CAP2,ITGB5,KRT19,KRT8,PDGFRA,PLS3,TLN1,VIL1
GO:0032940	secretion by cell	14	0.0022	ENSP00000211998,ENSP00000218388,ENSP00000219022,ENSP00000221930,ENSP00000284981,ENSP00000315130,ENSP00000316029,ENSP00000345347,ENSP00000355361,ENSP00000361850,ENSP00000368169,ENSP00000371958,ENSP00000398632,ENSP00000411613	AOC1,APP,CD44,CD47,CD9,CLU,DVL1,HMGB1,OLFM4,PLAU,TGFB1,TIMP1,TLN1,VCL
GO:0048568	embryonic organ development	9	0.0022	ENSP00000221930,ENSP00000242261,ENSP00000245451,ENSP00000257290,ENSP00000275493,ENSP00000355124,ENSP00000368169,ENSP00000386170,ENSP00000449404	BMP4,DVL1,EGFR,KRT19,KRT8,PDGFRA,TBX20,TGFB1,TWIST1
GO:0051173	positive regulation of nitrogen compound metabolic process	28	0.0022	ENSP00000221930,ENSP00000242261,ENSP00000245451,ENSP00000257290,ENSP00000258080,ENSP00000263735,ENSP00000267101,ENSP00000269571,ENSP00000275493,ENSP00000283147,ENSP00000284981,ENSP00000286827,ENSP00000301945,ENSP00000315130,ENSP00000317272,ENSP00000345347,ENSP00000348838,ENSP00000349493,ENSP00000365851,ENSP00000368169,ENSP00000375892,ENSP00000376457,ENSP00000386170,ENSP00000398632,ENSP00000446007…	AKT2,ANTXR1,APP,BMI1,BMP4,BMP6,CD44,CLU,DVL1,ECT2,EGFR,EPCAM,ERBB2,ERBB3,GUCA2A,HMGB1,HTRA2,MET,MUC1,MYC,PDGFRA,TBX20,TGFB1,TIAM1,TWIST1,UBE2C,VIM,ZEB2
GO:0043549	regulation of kinase activity	13	0.0023	ENSP00000221930,ENSP00000245451,ENSP00000257290,ENSP00000267101,ENSP00000269571,ENSP00000275493,ENSP00000284981,ENSP00000286827,ENSP00000315130,ENSP00000345347,ENSP00000368169,ENSP00000376457,ENSP00000454157	APP,BMP4,CLU,DVL1,ECT2,EGFR,ERBB2,ERBB3,HMGB1,PDGFRA,TGFB1,TIAM1,ZEB2
GO:0045786	negative regulation of cell cycle	10	0.0023	ENSP00000221930,ENSP00000245451,ENSP00000258080,ENSP00000264670,ENSP00000275493,ENSP00000301633,ENSP00000365851,ENSP00000377536,ENSP00000479618,ENSP00000484824	BIRC5,BMI1,BMP4,EGFR,HTRA2,MUC1,MYC,NSUN2,PTTG1,TGFB1
GO:0050708	regulation of protein secretion	9	0.0023	ENSP00000167588,ENSP00000221930,ENSP00000242261,ENSP00000275493,ENSP00000283147,ENSP00000286827,ENSP00000329137,ENSP00000345347,ENSP00000351632	BMP6,EGFR,FAM132A,FAM3D,HMGB1,KRT20,TGFB1,TIAM1,TWIST1
GO:0048593	camera-type eye morphogenesis	5	0.0024	ENSP00000242261,ENSP00000245451,ENSP00000293599,ENSP00000351209,ENSP00000426809	AQP5,BMP4,EPHA2,PROM1,TWIST1
GO:0060395	SMAD protein signal transduction	4	0.0024	ENSP00000221930,ENSP00000245451,ENSP00000283147,ENSP00000446007	BMP4,BMP6,TGFB1,VIM
GO:0001822	kidney development	7	0.0025	ENSP00000221930,ENSP00000245451,ENSP00000257290,ENSP00000263735,ENSP00000283147,ENSP00000426809,ENSP00000479618	BMP4,BMP6,EPCAM,MYC,PDGFRA,PROM1,TGFB1
GO:0030858	positive regulation of epithelial cell differentiation	4	0.0025	ENSP00000245451,ENSP00000283147,ENSP00000426809,ENSP00000454157	BMP4,BMP6,PROM1,ZEB2
GO:0031329	regulation of cellular catabolic process	12	0.0025	ENSP00000218388,ENSP00000242261,ENSP00000258080,ENSP00000284981,ENSP00000295834,ENSP00000315130,ENSP00000317272,ENSP00000331678,ENSP00000345347,ENSP00000368169,ENSP00000375892,ENSP00000446007	AKT2,APP,CLU,DVL1,FABP1,HMGB1,HTRA2,MET,PKP3,TIMP1,TWIST1,VIM
GO:0061311	cell surface receptor signaling pathway involved in heart development	3	0.0025	ENSP00000221930,ENSP00000245451,ENSP00000249749	BMP4,DLL4,TGFB1
GO:1900180	regulation of protein localization to nucleus	5	0.0026	ENSP00000221930,ENSP00000245451,ENSP00000255448,ENSP00000284981,ENSP00000376457	APP,BMP4,DCLK1,ECT2,TGFB1
GO:0002376	immune system process	24	0.0027	ENSP00000211998,ENSP00000219022,ENSP00000221930,ENSP00000221992,ENSP00000245451,ENSP00000249749,ENSP00000257290,ENSP00000263321,ENSP00000263735,ENSP00000283147,ENSP00000284981,ENSP00000296181,ENSP00000314151,ENSP00000315130,ENSP00000345347,ENSP00000351209,ENSP00000355361,ENSP00000361850,ENSP00000365851,ENSP00000398632,ENSP00000411613,ENSP00000446007,ENSP00000484824,ENSP00000485028	AOC1,APP,BMI1,BMP4,BMP6,CD44,CD47,CEACAM5,CLU,DLL4,EPCAM,EPHA2,HMGB1,ITGB5,KLK3,MUC1,MUC13,OLFM4,PDGFRA,PLAU,TGFB1,TYR,VCL,VIM
GO:0051179	localization	41	0.0027	ENSP00000211998,ENSP00000218388,ENSP00000219022,ENSP00000221930,ENSP00000221992,ENSP00000242261,ENSP00000245451,ENSP00000248444,ENSP00000255448,ENSP00000257290,ENSP00000263735,ENSP00000264094,ENSP00000275493,ENSP00000284981,ENSP00000286827,ENSP00000293599,ENSP00000295834,ENSP00000301633,ENSP00000304290,ENSP00000315130,ENSP00000316029,ENSP00000331678,ENSP00000332576,ENSP00000341483,ENSP00000345347…	AGR2,AKT2,AOC1,APP,AQP5,BIRC5,BMP4,CD44,CD47,CD9,CEACAM5,CHRNB1,CLU,DCLK1,DVL1,ECT2,EGFR,EPCAM,EPHA2,FABP1,HMGB1,LIMS1,LOXL3,MYC,OLFM4,OSBP2,PDGFRA,PKP3,PLAU,PSG2,RANBP3,SLC26A3,TBX20,TGFB1,TIAM1,TIMP1,TLN1,TWIST1,VCL,VIL1,ZEB2
GO:1990138	neuron projection extension	4	0.0027	ENSP00000211998,ENSP00000255448,ENSP00000286827,ENSP00000368169	DCLK1,DVL1,TIAM1,VCL
GO:0044092	negative regulation of molecular function	15	0.0029	ENSP00000218388,ENSP00000242261,ENSP00000245451,ENSP00000248444,ENSP00000284981,ENSP00000287600,ENSP00000295834,ENSP00000301633,ENSP00000317272,ENSP00000346768,ENSP00000358730,ENSP00000368169,ENSP00000372221,ENSP00000377536,ENSP00000398632	ADORA3,APP,BIRC5,BMP4,CD44,DVL1,FABP1,MET,PDE6D,PTTG1,SERPINB5,TIMP1,TWIST1,UGT1A9,VIL1
GO:0051346	negative regulation of hydrolase activity	9	0.0029	ENSP00000218388,ENSP00000248444,ENSP00000284981,ENSP00000287600,ENSP00000295834,ENSP00000301633,ENSP00000372221,ENSP00000377536,ENSP00000398632	APP,BIRC5,CD44,FABP1,PDE6D,PTTG1,SERPINB5,TIMP1,VIL1
GO:0007219	Notch signaling pathway	5	0.003	ENSP00000221930,ENSP00000249749,ENSP00000284981,ENSP00000355124,ENSP00000479618	APP,DLL4,KRT19,MYC,TGFB1
GO:0051726	regulation of cell cycle	15	0.0031	ENSP00000221930,ENSP00000245451,ENSP00000258080,ENSP00000264670,ENSP00000275493,ENSP00000284981,ENSP00000301633,ENSP00000341483,ENSP00000348838,ENSP00000365851,ENSP00000375892,ENSP00000376457,ENSP00000377536,ENSP00000479618,ENSP00000484824	AKT2,APP,BIRC5,BMI1,BMP4,ECT2,EGFR,HTRA2,MUC1,MYC,NSUN2,PTTG1,RANBP3,TGFB1,UBE2C
GO:0010605	negative regulation of macromolecule metabolic process	25	0.0032	ENSP00000218388,ENSP00000221930,ENSP00000242261,ENSP00000245451,ENSP00000248444,ENSP00000249749,ENSP00000264094,ENSP00000275493,ENSP00000283147,ENSP00000284981,ENSP00000295834,ENSP00000301633,ENSP00000315130,ENSP00000331678,ENSP00000345347,ENSP00000365851,ENSP00000368169,ENSP00000372221,ENSP00000377536,ENSP00000386170,ENSP00000398632,ENSP00000446121,ENSP00000454157,ENSP00000479618,ENSP00000484824	APP,BIRC5,BMI1,BMP4,BMP6,CD44,CLU,DLL4,DVL1,EGFR,FABP1,HMGB1,LIMS1,LOXL3,MUC1,MYC,PKP3,PTTG1,SERPINB5,TBX20,TGFB1,TIMP1,TWIST1,VIL1,ZEB2
GO:0043406	positive regulation of MAP kinase activity	7	0.0032	ENSP00000221930,ENSP00000245451,ENSP00000269571,ENSP00000275493,ENSP00000284981,ENSP00000286827,ENSP00000454157	APP,BMP4,EGFR,ERBB2,TGFB1,TIAM1,ZEB2
GO:0065007	biological regulation	72	0.0032	ENSP00000167588,ENSP00000211998,ENSP00000218388,ENSP00000219022,ENSP00000221930,ENSP00000221992,ENSP00000229922,ENSP00000242261,ENSP00000244930,ENSP00000245451,ENSP00000248444,ENSP00000249749,ENSP00000255448,ENSP00000257290,ENSP00000258080,ENSP00000263735,ENSP00000264094,ENSP00000264670,ENSP00000266674,ENSP00000267101,ENSP00000269571,ENSP00000275493,ENSP00000283147,ENSP00000284981,ENSP00000286827…	ADORA3,AGR2,AKT2,ALDH1A1,ANTXR1,APP,AQP5,BIRC5,BMI1,BMP4,BMP6,CAP2,CD44,CD47,CD9,CEACAM5,CHRNB1,CLU,DCLK1,DLL4,DVL1,ECT2,EGFR,EPCAM,EPHA2,ERBB2,ERBB3,FABP1,FAM132A,FAM3D,GPA33,GUCA2A,HMGB1,HTRA2,ITGB5,KLK3,KRT19,KRT20,KRT8,LGR5,LIMS1,LOXL3,MET,MUC1,MUC13,MYC,NSUN2,OLFM4,PDE6D,PDGFRA,PKP3,PLAU,PROM1,PTTG1,RANBP3,RSU1,SCGB2A1,SERPINB5,SLC26A3,TBX20,TGFB1,TIAM1,TIMP1,TLN1,TSPAN8,TWIST1,UBE2C,UGT1A9,…
GO:0071677	positive regulation of mononuclear cell migration	3	0.0033	ENSP00000221930,ENSP00000284981,ENSP00000345347	APP,HMGB1,TGFB1
GO:0009790	embryo development	13	0.0034	ENSP00000221930,ENSP00000242261,ENSP00000245451,ENSP00000249749,ENSP00000257290,ENSP00000264094,ENSP00000275493,ENSP00000296181,ENSP00000355124,ENSP00000368169,ENSP00000386170,ENSP00000449404,ENSP00000454157	BMP4,DLL4,DVL1,EGFR,ITGB5,KRT19,KRT8,LOXL3,PDGFRA,TBX20,TGFB1,TWIST1,ZEB2
GO:0050920	regulation of chemotaxis	6	0.0034	ENSP00000221930,ENSP00000257290,ENSP00000284981,ENSP00000286827,ENSP00000317272,ENSP00000345347	APP,HMGB1,MET,PDGFRA,TGFB1,TIAM1
GO:0051098	regulation of binding	8	0.0034	ENSP00000221930,ENSP00000242261,ENSP00000245451,ENSP00000284981,ENSP00000286827,ENSP00000317272,ENSP00000345347,ENSP00000368169	APP,BMP4,DVL1,HMGB1,MET,TGFB1,TIAM1,TWIST1
GO:1901992	positive regulation of mitotic cell cycle phase transition	4	0.0034	ENSP00000221930,ENSP00000284981,ENSP00000301633,ENSP00000348838	APP,BIRC5,TGFB1,UBE2C
GO:1905908	positive regulation of amyloid fibril formation	2	0.0034	ENSP00000284981,ENSP00000315130	APP,CLU
GO:0001958	endochondral ossification	3	0.0035	ENSP00000245451,ENSP00000260302,ENSP00000283147	BMP4,BMP6,MMP13
GO:0010565	regulation of cellular ketone metabolic process	5	0.0035	ENSP00000242261,ENSP00000283147,ENSP00000295834,ENSP00000346768,ENSP00000375892	AKT2,BMP6,FABP1,TWIST1,UGT1A9
GO:0030500	regulation of bone mineralization	4	0.0035	ENSP00000221930,ENSP00000242261,ENSP00000245451,ENSP00000283147	BMP4,BMP6,TGFB1,TWIST1
GO:0032504	multicellular organism reproduction	12	0.0035	ENSP00000221930,ENSP00000245451,ENSP00000257290,ENSP00000264670,ENSP00000266674,ENSP00000275493,ENSP00000284981,ENSP00000332576,ENSP00000345873,ENSP00000371958,ENSP00000377003,ENSP00000377536	APP,BMP4,CD9,EGFR,LGR5,NSUN2,OSBP2,PDGFRA,PTTG1,SLC26A3,TGFB1,TSPAN8
GO:0032967	positive regulation of collagen biosynthetic process	3	0.0035	ENSP00000221930,ENSP00000245451,ENSP00000446007	BMP4,TGFB1,VIM
GO:0048709	oligodendrocyte differentiation	4	0.0035	ENSP00000221930,ENSP00000269571,ENSP00000315130,ENSP00000371958	CD9,CLU,ERBB2,TGFB1
GO:0051240	positive regulation of multicellular organismal process	18	0.0035	ENSP00000221930,ENSP00000242261,ENSP00000245451,ENSP00000248444,ENSP00000267101,ENSP00000275493,ENSP00000283147,ENSP00000284981,ENSP00000286827,ENSP00000315130,ENSP00000317272,ENSP00000345347,ENSP00000368169,ENSP00000376457,ENSP00000386170,ENSP00000426809,ENSP00000454157,ENSP00000479618	APP,BMP4,BMP6,CLU,DVL1,ECT2,EGFR,ERBB3,HMGB1,MET,MYC,PROM1,TBX20,TGFB1,TIAM1,TWIST1,VIL1,ZEB2
GO:0051271	negative regulation of cellular component movement	7	0.0035	ENSP00000211998,ENSP00000218388,ENSP00000221930,ENSP00000249749,ENSP00000345347,ENSP00000358730,ENSP00000371958	ADORA3,CD9,DLL4,HMGB1,TGFB1,TIMP1,VCL
GO:0070306	lens fiber cell differentiation	3	0.0035	ENSP00000221930,ENSP00000351209,ENSP00000446007	EPHA2,TGFB1,VIM
GO:1904888	cranial skeletal system development	4	0.0035	ENSP00000221930,ENSP00000242261,ENSP00000245451,ENSP00000257290	BMP4,PDGFRA,TGFB1,TWIST1
GO:0001501	skeletal system development	9	0.0036	ENSP00000218388,ENSP00000221930,ENSP00000242261,ENSP00000245451,ENSP00000257290,ENSP00000260302,ENSP00000283147,ENSP00000348163,ENSP00000398632	BMP4,BMP6,CD44,MMP13,PDGFRA,PLS3,TGFB1,TIMP1,TWIST1
GO:0061061	muscle structure development	9	0.0036	ENSP00000221930,ENSP00000242261,ENSP00000245451,ENSP00000249749,ENSP00000257290,ENSP00000304290,ENSP00000355124,ENSP00000386170,ENSP00000449404	BMP4,CHRNB1,DLL4,KRT19,KRT8,PDGFRA,TBX20,TGFB1,TWIST1
GO:0090068	positive regulation of cell cycle process	7	0.0036	ENSP00000221930,ENSP00000284981,ENSP00000301633,ENSP00000341483,ENSP00000348838,ENSP00000376457,ENSP00000484824	APP,BIRC5,ECT2,MUC1,RANBP3,TGFB1,UBE2C
GO:0002088	lens development in camera-type eye	4	0.0037	ENSP00000221930,ENSP00000245451,ENSP00000351209,ENSP00000446007	BMP4,EPHA2,TGFB1,VIM
GO:0018108	peptidyl-tyrosine phosphorylation	6	0.0037	ENSP00000257290,ENSP00000267101,ENSP00000269571,ENSP00000275493,ENSP00000317272,ENSP00000351209	EGFR,EPHA2,ERBB2,ERBB3,MET,PDGFRA
GO:0022600	digestive system process	4	0.0037	ENSP00000248444,ENSP00000293599,ENSP00000295834,ENSP00000485028	AQP5,FABP1,MUC13,VIL1
GO:0045597	positive regulation of cell differentiation	13	0.0037	ENSP00000219022,ENSP00000221930,ENSP00000242261,ENSP00000245451,ENSP00000283147,ENSP00000284981,ENSP00000286827,ENSP00000345347,ENSP00000368169,ENSP00000376457,ENSP00000426809,ENSP00000446121,ENSP00000454157	APP,BMP4,BMP6,DVL1,ECT2,HMGB1,LIMS1,OLFM4,PROM1,TGFB1,TIAM1,TWIST1,ZEB2
GO:0045859	regulation of protein kinase activity	12	0.0037	ENSP00000221930,ENSP00000245451,ENSP00000267101,ENSP00000269571,ENSP00000275493,ENSP00000284981,ENSP00000286827,ENSP00000315130,ENSP00000345347,ENSP00000368169,ENSP00000376457,ENSP00000454157	APP,BMP4,CLU,DVL1,ECT2,EGFR,ERBB2,ERBB3,HMGB1,TGFB1,TIAM1,ZEB2
GO:0061900	glial cell activation	3	0.0037	ENSP00000275493,ENSP00000284981,ENSP00000315130	APP,CLU,EGFR
GO:0048565	digestive tract development	5	0.0038	ENSP00000221930,ENSP00000245451,ENSP00000257290,ENSP00000275493,ENSP00000391490	AGR2,BMP4,EGFR,PDGFRA,TGFB1
GO:1901224	positive regulation of NIK/NF-kappaB signaling	4	0.0038	ENSP00000275493,ENSP00000284981,ENSP00000345347,ENSP00000446121	APP,EGFR,HMGB1,LIMS1
GO:1904589	regulation of protein import	4	0.0038	ENSP00000221930,ENSP00000245451,ENSP00000284981,ENSP00000376457	APP,BMP4,ECT2,TGFB1
GO:0016202	regulation of striated muscle tissue development	5	0.0039	ENSP00000221930,ENSP00000242261,ENSP00000245451,ENSP00000267101,ENSP00000386170	BMP4,ERBB3,TBX20,TGFB1,TWIST1
GO:0045892	negative regulation of transcription, DNA-templated	15	0.0039	ENSP00000221930,ENSP00000242261,ENSP00000245451,ENSP00000249749,ENSP00000264094,ENSP00000283147,ENSP00000284981,ENSP00000301633,ENSP00000345347,ENSP00000365851,ENSP00000386170,ENSP00000446121,ENSP00000454157,ENSP00000479618,ENSP00000484824	APP,BIRC5,BMI1,BMP4,BMP6,DLL4,HMGB1,LIMS1,LOXL3,MUC1,MYC,TBX20,TGFB1,TWIST1,ZEB2
GO:0072073	kidney epithelium development	5	0.0039	ENSP00000221930,ENSP00000245451,ENSP00000263735,ENSP00000426809,ENSP00000479618	BMP4,EPCAM,MYC,PROM1,TGFB1
GO:1903037	regulation of leukocyte cell-cell adhesion	7	0.0039	ENSP00000221930,ENSP00000245451,ENSP00000264094,ENSP00000269571,ENSP00000345347,ENSP00000355361,ENSP00000398632	BMP4,CD44,CD47,ERBB2,HMGB1,LOXL3,TGFB1
GO:0002274	myeloid leukocyte activation	10	0.004	ENSP00000211998,ENSP00000219022,ENSP00000221930,ENSP00000284981,ENSP00000315130,ENSP00000345347,ENSP00000355361,ENSP00000361850,ENSP00000398632,ENSP00000411613	AOC1,APP,CD44,CD47,CLU,HMGB1,OLFM4,PLAU,TGFB1,VCL
GO:0045596	negative regulation of cell differentiation	11	0.004	ENSP00000221930,ENSP00000221992,ENSP00000242261,ENSP00000245451,ENSP00000264094,ENSP00000269571,ENSP00000275493,ENSP00000284981,ENSP00000345347,ENSP00000446007,ENSP00000479618	APP,BMP4,CEACAM5,EGFR,ERBB2,HMGB1,LOXL3,MYC,TGFB1,TWIST1,VIM
GO:0051253	negative regulation of RNA metabolic process	16	0.004	ENSP00000221930,ENSP00000242261,ENSP00000245451,ENSP00000249749,ENSP00000264094,ENSP00000283147,ENSP00000284981,ENSP00000301633,ENSP00000331678,ENSP00000345347,ENSP00000365851,ENSP00000386170,ENSP00000446121,ENSP00000454157,ENSP00000479618,ENSP00000484824	APP,BIRC5,BMI1,BMP4,BMP6,DLL4,HMGB1,LIMS1,LOXL3,MUC1,MYC,PKP3,TBX20,TGFB1,TWIST1,ZEB2
GO:0002248	connective tissue replacement involved in inflammatory response wound healing	2	0.0041	ENSP00000218388,ENSP00000221930	TGFB1,TIMP1
GO:0006468	protein phosphorylation	13	0.0041	ENSP00000221930,ENSP00000245451,ENSP00000255448,ENSP00000257290,ENSP00000267101,ENSP00000269571,ENSP00000275493,ENSP00000284981,ENSP00000301633,ENSP00000317272,ENSP00000351209,ENSP00000375892,ENSP00000479618	AKT2,APP,BIRC5,BMP4,DCLK1,EGFR,EPHA2,ERBB2,ERBB3,MET,MYC,PDGFRA,TGFB1
GO:0010469	regulation of signaling receptor activity	10	0.0041	ENSP00000218388,ENSP00000221930,ENSP00000245451,ENSP00000283147,ENSP00000284981,ENSP00000329137,ENSP00000345347,ENSP00000349493,ENSP00000351632,ENSP00000361850	APP,BMP4,BMP6,FAM132A,FAM3D,GUCA2A,HMGB1,PLAU,TGFB1,TIMP1
GO:0014002	astrocyte development	3	0.0041	ENSP00000275493,ENSP00000284981,ENSP00000446007	APP,EGFR,VIM
GO:0019216	regulation of lipid metabolic process	8	0.0041	ENSP00000221930,ENSP00000242261,ENSP00000257290,ENSP00000283147,ENSP00000284981,ENSP00000295834,ENSP00000346768,ENSP00000375892	AKT2,APP,BMP6,FABP1,PDGFRA,TGFB1,TWIST1,UGT1A9
GO:0033088	negative regulation of immature T cell proliferation in thymus	2	0.0041	ENSP00000245451,ENSP00000269571	BMP4,ERBB2
GO:0045580	regulation of T cell differentiation	5	0.0041	ENSP00000221930,ENSP00000245451,ENSP00000264094,ENSP00000269571,ENSP00000345347	BMP4,ERBB2,HMGB1,LOXL3,TGFB1
GO:0048762	mesenchymal cell differentiation	5	0.0041	ENSP00000221930,ENSP00000242261,ENSP00000245451,ENSP00000264094,ENSP00000454157	BMP4,LOXL3,TGFB1,TWIST1,ZEB2
GO:0072104	glomerular capillary formation	2	0.0041	ENSP00000245451,ENSP00000257290	BMP4,PDGFRA
GO:0009628	response to abiotic stimulus	14	0.0042	ENSP00000221930,ENSP00000242261,ENSP00000258080,ENSP00000263321,ENSP00000275493,ENSP00000283147,ENSP00000284981,ENSP00000295834,ENSP00000361850,ENSP00000371958,ENSP00000375892,ENSP00000376457,ENSP00000449404,ENSP00000479618	AKT2,APP,BMP6,CD9,ECT2,EGFR,FABP1,HTRA2,KRT8,MYC,PLAU,TGFB1,TWIST1,TYR
GO:0045787	positive regulation of cell cycle	8	0.0042	ENSP00000221930,ENSP00000275493,ENSP00000284981,ENSP00000301633,ENSP00000341483,ENSP00000348838,ENSP00000376457,ENSP00000484824	APP,BIRC5,ECT2,EGFR,MUC1,RANBP3,TGFB1,UBE2C
GO:0043086	negative regulation of catalytic activity	12	0.0043	ENSP00000218388,ENSP00000245451,ENSP00000248444,ENSP00000284981,ENSP00000287600,ENSP00000295834,ENSP00000301633,ENSP00000346768,ENSP00000368169,ENSP00000372221,ENSP00000377536,ENSP00000398632	APP,BIRC5,BMP4,CD44,DVL1,FABP1,PDE6D,PTTG1,SERPINB5,TIMP1,UGT1A9,VIL1
GO:0048705	skeletal system morphogenesis	6	0.0043	ENSP00000221930,ENSP00000242261,ENSP00000245451,ENSP00000257290,ENSP00000260302,ENSP00000283147	BMP4,BMP6,MMP13,PDGFRA,TGFB1,TWIST1
GO:1902230	negative regulation of intrinsic apoptotic signaling pathway in response to DNA damage	3	0.0044	ENSP00000315130,ENSP00000398632,ENSP00000484824	CD44,CLU,MUC1
GO:2001021	negative regulation of response to DNA damage stimulus	4	0.0045	ENSP00000242261,ENSP00000315130,ENSP00000398632,ENSP00000484824	CD44,CLU,MUC1,TWIST1
GO:0003012	muscle system process	7	0.0046	ENSP00000211998,ENSP00000286827,ENSP00000296181,ENSP00000304290,ENSP00000316029,ENSP00000386170,ENSP00000446007	CHRNB1,ITGB5,TBX20,TIAM1,TLN1,VCL,VIM
GO:0006954	inflammatory response	9	0.0046	ENSP00000218388,ENSP00000221930,ENSP00000264094,ENSP00000275493,ENSP00000283147,ENSP00000284981,ENSP00000315130,ENSP00000345347,ENSP00000358730	ADORA3,APP,BMP6,CLU,EGFR,HMGB1,LOXL3,TGFB1,TIMP1
GO:0022607	cellular component assembly	23	0.0046	ENSP00000211998,ENSP00000219022,ENSP00000221930,ENSP00000248444,ENSP00000257290,ENSP00000258080,ENSP00000284981,ENSP00000296181,ENSP00000301633,ENSP00000301634,ENSP00000315130,ENSP00000316029,ENSP00000331678,ENSP00000345347,ENSP00000348163,ENSP00000348838,ENSP00000355124,ENSP00000368169,ENSP00000371958,ENSP00000376457,ENSP00000446121,ENSP00000449404,ENSP00000479618	APP,BIRC5,CD9,CLU,DVL1,ECT2,HMGB1,HTRA2,ITGB5,KRT19,KRT8,LIMS1,MYC,OLFM4,PDGFRA,PKP3,PLS3,TGFB1,TK1,TLN1,UBE2C,VCL,VIL1
GO:0032872	regulation of stress-activated MAPK cascade	6	0.0046	ENSP00000275493,ENSP00000284981,ENSP00000286827,ENSP00000345347,ENSP00000454157,ENSP00000479618	APP,EGFR,HMGB1,MYC,TIAM1,ZEB2
GO:2000027	regulation of animal organ morphogenesis	6	0.0046	ENSP00000221930,ENSP00000242261,ENSP00000245451,ENSP00000286827,ENSP00000368169,ENSP00000479618	BMP4,DVL1,MYC,TGFB1,TIAM1,TWIST1
GO:0010634	positive regulation of epithelial cell migration	5	0.0047	ENSP00000221930,ENSP00000245451,ENSP00000248444,ENSP00000317272,ENSP00000345347	BMP4,HMGB1,MET,TGFB1,VIL1
GO:0038128	ERBB2 signaling pathway	3	0.0047	ENSP00000267101,ENSP00000269571,ENSP00000275493	EGFR,ERBB2,ERBB3
GO:0007492	endoderm development	4	0.0048	ENSP00000221930,ENSP00000245451,ENSP00000296181,ENSP00000386170	BMP4,ITGB5,TBX20,TGFB1
GO:0006935	chemotaxis	9	0.005	ENSP00000245451,ENSP00000257290,ENSP00000269571,ENSP00000284981,ENSP00000317272,ENSP00000345347,ENSP00000351209,ENSP00000361850,ENSP00000368169	APP,BMP4,DVL1,EPHA2,ERBB2,HMGB1,MET,PDGFRA,PLAU
GO:0007182	common-partner SMAD protein phosphorylation	2	0.005	ENSP00000221930,ENSP00000245451	BMP4,TGFB1
GO:0010720	positive regulation of cell development	9	0.005	ENSP00000219022,ENSP00000245451,ENSP00000283147,ENSP00000284981,ENSP00000286827,ENSP00000368169,ENSP00000376457,ENSP00000446121,ENSP00000454157	APP,BMP4,BMP6,DVL1,ECT2,LIMS1,OLFM4,TIAM1,ZEB2
GO:0032640	tumor necrosis factor production	2	0.005	ENSP00000284981,ENSP00000345347	APP,HMGB1
GO:0043537	negative regulation of blood vessel endothelial cell migration	3	0.005	ENSP00000221930,ENSP00000249749,ENSP00000345347	DLL4,HMGB1,TGFB1
GO:0050921	positive regulation of chemotaxis	5	0.005	ENSP00000221930,ENSP00000284981,ENSP00000286827,ENSP00000317272,ENSP00000345347	APP,HMGB1,MET,TGFB1,TIAM1
GO:1901797	negative regulation of signal transduction by p53 class mediator	3	0.005	ENSP00000242261,ENSP00000398632,ENSP00000484824	CD44,MUC1,TWIST1
GO:0000904	cell morphogenesis involved in differentiation	9	0.0053	ENSP00000211998,ENSP00000255448,ENSP00000269571,ENSP00000284981,ENSP00000301945,ENSP00000317272,ENSP00000351209,ENSP00000368169,ENSP00000454157	ANTXR1,APP,DCLK1,DVL1,EPHA2,ERBB2,MET,VCL,ZEB2
GO:0043552	positive regulation of phosphatidylinositol 3-kinase activity	3	0.0053	ENSP00000221930,ENSP00000257290,ENSP00000284981	APP,PDGFRA,TGFB1
GO:0048732	gland development	8	0.0053	ENSP00000221930,ENSP00000245451,ENSP00000257290,ENSP00000263321,ENSP00000275493,ENSP00000351209,ENSP00000372221,ENSP00000375892	AKT2,BMP4,EGFR,EPHA2,PDGFRA,SERPINB5,TGFB1,TYR
GO:1901342	regulation of vasculature development	7	0.0056	ENSP00000242261,ENSP00000245451,ENSP00000249749,ENSP00000269571,ENSP00000314151,ENSP00000345347,ENSP00000351209	BMP4,DLL4,EPHA2,ERBB2,HMGB1,KLK3,TWIST1
GO:0045931	positive regulation of mitotic cell cycle	5	0.0057	ENSP00000221930,ENSP00000284981,ENSP00000301633,ENSP00000341483,ENSP00000348838	APP,BIRC5,RANBP3,TGFB1,UBE2C
GO:0060284	regulation of cell development	12	0.0057	ENSP00000219022,ENSP00000221930,ENSP00000245451,ENSP00000249749,ENSP00000283147,ENSP00000284981,ENSP00000286827,ENSP00000368169,ENSP00000376457,ENSP00000446007,ENSP00000446121,ENSP00000454157	APP,BMP4,BMP6,DLL4,DVL1,ECT2,LIMS1,OLFM4,TGFB1,TIAM1,VIM,ZEB2
GO:0008544	epidermis development	8	0.0058	ENSP00000167588,ENSP00000264670,ENSP00000266674,ENSP00000275493,ENSP00000331678,ENSP00000351209,ENSP00000355124,ENSP00000449404	EGFR,EPHA2,KRT19,KRT20,KRT8,LGR5,NSUN2,PKP3
GO:0050865	regulation of cell activation	9	0.0058	ENSP00000221930,ENSP00000245451,ENSP00000257290,ENSP00000264094,ENSP00000269571,ENSP00000284981,ENSP00000345347,ENSP00000355361,ENSP00000371958	APP,BMP4,CD47,CD9,ERBB2,HMGB1,LOXL3,PDGFRA,TGFB1
GO:0034599	cellular response to oxidative stress	6	0.0059	ENSP00000257290,ENSP00000258080,ENSP00000275493,ENSP00000295834,ENSP00000374265,ENSP00000376457	ECT2,EGFR,FABP1,GPX2,HTRA2,PDGFRA
GO:0001649	osteoblast differentiation	4	0.006	ENSP00000242261,ENSP00000245451,ENSP00000283147,ENSP00000351209	BMP4,BMP6,EPHA2,TWIST1
GO:0030501	positive regulation of bone mineralization	3	0.006	ENSP00000221930,ENSP00000245451,ENSP00000283147	BMP4,BMP6,TGFB1
GO:0048675	axon extension	3	0.006	ENSP00000211998,ENSP00000255448,ENSP00000368169	DCLK1,DVL1,VCL
GO:0050673	epithelial cell proliferation	4	0.006	ENSP00000245451,ENSP00000266674,ENSP00000345347,ENSP00000351209	BMP4,EPHA2,HMGB1,LGR5
GO:0110110	positive regulation of animal organ morphogenesis	4	0.006	ENSP00000221930,ENSP00000242261,ENSP00000245451,ENSP00000479618	BMP4,MYC,TGFB1,TWIST1
GO:1902949	positive regulation of tau-protein kinase activity	2	0.006	ENSP00000284981,ENSP00000315130	APP,CLU
GO:0065008	regulation of biological quality	30	0.0061	ENSP00000221930,ENSP00000245451,ENSP00000248444,ENSP00000257290,ENSP00000275493,ENSP00000283147,ENSP00000284981,ENSP00000286827,ENSP00000293599,ENSP00000297785,ENSP00000304290,ENSP00000315130,ENSP00000316029,ENSP00000317272,ENSP00000329137,ENSP00000345347,ENSP00000345873,ENSP00000346768,ENSP00000348838,ENSP00000351632,ENSP00000361850,ENSP00000368169,ENSP00000371958,ENSP00000375892,ENSP00000377003…	AGR2,AKT2,ALDH1A1,APP,AQP5,BMP4,BMP6,CD9,CHRNB1,CLU,DVL1,EGFR,FAM132A,FAM3D,HMGB1,MET,MUC13,MYC,PDGFRA,PLAU,PROM1,SLC26A3,TGFB1,TIAM1,TLN1,TSPAN8,UBE2C,UGT1A9,VIL1,VIM
GO:0033044	regulation of chromosome organization	7	0.0062	ENSP00000221930,ENSP00000242261,ENSP00000301633,ENSP00000348838,ENSP00000377536,ENSP00000479618,ENSP00000484824	BIRC5,MUC1,MYC,PTTG1,TGFB1,TWIST1,UBE2C
GO:0007528	neuromuscular junction development	3	0.0063	ENSP00000269571,ENSP00000284981,ENSP00000368169	APP,DVL1,ERBB2
GO:1902532	negative regulation of intracellular signal transduction	9	0.0063	ENSP00000242261,ENSP00000245451,ENSP00000258080,ENSP00000315130,ENSP00000317272,ENSP00000351209,ENSP00000398632,ENSP00000479618,ENSP00000484824	BMP4,CD44,CLU,EPHA2,HTRA2,MET,MUC1,MYC,TWIST1
GO:0035556	intracellular signal transduction	17	0.0064	ENSP00000221930,ENSP00000255448,ENSP00000257290,ENSP00000258080,ENSP00000267101,ENSP00000269571,ENSP00000275493,ENSP00000284981,ENSP00000286827,ENSP00000315130,ENSP00000317272,ENSP00000351209,ENSP00000368169,ENSP00000375892,ENSP00000376457,ENSP00000479618,ENSP00000484824	AKT2,APP,CLU,DCLK1,DVL1,ECT2,EGFR,EPHA2,ERBB2,ERBB3,HTRA2,MET,MUC1,MYC,PDGFRA,TGFB1,TIAM1
GO:0001657	ureteric bud development	4	0.0066	ENSP00000221930,ENSP00000245451,ENSP00000263735,ENSP00000479618	BMP4,EPCAM,MYC,TGFB1
GO:0019217	regulation of fatty acid metabolic process	4	0.0066	ENSP00000242261,ENSP00000295834,ENSP00000346768,ENSP00000375892	AKT2,FABP1,TWIST1,UGT1A9
GO:0045839	negative regulation of mitotic nuclear division	3	0.0067	ENSP00000245451,ENSP00000301633,ENSP00000377536	BIRC5,BMP4,PTTG1
GO:0022412	cellular process involved in reproduction in multicellular organism	7	0.0068	ENSP00000221930,ENSP00000245451,ENSP00000264670,ENSP00000266674,ENSP00000332576,ENSP00000345873,ENSP00000371958	BMP4,CD9,LGR5,NSUN2,OSBP2,SLC26A3,TGFB1
GO:1901184	regulation of ERBB signaling pathway	4	0.0068	ENSP00000269571,ENSP00000275493,ENSP00000284981,ENSP00000391490	AGR2,APP,EGFR,ERBB2
GO:0002067	glandular epithelial cell differentiation	3	0.007	ENSP00000245451,ENSP00000283147,ENSP00000391490	AGR2,BMP4,BMP6
GO:0043535	regulation of blood vessel endothelial cell migration	4	0.007	ENSP00000221930,ENSP00000249749,ENSP00000345347,ENSP00000351209	DLL4,EPHA2,HMGB1,TGFB1
GO:0048738	cardiac muscle tissue development	5	0.007	ENSP00000221930,ENSP00000245451,ENSP00000249749,ENSP00000257290,ENSP00000386170	BMP4,DLL4,PDGFRA,TBX20,TGFB1
GO:0000165	MAPK cascade	7	0.0071	ENSP00000221930,ENSP00000257290,ENSP00000267101,ENSP00000269571,ENSP00000275493,ENSP00000317272,ENSP00000479618	EGFR,ERBB2,ERBB3,MET,MYC,PDGFRA,TGFB1
GO:0051701	interaction with host	5	0.0073	ENSP00000221930,ENSP00000275493,ENSP00000296181,ENSP00000317272,ENSP00000351209	EGFR,EPHA2,ITGB5,MET,TGFB1
GO:0014003	oligodendrocyte development	3	0.0074	ENSP00000221930,ENSP00000315130,ENSP00000371958	CD9,CLU,TGFB1
GO:0031328	positive regulation of cellular biosynthetic process	19	0.0074	ENSP00000221930,ENSP00000242261,ENSP00000245451,ENSP00000263735,ENSP00000269571,ENSP00000275493,ENSP00000283147,ENSP00000284981,ENSP00000315130,ENSP00000317272,ENSP00000345347,ENSP00000349493,ENSP00000368169,ENSP00000375892,ENSP00000386170,ENSP00000446007,ENSP00000454157,ENSP00000479618,ENSP00000484824	AKT2,APP,BMP4,BMP6,CLU,DVL1,EGFR,EPCAM,ERBB2,GUCA2A,HMGB1,MET,MUC1,MYC,TBX20,TGFB1,TWIST1,VIM,ZEB2
GO:0030336	negative regulation of cell migration	6	0.0075	ENSP00000211998,ENSP00000218388,ENSP00000221930,ENSP00000249749,ENSP00000345347,ENSP00000358730	ADORA3,DLL4,HMGB1,TGFB1,TIMP1,VCL
GO:0006109	regulation of carbohydrate metabolic process	5	0.0076	ENSP00000221930,ENSP00000329137,ENSP00000345347,ENSP00000346768,ENSP00000375892	AKT2,FAM132A,HMGB1,TGFB1,UGT1A9
GO:0032269	negative regulation of cellular protein metabolic process	13	0.0076	ENSP00000218388,ENSP00000221930,ENSP00000242261,ENSP00000245451,ENSP00000248444,ENSP00000284981,ENSP00000295834,ENSP00000301633,ENSP00000368169,ENSP00000372221,ENSP00000377536,ENSP00000398632,ENSP00000479618	APP,BIRC5,BMP4,CD44,DVL1,FABP1,MYC,PTTG1,SERPINB5,TGFB1,TIMP1,TWIST1,VIL1
GO:0043154	negative regulation of cysteine-type endopeptidase activity involved in apoptotic process	4	0.0077	ENSP00000248444,ENSP00000295834,ENSP00000301633,ENSP00000398632	BIRC5,CD44,FABP1,VIL1
GO:0048609	multicellular organismal reproductive process	11	0.0077	ENSP00000221930,ENSP00000245451,ENSP00000257290,ENSP00000264670,ENSP00000266674,ENSP00000275493,ENSP00000284981,ENSP00000332576,ENSP00000345873,ENSP00000377003,ENSP00000377536	APP,BMP4,EGFR,LGR5,NSUN2,OSBP2,PDGFRA,PTTG1,SLC26A3,TGFB1,TSPAN8
GO:0090630	activation of GTPase activity	4	0.0077	ENSP00000286827,ENSP00000351209,ENSP00000375892,ENSP00000376457	AKT2,ECT2,EPHA2,TIAM1
GO:0010927	cellular component assembly involved in morphogenesis	4	0.0078	ENSP00000257290,ENSP00000355124,ENSP00000371958,ENSP00000449404	CD9,KRT19,KRT8,PDGFRA
GO:0044403	symbiont process	10	0.0078	ENSP00000221930,ENSP00000257290,ENSP00000275493,ENSP00000296181,ENSP00000316029,ENSP00000317272,ENSP00000351209,ENSP00000355124,ENSP00000446007,ENSP00000449404	EGFR,EPHA2,ITGB5,KRT19,KRT8,MET,PDGFRA,TGFB1,TLN1,VIM
GO:0050714	positive regulation of protein secretion	6	0.0078	ENSP00000221930,ENSP00000242261,ENSP00000275493,ENSP00000283147,ENSP00000329137,ENSP00000345347	BMP6,EGFR,FAM132A,HMGB1,TGFB1,TWIST1
GO:0051050	positive regulation of transport	12	0.0078	ENSP00000221930,ENSP00000242261,ENSP00000269571,ENSP00000275493,ENSP00000283147,ENSP00000284981,ENSP00000315130,ENSP00000329137,ENSP00000345347,ENSP00000355361,ENSP00000375892,ENSP00000376457	AKT2,APP,BMP6,CD47,CLU,ECT2,EGFR,ERBB2,FAM132A,HMGB1,TGFB1,TWIST1
GO:0051402	neuron apoptotic process	3	0.0078	ENSP00000267101,ENSP00000284981,ENSP00000375892	AKT2,APP,ERBB3
GO:0071364	cellular response to epidermal growth factor stimulus	3	0.0078	ENSP00000248444,ENSP00000269571,ENSP00000275493	EGFR,ERBB2,VIL1
GO:0080090	regulation of primary metabolic process	43	0.0078	ENSP00000218388,ENSP00000221930,ENSP00000242261,ENSP00000245451,ENSP00000248444,ENSP00000249749,ENSP00000257290,ENSP00000258080,ENSP00000263735,ENSP00000264094,ENSP00000267101,ENSP00000269571,ENSP00000275493,ENSP00000283147,ENSP00000284981,ENSP00000286827,ENSP00000295834,ENSP00000301633,ENSP00000301945,ENSP00000315130,ENSP00000317272,ENSP00000329137,ENSP00000331678,ENSP00000345347,ENSP00000345873…	ADORA3,AKT2,ANTXR1,APP,BIRC5,BMI1,BMP4,BMP6,CD44,CLU,DLL4,DVL1,ECT2,EGFR,EPCAM,EPHA2,ERBB2,ERBB3,FABP1,FAM132A,GUCA2A,HMGB1,HTRA2,LIMS1,LOXL3,MET,MUC1,MYC,PDGFRA,PKP3,PTTG1,SERPINB5,SLC26A3,TBX20,TGFB1,TIAM1,TIMP1,TWIST1,UBE2C,UGT1A9,VIL1,VIM,ZEB2
GO:1901700	response to oxygen-containing compound	16	0.0079	ENSP00000218388,ENSP00000221930,ENSP00000257290,ENSP00000258080,ENSP00000263321,ENSP00000275493,ENSP00000283147,ENSP00000284981,ENSP00000286827,ENSP00000295834,ENSP00000345873,ENSP00000371958,ENSP00000375892,ENSP00000376457,ENSP00000411613,ENSP00000449404	AKT2,AOC1,APP,BMP6,CD9,ECT2,EGFR,FABP1,HTRA2,KRT8,PDGFRA,SLC26A3,TGFB1,TIAM1,TIMP1,TYR
GO:0003344	pericardium morphogenesis	2	0.0082	ENSP00000249749,ENSP00000386170	DLL4,TBX20
GO:0006936	muscle contraction	6	0.0082	ENSP00000211998,ENSP00000296181,ENSP00000304290,ENSP00000316029,ENSP00000386170,ENSP00000446007	CHRNB1,ITGB5,TBX20,TLN1,VCL,VIM
GO:0019221	cytokine-mediated signaling pathway	10	0.0082	ENSP00000218388,ENSP00000221930,ENSP00000242261,ENSP00000301633,ENSP00000398632,ENSP00000446007,ENSP00000446121,ENSP00000449404,ENSP00000479618,ENSP00000484824	BIRC5,CD44,KRT8,LIMS1,MUC1,MYC,TGFB1,TIMP1,TWIST1,VIM
GO:0031589	cell-substrate adhesion	5	0.0082	ENSP00000211998,ENSP00000286827,ENSP00000296181,ENSP00000301945,ENSP00000398632	ANTXR1,CD44,ITGB5,TIAM1,VCL
GO:0032881	regulation of polysaccharide metabolic process	3	0.0082	ENSP00000221930,ENSP00000345347,ENSP00000375892	AKT2,HMGB1,TGFB1
GO:0033628	regulation of cell adhesion mediated by integrin	3	0.0082	ENSP00000351209,ENSP00000361850,ENSP00000484824	EPHA2,MUC1,PLAU
GO:0042116	macrophage activation	3	0.0082	ENSP00000284981,ENSP00000315130,ENSP00000345347	APP,CLU,HMGB1
GO:0045930	negative regulation of mitotic cell cycle	6	0.0082	ENSP00000221930,ENSP00000245451,ENSP00000275493,ENSP00000301633,ENSP00000377536,ENSP00000484824	BIRC5,BMP4,EGFR,MUC1,PTTG1,TGFB1
GO:0060443	mammary gland morphogenesis	3	0.0082	ENSP00000221930,ENSP00000245451,ENSP00000351209	BMP4,EPHA2,TGFB1
GO:1901201	regulation of extracellular matrix assembly	2	0.0082	ENSP00000221930,ENSP00000301945	ANTXR1,TGFB1
GO:1902743	regulation of lamellipodium organization	3	0.0082	ENSP00000248444,ENSP00000351209,ENSP00000398632	CD44,EPHA2,VIL1
GO:2000379	positive regulation of reactive oxygen species metabolic process	4	0.0082	ENSP00000221930,ENSP00000275493,ENSP00000284981,ENSP00000315130	APP,CLU,EGFR,TGFB1
GO:0045666	positive regulation of neuron differentiation	7	0.0083	ENSP00000245451,ENSP00000283147,ENSP00000284981,ENSP00000286827,ENSP00000368169,ENSP00000376457,ENSP00000454157	APP,BMP4,BMP6,DVL1,ECT2,TIAM1,ZEB2
GO:0048598	embryonic morphogenesis	9	0.0083	ENSP00000221930,ENSP00000242261,ENSP00000245451,ENSP00000249749,ENSP00000257290,ENSP00000296181,ENSP00000368169,ENSP00000386170,ENSP00000454157	BMP4,DLL4,DVL1,ITGB5,PDGFRA,TBX20,TGFB1,TWIST1,ZEB2
GO:0010595	positive regulation of endothelial cell migration	4	0.0086	ENSP00000221930,ENSP00000245451,ENSP00000317272,ENSP00000345347	BMP4,HMGB1,MET,TGFB1
GO:2001243	negative regulation of intrinsic apoptotic signaling pathway	4	0.0086	ENSP00000258080,ENSP00000315130,ENSP00000398632,ENSP00000484824	CD44,CLU,HTRA2,MUC1
GO:0043009	chordate embryonic development	9	0.0087	ENSP00000221930,ENSP00000242261,ENSP00000245451,ENSP00000257290,ENSP00000275493,ENSP00000355124,ENSP00000368169,ENSP00000449404,ENSP00000454157	BMP4,DVL1,EGFR,KRT19,KRT8,PDGFRA,TGFB1,TWIST1,ZEB2
GO:0090596	sensory organ morphogenesis	6	0.0087	ENSP00000242261,ENSP00000245451,ENSP00000293599,ENSP00000351209,ENSP00000368169,ENSP00000426809	AQP5,BMP4,DVL1,EPHA2,PROM1,TWIST1
GO:0010638	positive regulation of organelle organization	9	0.0089	ENSP00000221930,ENSP00000248444,ENSP00000258080,ENSP00000301633,ENSP00000317272,ENSP00000341483,ENSP00000348838,ENSP00000375892,ENSP00000484824	AKT2,BIRC5,HTRA2,MET,MUC1,RANBP3,TGFB1,UBE2C,VIL1
GO:0014066	regulation of phosphatidylinositol 3-kinase signaling	4	0.0089	ENSP00000242261,ENSP00000257290,ENSP00000267101,ENSP00000275493	EGFR,ERBB3,PDGFRA,TWIST1
GO:0031032	actomyosin structure organization	4	0.0089	ENSP00000257290,ENSP00000296181,ENSP00000355124,ENSP00000449404	ITGB5,KRT19,KRT8,PDGFRA
GO:0031331	positive regulation of cellular catabolic process	7	0.0089	ENSP00000242261,ENSP00000284981,ENSP00000295834,ENSP00000315130,ENSP00000345347,ENSP00000368169,ENSP00000375892	AKT2,APP,CLU,DVL1,FABP1,HMGB1,TWIST1
GO:0051983	regulation of chromosome segregation	4	0.0089	ENSP00000301633,ENSP00000348838,ENSP00000376457,ENSP00000377536	BIRC5,ECT2,PTTG1,UBE2C
GO:0046328	regulation of JNK cascade	5	0.0092	ENSP00000275493,ENSP00000284981,ENSP00000286827,ENSP00000345347,ENSP00000454157	APP,EGFR,HMGB1,TIAM1,ZEB2
GO:0048143	astrocyte activation	2	0.0092	ENSP00000275493,ENSP00000284981	APP,EGFR
GO:0048812	neuron projection morphogenesis	8	0.0092	ENSP00000211998,ENSP00000255448,ENSP00000269571,ENSP00000275493,ENSP00000284981,ENSP00000286827,ENSP00000368169,ENSP00000454157	APP,DCLK1,DVL1,EGFR,ERBB2,TIAM1,VCL,ZEB2
GO:0060433	bronchus development	2	0.0092	ENSP00000245451,ENSP00000391490	AGR2,BMP4
GO:0071639	positive regulation of monocyte chemotactic protein-1 production	2	0.0092	ENSP00000242261,ENSP00000345347	HMGB1,TWIST1
GO:1903054	negative regulation of extracellular matrix organization	2	0.0092	ENSP00000221930,ENSP00000301945	ANTXR1,TGFB1
GO:1905207	regulation of cardiocyte differentiation	3	0.0092	ENSP00000221930,ENSP00000245451,ENSP00000275493	BMP4,EGFR,TGFB1
GO:2000392	regulation of lamellipodium morphogenesis	2	0.0092	ENSP00000248444,ENSP00000398632	CD44,VIL1
GO:0032147	activation of protein kinase activity	7	0.0093	ENSP00000221930,ENSP00000245451,ENSP00000267101,ENSP00000275493,ENSP00000284981,ENSP00000345347,ENSP00000376457	APP,BMP4,ECT2,EGFR,ERBB3,HMGB1,TGFB1
GO:0045862	positive regulation of proteolysis	7	0.0093	ENSP00000258080,ENSP00000284981,ENSP00000301945,ENSP00000315130,ENSP00000345347,ENSP00000368169,ENSP00000479618	ANTXR1,APP,CLU,DVL1,HMGB1,HTRA2,MYC
GO:0030260	entry into host cell	4	0.0096	ENSP00000275493,ENSP00000296181,ENSP00000317272,ENSP00000351209	EGFR,EPHA2,ITGB5,MET
GO:0045843	negative regulation of striated muscle tissue development	3	0.0096	ENSP00000221930,ENSP00000242261,ENSP00000245451	BMP4,TGFB1,TWIST1
GO:1904591	positive regulation of protein import	3	0.0096	ENSP00000221930,ENSP00000284981,ENSP00000376457	APP,ECT2,TGFB1
GO:0031323	regulation of cellular metabolic process	43	0.0099	ENSP00000218388,ENSP00000221930,ENSP00000242261,ENSP00000245451,ENSP00000248444,ENSP00000249749,ENSP00000257290,ENSP00000258080,ENSP00000263735,ENSP00000264094,ENSP00000267101,ENSP00000269571,ENSP00000275493,ENSP00000283147,ENSP00000284981,ENSP00000286827,ENSP00000295834,ENSP00000301633,ENSP00000301945,ENSP00000315130,ENSP00000317272,ENSP00000329137,ENSP00000331678,ENSP00000345347,ENSP00000345873…	ADORA3,AKT2,ANTXR1,APP,BIRC5,BMI1,BMP4,BMP6,CD44,CLU,DLL4,DVL1,ECT2,EGFR,EPCAM,EPHA2,ERBB2,ERBB3,FABP1,FAM132A,GUCA2A,HMGB1,HTRA2,LIMS1,LOXL3,MET,MUC1,MYC,PDGFRA,PKP3,PTTG1,SERPINB5,SLC26A3,TBX20,TGFB1,TIAM1,TIMP1,TWIST1,UBE2C,UGT1A9,VIL1,VIM,ZEB2
GO:0002573	myeloid leukocyte differentiation	4	0.0101	ENSP00000221930,ENSP00000245451,ENSP00000284981,ENSP00000351209	APP,BMP4,EPHA2,TGFB1
GO:0031327	negative regulation of cellular biosynthetic process	16	0.0101	ENSP00000221930,ENSP00000242261,ENSP00000245451,ENSP00000249749,ENSP00000264094,ENSP00000283147,ENSP00000284981,ENSP00000301633,ENSP00000329137,ENSP00000345347,ENSP00000365851,ENSP00000386170,ENSP00000446121,ENSP00000454157,ENSP00000479618,ENSP00000484824	APP,BIRC5,BMI1,BMP4,BMP6,DLL4,FAM132A,HMGB1,LIMS1,LOXL3,MUC1,MYC,TBX20,TGFB1,TWIST1,ZEB2
GO:0048701	embryonic cranial skeleton morphogenesis	3	0.0101	ENSP00000242261,ENSP00000245451,ENSP00000257290	BMP4,PDGFRA,TWIST1
GO:0000122	negative regulation of transcription by RNA polymerase II	11	0.0103	ENSP00000221930,ENSP00000242261,ENSP00000245451,ENSP00000249749,ENSP00000283147,ENSP00000284981,ENSP00000345347,ENSP00000365851,ENSP00000386170,ENSP00000454157,ENSP00000479618	APP,BMI1,BMP4,BMP6,DLL4,HMGB1,MYC,TBX20,TGFB1,TWIST1,ZEB2
GO:0006721	terpenoid metabolic process	4	0.0103	ENSP00000258080,ENSP00000275493,ENSP00000297785,ENSP00000346768	ALDH1A1,EGFR,HTRA2,UGT1A9
GO:0016032	viral process	9	0.0103	ENSP00000221930,ENSP00000257290,ENSP00000275493,ENSP00000296181,ENSP00000316029,ENSP00000351209,ENSP00000355124,ENSP00000446007,ENSP00000449404	EGFR,EPHA2,ITGB5,KRT19,KRT8,PDGFRA,TGFB1,TLN1,VIM
GO:0061154	endothelial tube morphogenesis	2	0.0103	ENSP00000245451,ENSP00000249749	BMP4,DLL4
GO:1902004	positive regulation of amyloid-beta formation	2	0.0103	ENSP00000284981,ENSP00000315130	APP,CLU
GO:1902105	regulation of leukocyte differentiation	6	0.0103	ENSP00000221930,ENSP00000245451,ENSP00000264094,ENSP00000269571,ENSP00000345347,ENSP00000479618	BMP4,ERBB2,HMGB1,LOXL3,MYC,TGFB1
GO:0048534	hematopoietic or lymphoid organ development	9	0.0105	ENSP00000221930,ENSP00000245451,ENSP00000249749,ENSP00000257290,ENSP00000263321,ENSP00000284981,ENSP00000345347,ENSP00000351209,ENSP00000365851	APP,BMI1,BMP4,DLL4,EPHA2,HMGB1,PDGFRA,TGFB1,TYR
GO:0010952	positive regulation of peptidase activity	5	0.0107	ENSP00000258080,ENSP00000284981,ENSP00000301945,ENSP00000345347,ENSP00000479618	ANTXR1,APP,HMGB1,HTRA2,MYC
GO:0033138	positive regulation of peptidyl-serine phosphorylation	4	0.0107	ENSP00000221930,ENSP00000275493,ENSP00000284981,ENSP00000398632	APP,CD44,EGFR,TGFB1
GO:0002064	epithelial cell development	5	0.0109	ENSP00000245451,ENSP00000283147,ENSP00000317272,ENSP00000351209,ENSP00000446007	BMP4,BMP6,EPHA2,MET,VIM
GO:0019222	regulation of metabolic process	45	0.0112	ENSP00000218388,ENSP00000221930,ENSP00000242261,ENSP00000245451,ENSP00000248444,ENSP00000249749,ENSP00000257290,ENSP00000258080,ENSP00000263735,ENSP00000264094,ENSP00000267101,ENSP00000269571,ENSP00000275493,ENSP00000283147,ENSP00000284981,ENSP00000286827,ENSP00000295834,ENSP00000301633,ENSP00000301945,ENSP00000315130,ENSP00000317272,ENSP00000329137,ENSP00000331678,ENSP00000345347,ENSP00000345873…	ADORA3,AGR2,AKT2,ANTXR1,APP,BIRC5,BMI1,BMP4,BMP6,CD44,CLU,DLL4,DVL1,ECT2,EGFR,EPCAM,EPHA2,ERBB2,ERBB3,FABP1,FAM132A,GUCA2A,HMGB1,HTRA2,LIMS1,LOXL3,MET,MUC1,MYC,PDGFRA,PKP3,PTTG1,SERPINB5,SLC26A3,TBX20,TGFB1,TIAM1,TIMP1,TSPAN8,TWIST1,UBE2C,UGT1A9,VIL1,VIM,ZEB2
GO:0022411	cellular component disassembly	7	0.0113	ENSP00000218388,ENSP00000248444,ENSP00000260302,ENSP00000345347,ENSP00000368169,ENSP00000398632,ENSP00000479618	CD44,DVL1,HMGB1,MMP13,MYC,TIMP1,VIL1
GO:0010862	positive regulation of pathway-restricted SMAD protein phosphorylation	3	0.0114	ENSP00000221930,ENSP00000245451,ENSP00000283147	BMP4,BMP6,TGFB1
GO:0045912	negative regulation of carbohydrate metabolic process	3	0.0114	ENSP00000221930,ENSP00000329137,ENSP00000346768	FAM132A,TGFB1,UGT1A9
GO:0043217	myelin maintenance	2	0.0115	ENSP00000315130,ENSP00000375892	AKT2,CLU
GO:0051146	striated muscle cell differentiation	5	0.0115	ENSP00000245451,ENSP00000257290,ENSP00000304290,ENSP00000355124,ENSP00000449404	BMP4,CHRNB1,KRT19,KRT8,PDGFRA
GO:1901722	regulation of cell proliferation involved in kidney development	2	0.0115	ENSP00000245451,ENSP00000479618	BMP4,MYC
GO:0010811	positive regulation of cell-substrate adhesion	4	0.0119	ENSP00000219022,ENSP00000367154,ENSP00000391490,ENSP00000446121	AGR2,LIMS1,OLFM4,RSU1
GO:0010823	negative regulation of mitochondrion organization	3	0.0119	ENSP00000258080,ENSP00000284981,ENSP00000315130	APP,CLU,HTRA2
GO:0035065	regulation of histone acetylation	3	0.0125	ENSP00000221930,ENSP00000242261,ENSP00000484824	MUC1,TGFB1,TWIST1
GO:0006979	response to oxidative stress	7	0.0126	ENSP00000257290,ENSP00000258080,ENSP00000275493,ENSP00000284981,ENSP00000295834,ENSP00000374265,ENSP00000376457	APP,ECT2,EGFR,FABP1,GPX2,HTRA2,PDGFRA
GO:0016310	phosphorylation	14	0.0126	ENSP00000221930,ENSP00000245451,ENSP00000255448,ENSP00000257290,ENSP00000267101,ENSP00000269571,ENSP00000275493,ENSP00000284981,ENSP00000301633,ENSP00000301634,ENSP00000317272,ENSP00000351209,ENSP00000375892,ENSP00000479618	AKT2,APP,BIRC5,BMP4,DCLK1,EGFR,EPHA2,ERBB2,ERBB3,MET,MYC,PDGFRA,TGFB1,TK1
GO:0003323	type B pancreatic cell development	2	0.0129	ENSP00000245451,ENSP00000283147	BMP4,BMP6
GO:0007173	epidermal growth factor receptor signaling pathway	3	0.0129	ENSP00000221930,ENSP00000248444,ENSP00000275493	EGFR,TGFB1,VIL1
GO:0009415	response to water	2	0.0129	ENSP00000371958,ENSP00000449404	CD9,KRT8
GO:0032835	glomerulus development	3	0.0129	ENSP00000245451,ENSP00000257290,ENSP00000426809	BMP4,PDGFRA,PROM1
GO:0045765	regulation of angiogenesis	6	0.0129	ENSP00000242261,ENSP00000249749,ENSP00000269571,ENSP00000314151,ENSP00000345347,ENSP00000351209	DLL4,EPHA2,ERBB2,HMGB1,KLK3,TWIST1
GO:0045944	positive regulation of transcription by RNA polymerase II	13	0.0129	ENSP00000221930,ENSP00000242261,ENSP00000245451,ENSP00000263735,ENSP00000275493,ENSP00000283147,ENSP00000284981,ENSP00000317272,ENSP00000345347,ENSP00000386170,ENSP00000454157,ENSP00000479618,ENSP00000484824	APP,BMP4,BMP6,EGFR,EPCAM,HMGB1,MET,MUC1,MYC,TBX20,TGFB1,TWIST1,ZEB2
GO:0048642	negative regulation of skeletal muscle tissue development	2	0.0129	ENSP00000221930,ENSP00000242261	TGFB1,TWIST1
GO:0061029	eyelid development in camera-type eye	2	0.0129	ENSP00000242261,ENSP00000275493	EGFR,TWIST1
GO:0070268	cornification	4	0.0129	ENSP00000167588,ENSP00000331678,ENSP00000355124,ENSP00000449404	KRT19,KRT20,KRT8,PKP3
GO:0070307	lens fiber cell development	2	0.0129	ENSP00000351209,ENSP00000446007	EPHA2,VIM
GO:1905048	regulation of metallopeptidase activity	2	0.0129	ENSP00000218388,ENSP00000301945	ANTXR1,TIMP1
GO:2001044	regulation of integrin-mediated signaling pathway	2	0.0129	ENSP00000218388,ENSP00000264094	LOXL3,TIMP1
GO:0007178	transmembrane receptor protein serine/threonine kinase signaling pathway	5	0.013	ENSP00000221930,ENSP00000245451,ENSP00000283147,ENSP00000296181,ENSP00000446007	BMP4,BMP6,ITGB5,TGFB1,VIM
GO:0010810	regulation of cell-substrate adhesion	5	0.013	ENSP00000219022,ENSP00000361850,ENSP00000367154,ENSP00000391490,ENSP00000446121	AGR2,LIMS1,OLFM4,PLAU,RSU1
GO:0042476	odontogenesis	4	0.0131	ENSP00000242261,ENSP00000245451,ENSP00000257290,ENSP00000293599	AQP5,BMP4,PDGFRA,TWIST1
GO:0007507	heart development	8	0.0132	ENSP00000221930,ENSP00000242261,ENSP00000245451,ENSP00000249749,ENSP00000257290,ENSP00000267101,ENSP00000269571,ENSP00000386170	BMP4,DLL4,ERBB2,ERBB3,PDGFRA,TBX20,TGFB1,TWIST1
GO:0010965	regulation of mitotic sister chromatid separation	3	0.0133	ENSP00000301633,ENSP00000348838,ENSP00000377536	BIRC5,PTTG1,UBE2C
GO:0043388	positive regulation of DNA binding	3	0.0133	ENSP00000221930,ENSP00000242261,ENSP00000345347	HMGB1,TGFB1,TWIST1
GO:0032102	negative regulation of response to external stimulus	6	0.0136	ENSP00000257290,ENSP00000329137,ENSP00000361850,ENSP00000368169,ENSP00000371958,ENSP00000377003	CD9,DVL1,FAM132A,PDGFRA,PLAU,TSPAN8
GO:0043065	positive regulation of apoptotic process	9	0.0138	ENSP00000221930,ENSP00000245451,ENSP00000258080,ENSP00000284981,ENSP00000286827,ENSP00000315130,ENSP00000345347,ENSP00000376457,ENSP00000479618	APP,BMP4,CLU,ECT2,HMGB1,HTRA2,MYC,TGFB1,TIAM1
GO:0051171	regulation of nitrogen compound metabolic process	41	0.0138	ENSP00000218388,ENSP00000221930,ENSP00000242261,ENSP00000245451,ENSP00000248444,ENSP00000249749,ENSP00000257290,ENSP00000258080,ENSP00000263735,ENSP00000264094,ENSP00000267101,ENSP00000269571,ENSP00000275493,ENSP00000283147,ENSP00000284981,ENSP00000286827,ENSP00000295834,ENSP00000301633,ENSP00000301945,ENSP00000315130,ENSP00000317272,ENSP00000331678,ENSP00000345347,ENSP00000345873,ENSP00000348838…	ADORA3,AKT2,ANTXR1,APP,BIRC5,BMI1,BMP4,BMP6,CD44,CLU,DLL4,DVL1,ECT2,EGFR,EPCAM,EPHA2,ERBB2,ERBB3,FABP1,GUCA2A,HMGB1,HTRA2,LIMS1,LOXL3,MET,MUC1,MYC,PDGFRA,PKP3,PTTG1,SERPINB5,SLC26A3,TBX20,TGFB1,TIAM1,TIMP1,TWIST1,UBE2C,VIL1,VIM,ZEB2
GO:0071214	cellular response to abiotic stimulus	6	0.0138	ENSP00000221930,ENSP00000275493,ENSP00000283147,ENSP00000375892,ENSP00000376457,ENSP00000479618	AKT2,BMP6,ECT2,EGFR,MYC,TGFB1
GO:0010035	response to inorganic substance	8	0.0139	ENSP00000275493,ENSP00000283147,ENSP00000284981,ENSP00000295834,ENSP00000371958,ENSP00000376457,ENSP00000411613,ENSP00000449404	AOC1,APP,BMP6,CD9,ECT2,EGFR,FABP1,KRT8
GO:0043518	negative regulation of DNA damage response, signal transduction by p53 class mediator	2	0.0141	ENSP00000242261,ENSP00000398632	CD44,TWIST1
GO:0051046	regulation of secretion	10	0.0141	ENSP00000167588,ENSP00000221930,ENSP00000242261,ENSP00000267101,ENSP00000275493,ENSP00000283147,ENSP00000286827,ENSP00000329137,ENSP00000345347,ENSP00000351632	BMP6,EGFR,ERBB3,FAM132A,FAM3D,HMGB1,KRT20,TGFB1,TIAM1,TWIST1
GO:0007346	regulation of mitotic cell cycle	9	0.0142	ENSP00000221930,ENSP00000245451,ENSP00000275493,ENSP00000284981,ENSP00000301633,ENSP00000341483,ENSP00000348838,ENSP00000377536,ENSP00000484824	APP,BIRC5,BMP4,EGFR,MUC1,PTTG1,RANBP3,TGFB1,UBE2C
GO:0050767	regulation of neurogenesis	10	0.0143	ENSP00000221930,ENSP00000245451,ENSP00000249749,ENSP00000283147,ENSP00000284981,ENSP00000286827,ENSP00000368169,ENSP00000376457,ENSP00000446007,ENSP00000454157	APP,BMP4,BMP6,DLL4,DVL1,ECT2,TGFB1,TIAM1,VIM,ZEB2
GO:0061180	mammary gland epithelium development	3	0.0144	ENSP00000221930,ENSP00000351209,ENSP00000375892	AKT2,EPHA2,TGFB1
GO:0007160	cell-matrix adhesion	4	0.0152	ENSP00000211998,ENSP00000286827,ENSP00000296181,ENSP00000398632	CD44,ITGB5,TIAM1,VCL
GO:0031175	neuron projection development	9	0.0153	ENSP00000211998,ENSP00000255448,ENSP00000269571,ENSP00000275493,ENSP00000284981,ENSP00000286827,ENSP00000345347,ENSP00000368169,ENSP00000454157	APP,DCLK1,DVL1,EGFR,ERBB2,HMGB1,TIAM1,VCL,ZEB2
GO:0016266	O-glycan processing	3	0.0157	ENSP00000364150,ENSP00000484824,ENSP00000485028	GALNT12,MUC1,MUC13
GO:0042130	negative regulation of T cell proliferation	3	0.0157	ENSP00000221930,ENSP00000245451,ENSP00000269571	BMP4,ERBB2,TGFB1
GO:0050765	negative regulation of phagocytosis	2	0.0157	ENSP00000221930,ENSP00000345347	HMGB1,TGFB1
GO:0090136	epithelial cell-cell adhesion	2	0.0157	ENSP00000211998,ENSP00000296181	ITGB5,VCL
GO:1902166	negative regulation of intrinsic apoptotic signaling pathway in response to DNA damage by p53 class mediator	2	0.0157	ENSP00000398632,ENSP00000484824	CD44,MUC1
GO:0055002	striated muscle cell development	4	0.0159	ENSP00000257290,ENSP00000304290,ENSP00000355124,ENSP00000449404	CHRNB1,KRT19,KRT8,PDGFRA
GO:0072006	nephron development	4	0.0159	ENSP00000245451,ENSP00000257290,ENSP00000426809,ENSP00000479618	BMP4,MYC,PDGFRA,PROM1
GO:0030111	regulation of Wnt signaling pathway	6	0.016	ENSP00000266674,ENSP00000275493,ENSP00000284981,ENSP00000286827,ENSP00000368169,ENSP00000454157	APP,DVL1,EGFR,LGR5,TIAM1,ZEB2
GO:0033157	regulation of intracellular protein transport	5	0.016	ENSP00000221930,ENSP00000245451,ENSP00000269571,ENSP00000375892,ENSP00000376457	AKT2,BMP4,ECT2,ERBB2,TGFB1
GO:0060255	regulation of macromolecule metabolic process	42	0.016	ENSP00000218388,ENSP00000221930,ENSP00000242261,ENSP00000245451,ENSP00000248444,ENSP00000249749,ENSP00000257290,ENSP00000258080,ENSP00000263735,ENSP00000264094,ENSP00000267101,ENSP00000269571,ENSP00000275493,ENSP00000283147,ENSP00000284981,ENSP00000286827,ENSP00000295834,ENSP00000301633,ENSP00000301945,ENSP00000315130,ENSP00000317272,ENSP00000331678,ENSP00000345347,ENSP00000345873,ENSP00000348838…	ADORA3,AGR2,AKT2,ANTXR1,APP,BIRC5,BMI1,BMP4,BMP6,CD44,CLU,DLL4,DVL1,ECT2,EGFR,EPCAM,EPHA2,ERBB2,ERBB3,FABP1,HMGB1,HTRA2,LIMS1,LOXL3,MET,MUC1,MYC,PDGFRA,PKP3,PTTG1,SERPINB5,SLC26A3,TBX20,TGFB1,TIAM1,TIMP1,TSPAN8,TWIST1,UBE2C,VIL1,VIM,ZEB2
GO:0001936	regulation of endothelial cell proliferation	4	0.0161	ENSP00000245451,ENSP00000249749,ENSP00000283147,ENSP00000345347	BMP4,BMP6,DLL4,HMGB1
GO:0014070	response to organic cyclic compound	11	0.0161	ENSP00000221930,ENSP00000244930,ENSP00000245451,ENSP00000263321,ENSP00000275493,ENSP00000283147,ENSP00000284981,ENSP00000286827,ENSP00000345347,ENSP00000345873,ENSP00000411613	AOC1,APP,BMP4,BMP6,EGFR,HMGB1,SCGB2A1,SLC26A3,TGFB1,TIAM1,TYR
GO:0022617	extracellular matrix disassembly	3	0.0161	ENSP00000218388,ENSP00000260302,ENSP00000398632	CD44,MMP13,TIMP1
GO:0031333	negative regulation of protein complex assembly	4	0.0161	ENSP00000248444,ENSP00000315130,ENSP00000345347,ENSP00000386170	CLU,HMGB1,TBX20,VIL1
GO:0097190	apoptotic signaling pathway	6	0.0163	ENSP00000221930,ENSP00000258080,ENSP00000267101,ENSP00000315130,ENSP00000351209,ENSP00000449404	CLU,EPHA2,ERBB3,HTRA2,KRT8,TGFB1
GO:0010243	response to organonitrogen compound	11	0.0164	ENSP00000218388,ENSP00000221930,ENSP00000257290,ENSP00000263321,ENSP00000275493,ENSP00000284981,ENSP00000286827,ENSP00000345873,ENSP00000371958,ENSP00000375892,ENSP00000411613	AKT2,AOC1,APP,CD9,EGFR,PDGFRA,SLC26A3,TGFB1,TIAM1,TIMP1,TYR
GO:0030879	mammary gland development	4	0.0165	ENSP00000221930,ENSP00000245451,ENSP00000351209,ENSP00000375892	AKT2,BMP4,EPHA2,TGFB1
GO:0043280	positive regulation of cysteine-type endopeptidase activity involved in apoptotic process	4	0.0165	ENSP00000258080,ENSP00000284981,ENSP00000345347,ENSP00000479618	APP,HMGB1,HTRA2,MYC
GO:0050900	leukocyte migration	6	0.0165	ENSP00000221930,ENSP00000221992,ENSP00000263735,ENSP00000345347,ENSP00000355361,ENSP00000398632	CD44,CD47,CEACAM5,EPCAM,HMGB1,TGFB1
GO:0030239	myofibril assembly	3	0.0166	ENSP00000257290,ENSP00000355124,ENSP00000449404	KRT19,KRT8,PDGFRA
GO:0043583	ear development	5	0.0166	ENSP00000221930,ENSP00000242261,ENSP00000245451,ENSP00000266674,ENSP00000368169	BMP4,DVL1,LGR5,TGFB1,TWIST1
GO:0010817	regulation of hormone levels	8	0.0167	ENSP00000257290,ENSP00000275493,ENSP00000283147,ENSP00000286827,ENSP00000297785,ENSP00000329137,ENSP00000346768,ENSP00000351632	ALDH1A1,BMP6,EGFR,FAM132A,FAM3D,PDGFRA,TIAM1,UGT1A9
GO:0034614	cellular response to reactive oxygen species	4	0.0167	ENSP00000257290,ENSP00000275493,ENSP00000295834,ENSP00000376457	ECT2,EGFR,FABP1,PDGFRA
GO:0003184	pulmonary valve morphogenesis	2	0.0168	ENSP00000245451,ENSP00000386170	BMP4,TBX20
GO:0030214	hyaluronan catabolic process	2	0.0168	ENSP00000221930,ENSP00000398632	CD44,TGFB1
GO:0045603	positive regulation of endothelial cell differentiation	2	0.0168	ENSP00000245451,ENSP00000283147	BMP4,BMP6
GO:0045893	positive regulation of transcription, DNA-templated	15	0.0168	ENSP00000221930,ENSP00000242261,ENSP00000245451,ENSP00000263735,ENSP00000269571,ENSP00000275493,ENSP00000283147,ENSP00000284981,ENSP00000317272,ENSP00000345347,ENSP00000368169,ENSP00000386170,ENSP00000454157,ENSP00000479618,ENSP00000484824	APP,BMP4,BMP6,DVL1,EGFR,EPCAM,ERBB2,HMGB1,MET,MUC1,MYC,TBX20,TGFB1,TWIST1,ZEB2
GO:0051049	regulation of transport	17	0.0168	ENSP00000167588,ENSP00000221930,ENSP00000242261,ENSP00000245451,ENSP00000267101,ENSP00000269571,ENSP00000275493,ENSP00000283147,ENSP00000284981,ENSP00000286827,ENSP00000315130,ENSP00000329137,ENSP00000345347,ENSP00000351632,ENSP00000355361,ENSP00000375892,ENSP00000376457	AKT2,APP,BMP4,BMP6,CD47,CLU,ECT2,EGFR,ERBB2,ERBB3,FAM132A,FAM3D,HMGB1,KRT20,TGFB1,TIAM1,TWIST1
GO:0003231	cardiac ventricle development	4	0.017	ENSP00000221930,ENSP00000245451,ENSP00000249749,ENSP00000386170	BMP4,DLL4,TBX20,TGFB1
GO:0030177	positive regulation of Wnt signaling pathway	4	0.0175	ENSP00000266674,ENSP00000275493,ENSP00000368169,ENSP00000454157	DVL1,EGFR,LGR5,ZEB2
GO:0046330	positive regulation of JNK cascade	4	0.0175	ENSP00000284981,ENSP00000286827,ENSP00000345347,ENSP00000454157	APP,HMGB1,TIAM1,ZEB2
GO:0048608	reproductive structure development	7	0.0175	ENSP00000245451,ENSP00000257290,ENSP00000275493,ENSP00000283147,ENSP00000355124,ENSP00000372221,ENSP00000449404	BMP4,BMP6,EGFR,KRT19,KRT8,PDGFRA,SERPINB5
GO:0048666	neuron development	10	0.0175	ENSP00000211998,ENSP00000255448,ENSP00000258080,ENSP00000269571,ENSP00000275493,ENSP00000284981,ENSP00000286827,ENSP00000345347,ENSP00000368169,ENSP00000454157	APP,DCLK1,DVL1,EGFR,ERBB2,HMGB1,HTRA2,TIAM1,VCL,ZEB2
GO:0090316	positive regulation of intracellular protein transport	4	0.0175	ENSP00000221930,ENSP00000269571,ENSP00000375892,ENSP00000376457	AKT2,ECT2,ERBB2,TGFB1
GO:0048638	regulation of developmental growth	6	0.0176	ENSP00000245451,ENSP00000248444,ENSP00000258080,ENSP00000284981,ENSP00000386170,ENSP00000391490	AGR2,APP,BMP4,HTRA2,TBX20,VIL1
GO:0050863	regulation of T cell activation	6	0.0176	ENSP00000221930,ENSP00000245451,ENSP00000264094,ENSP00000269571,ENSP00000345347,ENSP00000355361	BMP4,CD47,ERBB2,HMGB1,LOXL3,TGFB1
GO:0003206	cardiac chamber morphogenesis	4	0.0182	ENSP00000221930,ENSP00000245451,ENSP00000249749,ENSP00000386170	BMP4,DLL4,TBX20,TGFB1
GO:0019953	sexual reproduction	10	0.0182	ENSP00000221930,ENSP00000245451,ENSP00000264670,ENSP00000266674,ENSP00000284981,ENSP00000332576,ENSP00000345873,ENSP00000371958,ENSP00000377003,ENSP00000377536	APP,BMP4,CD9,LGR5,NSUN2,OSBP2,PTTG1,SLC26A3,TGFB1,TSPAN8
GO:0045321	leukocyte activation	11	0.0183	ENSP00000211998,ENSP00000219022,ENSP00000221930,ENSP00000249749,ENSP00000284981,ENSP00000315130,ENSP00000345347,ENSP00000355361,ENSP00000361850,ENSP00000398632,ENSP00000411613	AOC1,APP,CD44,CD47,CLU,DLL4,HMGB1,OLFM4,PLAU,TGFB1,VCL
GO:0048015	phosphatidylinositol-mediated signaling	3	0.0183	ENSP00000257290,ENSP00000267101,ENSP00000269571	ERBB2,ERBB3,PDGFRA
GO:0060602	branch elongation of an epithelium	2	0.0183	ENSP00000221930,ENSP00000245451	BMP4,TGFB1
GO:0072112	glomerular visceral epithelial cell differentiation	2	0.0183	ENSP00000245451,ENSP00000426809	BMP4,PROM1
GO:0010557	positive regulation of macromolecule biosynthetic process	17	0.0188	ENSP00000221930,ENSP00000242261,ENSP00000245451,ENSP00000263735,ENSP00000269571,ENSP00000275493,ENSP00000283147,ENSP00000284981,ENSP00000317272,ENSP00000345347,ENSP00000368169,ENSP00000375892,ENSP00000386170,ENSP00000446007,ENSP00000454157,ENSP00000479618,ENSP00000484824	AKT2,APP,BMP4,BMP6,DVL1,EGFR,EPCAM,ERBB2,HMGB1,MET,MUC1,MYC,TBX20,TGFB1,TWIST1,VIM,ZEB2
GO:0030097	hemopoiesis	8	0.019	ENSP00000221930,ENSP00000245451,ENSP00000249749,ENSP00000257290,ENSP00000284981,ENSP00000345347,ENSP00000351209,ENSP00000365851	APP,BMI1,BMP4,DLL4,EPHA2,HMGB1,PDGFRA,TGFB1
GO:0043393	regulation of protein binding	5	0.019	ENSP00000245451,ENSP00000284981,ENSP00000286827,ENSP00000317272,ENSP00000368169	APP,BMP4,DVL1,MET,TIAM1
GO:0055008	cardiac muscle tissue morphogenesis	3	0.019	ENSP00000221930,ENSP00000249749,ENSP00000386170	DLL4,TBX20,TGFB1
GO:0061035	regulation of cartilage development	3	0.019	ENSP00000221930,ENSP00000245451,ENSP00000283147	BMP4,BMP6,TGFB1
GO:1905330	regulation of morphogenesis of an epithelium	4	0.019	ENSP00000221930,ENSP00000245451,ENSP00000286827,ENSP00000368169	BMP4,DVL1,TGFB1,TIAM1
GO:0034250	positive regulation of cellular amide metabolic process	4	0.0193	ENSP00000269571,ENSP00000284981,ENSP00000315130,ENSP00000446007	APP,CLU,ERBB2,VIM
GO:0035690	cellular response to drug	6	0.0193	ENSP00000221930,ENSP00000275493,ENSP00000295834,ENSP00000376457,ENSP00000411613,ENSP00000479618	AOC1,ECT2,EGFR,FABP1,MYC,TGFB1
GO:0098609	cell-cell adhesion	7	0.0195	ENSP00000211998,ENSP00000221992,ENSP00000257290,ENSP00000263735,ENSP00000275493,ENSP00000296181,ENSP00000398632	CD44,CEACAM5,EGFR,EPCAM,ITGB5,PDGFRA,VCL
GO:0010544	negative regulation of platelet activation	2	0.0197	ENSP00000257290,ENSP00000371958	CD9,PDGFRA
GO:0032941	secretion by tissue	2	0.0197	ENSP00000293599,ENSP00000391490	AGR2,AQP5
GO:2000727	positive regulation of cardiac muscle cell differentiation	2	0.0197	ENSP00000221930,ENSP00000245451	BMP4,TGFB1
GO:0002521	leukocyte differentiation	6	0.0199	ENSP00000221930,ENSP00000245451,ENSP00000249749,ENSP00000284981,ENSP00000345347,ENSP00000351209	APP,BMP4,DLL4,EPHA2,HMGB1,TGFB1
GO:0010675	regulation of cellular carbohydrate metabolic process	4	0.02	ENSP00000329137,ENSP00000345347,ENSP00000346768,ENSP00000375892	AKT2,FAM132A,HMGB1,UGT1A9
GO:0042306	regulation of protein import into nucleus	3	0.0201	ENSP00000221930,ENSP00000245451,ENSP00000376457	BMP4,ECT2,TGFB1
GO:1903201	regulation of oxidative stress-induced cell death	3	0.0201	ENSP00000258080,ENSP00000284981,ENSP00000317272	APP,HTRA2,MET
GO:2001234	negative regulation of apoptotic signaling pathway	5	0.0202	ENSP00000245451,ENSP00000258080,ENSP00000315130,ENSP00000398632,ENSP00000484824	BMP4,CD44,CLU,HTRA2,MUC1
GO:0009314	response to radiation	7	0.0212	ENSP00000221930,ENSP00000263321,ENSP00000275493,ENSP00000284981,ENSP00000375892,ENSP00000376457,ENSP00000479618	AKT2,APP,ECT2,EGFR,MYC,TGFB1,TYR
GO:0010770	positive regulation of cell morphogenesis involved in differentiation	4	0.0212	ENSP00000219022,ENSP00000286827,ENSP00000446121,ENSP00000454157	LIMS1,OLFM4,TIAM1,ZEB2
GO:0015669	gas transport	2	0.0212	ENSP00000293599,ENSP00000479618	AQP5,MYC
GO:0043254	regulation of protein complex assembly	7	0.0212	ENSP00000221930,ENSP00000242261,ENSP00000248444,ENSP00000315130,ENSP00000317272,ENSP00000345347,ENSP00000386170	CLU,HMGB1,MET,TBX20,TGFB1,TWIST1,VIL1
GO:0070875	positive regulation of glycogen metabolic process	2	0.0212	ENSP00000345347,ENSP00000375892	AKT2,HMGB1
GO:0032760	positive regulation of tumor necrosis factor production	3	0.0213	ENSP00000242261,ENSP00000315130,ENSP00000345347	CLU,HMGB1,TWIST1
GO:0040008	regulation of growth	9	0.0216	ENSP00000221930,ENSP00000245451,ENSP00000248444,ENSP00000258080,ENSP00000269571,ENSP00000275493,ENSP00000284981,ENSP00000386170,ENSP00000391490	AGR2,APP,BMP4,EGFR,ERBB2,HTRA2,TBX20,TGFB1,VIL1
GO:0044703	multi-organism reproductive process	11	0.0216	ENSP00000221930,ENSP00000245451,ENSP00000264670,ENSP00000266674,ENSP00000284981,ENSP00000332576,ENSP00000345873,ENSP00000371958,ENSP00000377003,ENSP00000377536,ENSP00000385706	APP,BMP4,CD9,LGR5,NSUN2,OSBP2,PSG2,PTTG1,SLC26A3,TGFB1,TSPAN8
GO:0007422	peripheral nervous system development	3	0.022	ENSP00000267101,ENSP00000269571,ENSP00000375892	AKT2,ERBB2,ERBB3
GO:0051384	response to glucocorticoid	4	0.022	ENSP00000221930,ENSP00000275493,ENSP00000283147,ENSP00000345347	BMP6,EGFR,HMGB1,TGFB1
GO:0061333	renal tubule morphogenesis	3	0.022	ENSP00000245451,ENSP00000266674,ENSP00000479618	BMP4,LGR5,MYC
GO:0001101	response to acid chemical	6	0.0223	ENSP00000257290,ENSP00000258080,ENSP00000275493,ENSP00000283147,ENSP00000371958,ENSP00000449404	BMP6,CD9,EGFR,HTRA2,KRT8,PDGFRA
GO:0001774	microglial cell activation	2	0.0226	ENSP00000284981,ENSP00000315130	APP,CLU
GO:0002089	lens morphogenesis in camera-type eye	2	0.0226	ENSP00000245451,ENSP00000351209	BMP4,EPHA2
GO:0023019	signal transduction involved in regulation of gene expression	2	0.0226	ENSP00000257290,ENSP00000263735	EPCAM,PDGFRA
GO:0040014	regulation of multicellular organism growth	3	0.0226	ENSP00000248444,ENSP00000258080,ENSP00000284981	APP,HTRA2,VIL1
GO:0043371	negative regulation of CD4-positive, alpha-beta T cell differentiation	2	0.0226	ENSP00000264094,ENSP00000345347	HMGB1,LOXL3
GO:0048545	response to steroid hormone	6	0.0226	ENSP00000221930,ENSP00000244930,ENSP00000245451,ENSP00000275493,ENSP00000283147,ENSP00000345347	BMP4,BMP6,EGFR,HMGB1,SCGB2A1,TGFB1
GO:0050764	regulation of phagocytosis	3	0.0226	ENSP00000221930,ENSP00000345347,ENSP00000355361	CD47,HMGB1,TGFB1
GO:0007281	germ cell development	5	0.0235	ENSP00000245451,ENSP00000264670,ENSP00000266674,ENSP00000332576,ENSP00000345873	BMP4,LGR5,NSUN2,OSBP2,SLC26A3
GO:0030100	regulation of endocytosis	5	0.0235	ENSP00000221930,ENSP00000284981,ENSP00000315130,ENSP00000345347,ENSP00000355361	APP,CD47,CLU,HMGB1,TGFB1
GO:0003151	outflow tract morphogenesis	3	0.024	ENSP00000242261,ENSP00000245451,ENSP00000386170	BMP4,TBX20,TWIST1
GO:0030225	macrophage differentiation	2	0.024	ENSP00000245451,ENSP00000284981	APP,BMP4
GO:0060444	branching involved in mammary gland duct morphogenesis	2	0.024	ENSP00000221930,ENSP00000351209	EPHA2,TGFB1
GO:0072359	circulatory system development	10	0.024	ENSP00000221930,ENSP00000242261,ENSP00000245451,ENSP00000249749,ENSP00000257290,ENSP00000267101,ENSP00000269571,ENSP00000301945,ENSP00000351209,ENSP00000386170	ANTXR1,BMP4,DLL4,EPHA2,ERBB2,ERBB3,PDGFRA,TBX20,TGFB1,TWIST1
GO:0090026	positive regulation of monocyte chemotaxis	2	0.024	ENSP00000284981,ENSP00000345347	APP,HMGB1
GO:0001942	hair follicle development	3	0.0247	ENSP00000264670,ENSP00000266674,ENSP00000275493	EGFR,LGR5,NSUN2
GO:0003208	cardiac ventricle morphogenesis	3	0.0247	ENSP00000221930,ENSP00000249749,ENSP00000386170	DLL4,TBX20,TGFB1
GO:0022604	regulation of cell morphogenesis	7	0.0247	ENSP00000219022,ENSP00000248444,ENSP00000286827,ENSP00000368169,ENSP00000398632,ENSP00000446121,ENSP00000454157	CD44,DVL1,LIMS1,OLFM4,TIAM1,VIL1,ZEB2
GO:0003007	heart morphogenesis	5	0.0256	ENSP00000221930,ENSP00000242261,ENSP00000245451,ENSP00000249749,ENSP00000386170	BMP4,DLL4,TBX20,TGFB1,TWIST1
GO:0001773	myeloid dendritic cell activation	2	0.0258	ENSP00000221930,ENSP00000345347	HMGB1,TGFB1
GO:0045109	intermediate filament organization	2	0.0258	ENSP00000167588,ENSP00000446007	KRT20,VIM
GO:0071345	cellular response to cytokine stimulus	11	0.0259	ENSP00000218388,ENSP00000221930,ENSP00000242261,ENSP00000258080,ENSP00000301633,ENSP00000398632,ENSP00000446007,ENSP00000446121,ENSP00000449404,ENSP00000479618,ENSP00000484824	BIRC5,CD44,HTRA2,KRT8,LIMS1,MUC1,MYC,TGFB1,TIMP1,TWIST1,VIM
GO:0050730	regulation of peptidyl-tyrosine phosphorylation	5	0.0262	ENSP00000221930,ENSP00000267101,ENSP00000275493,ENSP00000284981,ENSP00000398632	APP,CD44,EGFR,ERBB3,TGFB1
GO:0060322	head development	9	0.0264	ENSP00000221930,ENSP00000245451,ENSP00000255448,ENSP00000257290,ENSP00000258080,ENSP00000275493,ENSP00000284981,ENSP00000371958,ENSP00000454157	APP,BMP4,CD9,DCLK1,EGFR,HTRA2,PDGFRA,TGFB1,ZEB2
GO:0001935	endothelial cell proliferation	2	0.0274	ENSP00000245451,ENSP00000345347	BMP4,HMGB1
GO:0030539	male genitalia development	2	0.0274	ENSP00000257290,ENSP00000283147	BMP6,PDGFRA
GO:0072215	regulation of metanephros development	2	0.0274	ENSP00000245451,ENSP00000479618	BMP4,MYC
GO:0090189	regulation of branching involved in ureteric bud morphogenesis	2	0.0274	ENSP00000221930,ENSP00000245451	BMP4,TGFB1
GO:0031334	positive regulation of protein complex assembly	5	0.0275	ENSP00000221930,ENSP00000242261,ENSP00000248444,ENSP00000315130,ENSP00000317272	CLU,MET,TGFB1,TWIST1,VIL1
GO:0042129	regulation of T cell proliferation	4	0.0277	ENSP00000221930,ENSP00000245451,ENSP00000269571,ENSP00000345347	BMP4,ERBB2,HMGB1,TGFB1
GO:0007409	axonogenesis	6	0.0286	ENSP00000211998,ENSP00000255448,ENSP00000269571,ENSP00000284981,ENSP00000368169,ENSP00000454157	APP,DCLK1,DVL1,ERBB2,VCL,ZEB2
GO:0071478	cellular response to radiation	4	0.0288	ENSP00000221930,ENSP00000375892,ENSP00000376457,ENSP00000479618	AKT2,ECT2,MYC,TGFB1
GO:0033554	cellular response to stress	15	0.0289	ENSP00000167588,ENSP00000242261,ENSP00000257290,ENSP00000258080,ENSP00000275493,ENSP00000295834,ENSP00000316029,ENSP00000345347,ENSP00000351209,ENSP00000374265,ENSP00000376457,ENSP00000377536,ENSP00000411613,ENSP00000479618,ENSP00000484824	AOC1,ECT2,EGFR,EPHA2,FABP1,GPX2,HMGB1,HTRA2,KRT20,MUC1,MYC,PDGFRA,PTTG1,TLN1,TWIST1
GO:0001941	postsynaptic membrane organization	2	0.0292	ENSP00000304290,ENSP00000368169	CHRNB1,DVL1
GO:0021952	central nervous system projection neuron axonogenesis	2	0.0292	ENSP00000255448,ENSP00000454157	DCLK1,ZEB2
GO:0051043	regulation of membrane protein ectodomain proteolysis	2	0.0292	ENSP00000218388,ENSP00000284981	APP,TIMP1
GO:0060512	prostate gland morphogenesis	2	0.0292	ENSP00000245451,ENSP00000372221	BMP4,SERPINB5
GO:0071260	cellular response to mechanical stimulus	3	0.0292	ENSP00000221930,ENSP00000275493,ENSP00000283147	BMP6,EGFR,TGFB1
GO:2000679	positive regulation of transcription regulatory region DNA binding	2	0.0292	ENSP00000221930,ENSP00000242261	TGFB1,TWIST1
GO:2000816	negative regulation of mitotic sister chromatid separation	2	0.0292	ENSP00000301633,ENSP00000377536	BIRC5,PTTG1
GO:1901990	regulation of mitotic cell cycle phase transition	6	0.03	ENSP00000221930,ENSP00000275493,ENSP00000284981,ENSP00000301633,ENSP00000348838,ENSP00000484824	APP,BIRC5,EGFR,MUC1,TGFB1,UBE2C
GO:0001568	blood vessel development	7	0.0301	ENSP00000221930,ENSP00000245451,ENSP00000249749,ENSP00000257290,ENSP00000301945,ENSP00000351209,ENSP00000386170	ANTXR1,BMP4,DLL4,EPHA2,PDGFRA,TBX20,TGFB1
GO:0002244	hematopoietic progenitor cell differentiation	3	0.0308	ENSP00000221930,ENSP00000245451,ENSP00000257290	BMP4,PDGFRA,TGFB1
GO:0003171	atrioventricular valve development	2	0.0308	ENSP00000242261,ENSP00000386170	TBX20,TWIST1
GO:0007190	activation of adenylate cyclase activity	2	0.0308	ENSP00000229922,ENSP00000358730	ADORA3,CAP2
GO:0035235	ionotropic glutamate receptor signaling pathway	2	0.0308	ENSP00000284981,ENSP00000286827	APP,TIAM1
GO:0042058	regulation of epidermal growth factor receptor signaling pathway	3	0.0308	ENSP00000275493,ENSP00000284981,ENSP00000391490	AGR2,APP,EGFR
GO:0071466	cellular response to xenobiotic stimulus	4	0.0308	ENSP00000221930,ENSP00000275493,ENSP00000346768,ENSP00000411613	AOC1,EGFR,TGFB1,UGT1A9
GO:2000778	positive regulation of interleukin-6 secretion	2	0.0308	ENSP00000242261,ENSP00000345347	HMGB1,TWIST1
GO:0007369	gastrulation	4	0.0311	ENSP00000245451,ENSP00000296181,ENSP00000368169,ENSP00000386170	BMP4,DVL1,ITGB5,TBX20
GO:1905897	regulation of response to endoplasmic reticulum stress	3	0.0313	ENSP00000284981,ENSP00000315130,ENSP00000391490	AGR2,APP,CLU
GO:0002694	regulation of leukocyte activation	7	0.0314	ENSP00000221930,ENSP00000245451,ENSP00000264094,ENSP00000269571,ENSP00000284981,ENSP00000345347,ENSP00000355361	APP,BMP4,CD47,ERBB2,HMGB1,LOXL3,TGFB1
GO:0045927	positive regulation of growth	5	0.0315	ENSP00000248444,ENSP00000269571,ENSP00000275493,ENSP00000386170,ENSP00000391490	AGR2,EGFR,ERBB2,TBX20,VIL1
GO:0042481	regulation of odontogenesis	2	0.0323	ENSP00000221930,ENSP00000245451	BMP4,TGFB1
GO:0045664	regulation of neuron differentiation	8	0.0323	ENSP00000245451,ENSP00000283147,ENSP00000284981,ENSP00000286827,ENSP00000368169,ENSP00000376457,ENSP00000446007,ENSP00000454157	APP,BMP4,BMP6,DVL1,ECT2,TIAM1,VIM,ZEB2
GO:0060706	cell differentiation involved in embryonic placenta development	2	0.0323	ENSP00000355124,ENSP00000449404	KRT19,KRT8
GO:2000463	positive regulation of excitatory postsynaptic potential	2	0.0323	ENSP00000284981,ENSP00000368169	APP,DVL1
GO:0007568	aging	5	0.0326	ENSP00000218388,ENSP00000221930,ENSP00000258080,ENSP00000284981,ENSP00000446121	APP,HTRA2,LIMS1,TGFB1,TIMP1
GO:0043255	regulation of carbohydrate biosynthetic process	3	0.0327	ENSP00000221930,ENSP00000329137,ENSP00000375892	AKT2,FAM132A,TGFB1
GO:0071248	cellular response to metal ion	4	0.033	ENSP00000275493,ENSP00000283147,ENSP00000376457,ENSP00000411613	AOC1,BMP6,ECT2,EGFR
GO:0007229	integrin-mediated signaling pathway	3	0.0336	ENSP00000296181,ENSP00000316029,ENSP00000355361	CD47,ITGB5,TLN1
GO:0120035	regulation of plasma membrane bounded cell projection organization	8	0.0336	ENSP00000248444,ENSP00000284981,ENSP00000286827,ENSP00000351209,ENSP00000368169,ENSP00000398632,ENSP00000446007,ENSP00000454157	APP,CD44,DVL1,EPHA2,TIAM1,VIL1,VIM,ZEB2
GO:2001022	positive regulation of response to DNA damage stimulus	3	0.0336	ENSP00000275493,ENSP00000345347,ENSP00000479618	EGFR,HMGB1,MYC
GO:0003148	outflow tract septum morphogenesis	2	0.0339	ENSP00000245451,ENSP00000386170	BMP4,TBX20
GO:0045662	negative regulation of myoblast differentiation	2	0.0339	ENSP00000221930,ENSP00000245451	BMP4,TGFB1
GO:0034504	protein localization to nucleus	4	0.034	ENSP00000221930,ENSP00000245451,ENSP00000341483,ENSP00000368169	BMP4,DVL1,RANBP3,TGFB1
GO:0031349	positive regulation of defense response	6	0.0341	ENSP00000275493,ENSP00000284981,ENSP00000345347,ENSP00000355361,ENSP00000484824,ENSP00000485028	APP,CD47,EGFR,HMGB1,MUC1,MUC13
GO:0030900	forebrain development	6	0.0344	ENSP00000245451,ENSP00000255448,ENSP00000258080,ENSP00000275493,ENSP00000284981,ENSP00000454157	APP,BMP4,DCLK1,EGFR,HTRA2,ZEB2
GO:0044087	regulation of cellular component biogenesis	10	0.0344	ENSP00000221930,ENSP00000242261,ENSP00000248444,ENSP00000301945,ENSP00000315130,ENSP00000317272,ENSP00000345347,ENSP00000351209,ENSP00000386170,ENSP00000446121	ANTXR1,CLU,EPHA2,HMGB1,LIMS1,MET,TBX20,TGFB1,TWIST1,VIL1
GO:0050878	regulation of body fluid levels	7	0.0349	ENSP00000257290,ENSP00000293599,ENSP00000317272,ENSP00000361850,ENSP00000371958,ENSP00000377003,ENSP00000391490	AGR2,AQP5,CD9,MET,PDGFRA,PLAU,TSPAN8
GO:0046883	regulation of hormone secretion	5	0.035	ENSP00000275493,ENSP00000283147,ENSP00000286827,ENSP00000329137,ENSP00000351632	BMP6,EGFR,FAM132A,FAM3D,TIAM1
GO:0001892	embryonic placenta development	3	0.0351	ENSP00000275493,ENSP00000355124,ENSP00000449404	EGFR,KRT19,KRT8
GO:0003158	endothelium development	3	0.0351	ENSP00000245451,ENSP00000249749,ENSP00000317272	BMP4,DLL4,MET
GO:0009410	response to xenobiotic stimulus	5	0.0354	ENSP00000221930,ENSP00000275493,ENSP00000286827,ENSP00000346768,ENSP00000411613	AOC1,EGFR,TGFB1,TIAM1,UGT1A9
GO:0043312	neutrophil degranulation	7	0.0354	ENSP00000211998,ENSP00000219022,ENSP00000345347,ENSP00000355361,ENSP00000361850,ENSP00000398632,ENSP00000411613	AOC1,CD44,CD47,HMGB1,OLFM4,PLAU,VCL
GO:0071417	cellular response to organonitrogen compound	7	0.0354	ENSP00000221930,ENSP00000257290,ENSP00000275493,ENSP00000284981,ENSP00000345873,ENSP00000375892,ENSP00000411613	AKT2,AOC1,APP,EGFR,PDGFRA,SLC26A3,TGFB1
GO:0007435	salivary gland morphogenesis	2	0.0355	ENSP00000221930,ENSP00000275493	EGFR,TGFB1
GO:0035066	positive regulation of histone acetylation	2	0.0355	ENSP00000221930,ENSP00000484824	MUC1,TGFB1
GO:0035116	embryonic hindlimb morphogenesis	2	0.0355	ENSP00000242261,ENSP00000245451	BMP4,TWIST1
GO:0071549	cellular response to dexamethasone stimulus	2	0.0355	ENSP00000221930,ENSP00000275493	EGFR,TGFB1
GO:0009953	dorsal/ventral pattern formation	3	0.0357	ENSP00000245451,ENSP00000249749,ENSP00000386170	BMP4,DLL4,TBX20
GO:0033273	response to vitamin	3	0.0357	ENSP00000221930,ENSP00000263321,ENSP00000275493	EGFR,TGFB1,TYR
GO:0060021	roof of mouth development	3	0.0357	ENSP00000242261,ENSP00000257290,ENSP00000264094	LOXL3,PDGFRA,TWIST1
GO:0021953	central nervous system neuron differentiation	4	0.0365	ENSP00000249749,ENSP00000255448,ENSP00000386170,ENSP00000454157	DCLK1,DLL4,TBX20,ZEB2
GO:0045935	positive regulation of nucleobase-containing compound metabolic process	16	0.0366	ENSP00000221930,ENSP00000242261,ENSP00000245451,ENSP00000263735,ENSP00000269571,ENSP00000275493,ENSP00000283147,ENSP00000284981,ENSP00000317272,ENSP00000345347,ENSP00000349493,ENSP00000368169,ENSP00000386170,ENSP00000454157,ENSP00000479618,ENSP00000484824	APP,BMP4,BMP6,DVL1,EGFR,EPCAM,ERBB2,GUCA2A,HMGB1,MET,MUC1,MYC,TBX20,TGFB1,TWIST1,ZEB2
GO:0001938	positive regulation of endothelial cell proliferation	3	0.0372	ENSP00000245451,ENSP00000283147,ENSP00000345347	BMP4,BMP6,HMGB1
GO:0010453	regulation of cell fate commitment	2	0.0372	ENSP00000245451,ENSP00000264094	BMP4,LOXL3
GO:0030216	keratinocyte differentiation	5	0.0372	ENSP00000167588,ENSP00000331678,ENSP00000351209,ENSP00000355124,ENSP00000449404	EPHA2,KRT19,KRT20,KRT8,PKP3
GO:0050892	intestinal absorption	2	0.0372	ENSP00000248444,ENSP00000295834	FABP1,VIL1
GO:0060428	lung epithelium development	2	0.0372	ENSP00000245451,ENSP00000391490	AGR2,BMP4
GO:0002263	cell activation involved in immune response	8	0.0382	ENSP00000211998,ENSP00000219022,ENSP00000284981,ENSP00000345347,ENSP00000355361,ENSP00000361850,ENSP00000398632,ENSP00000411613	AOC1,APP,CD44,CD47,HMGB1,OLFM4,PLAU,VCL
GO:0016358	dendrite development	3	0.0382	ENSP00000255448,ENSP00000284981,ENSP00000368169	APP,DCLK1,DVL1
GO:0032092	positive regulation of protein binding	3	0.0382	ENSP00000245451,ENSP00000284981,ENSP00000286827	APP,BMP4,TIAM1
GO:0001569	branching involved in blood vessel morphogenesis	2	0.0389	ENSP00000249749,ENSP00000386170	DLL4,TBX20
GO:0010800	positive regulation of peptidyl-threonine phosphorylation	2	0.0389	ENSP00000221930,ENSP00000284981	APP,TGFB1
GO:0030866	cortical actin cytoskeleton organization	2	0.0389	ENSP00000248444,ENSP00000316029	TLN1,VIL1
GO:0033280	response to vitamin D	2	0.0389	ENSP00000221930,ENSP00000263321	TGFB1,TYR
GO:0048514	blood vessel morphogenesis	6	0.0389	ENSP00000221930,ENSP00000245451,ENSP00000249749,ENSP00000257290,ENSP00000351209,ENSP00000386170	BMP4,DLL4,EPHA2,PDGFRA,TBX20,TGFB1
GO:0061036	positive regulation of cartilage development	2	0.0389	ENSP00000245451,ENSP00000283147	BMP4,BMP6
GO:0090314	positive regulation of protein targeting to membrane	2	0.0389	ENSP00000269571,ENSP00000375892	AKT2,ERBB2
GO:1900181	negative regulation of protein localization to nucleus	2	0.0389	ENSP00000255448,ENSP00000284981	APP,DCLK1
GO:0010948	negative regulation of cell cycle process	5	0.0395	ENSP00000245451,ENSP00000301633,ENSP00000365851,ENSP00000377536,ENSP00000484824	BIRC5,BMI1,BMP4,MUC1,PTTG1
GO:0030509	BMP signaling pathway	3	0.0396	ENSP00000221930,ENSP00000245451,ENSP00000283147	BMP4,BMP6,TGFB1
GO:0046718	viral entry into host cell	3	0.0396	ENSP00000275493,ENSP00000296181,ENSP00000351209	EGFR,EPHA2,ITGB5
GO:0009895	negative regulation of catabolic process	5	0.0398	ENSP00000218388,ENSP00000258080,ENSP00000275493,ENSP00000317272,ENSP00000331678	EGFR,HTRA2,MET,PKP3,TIMP1
GO:1901701	cellular response to oxygen-containing compound	10	0.0398	ENSP00000221930,ENSP00000257290,ENSP00000258080,ENSP00000275493,ENSP00000284981,ENSP00000295834,ENSP00000345873,ENSP00000375892,ENSP00000376457,ENSP00000411613	AKT2,AOC1,APP,ECT2,EGFR,FABP1,HTRA2,PDGFRA,SLC26A3,TGFB1
GO:0003209	cardiac atrium morphogenesis	2	0.0402	ENSP00000249749,ENSP00000386170	DLL4,TBX20
GO:0016101	diterpenoid metabolic process	3	0.0402	ENSP00000275493,ENSP00000297785,ENSP00000346768	ALDH1A1,EGFR,UGT1A9
GO:0034766	negative regulation of ion transmembrane transport	3	0.0402	ENSP00000221930,ENSP00000242261,ENSP00000375892	AKT2,TGFB1,TWIST1
GO:0035282	segmentation	3	0.0402	ENSP00000245451,ENSP00000365851,ENSP00000454157	BMI1,BMP4,ZEB2
GO:0048839	inner ear development	4	0.0402	ENSP00000221930,ENSP00000245451,ENSP00000266674,ENSP00000368169	BMP4,DVL1,LGR5,TGFB1
GO:0055080	cation homeostasis	8	0.0402	ENSP00000221930,ENSP00000257290,ENSP00000275493,ENSP00000283147,ENSP00000284981,ENSP00000345347,ENSP00000345873,ENSP00000479618	APP,BMP6,EGFR,HMGB1,MYC,PDGFRA,SLC26A3,TGFB1
GO:0060325	face morphogenesis	2	0.0402	ENSP00000221930,ENSP00000257290	PDGFRA,TGFB1
GO:0062014	negative regulation of small molecule metabolic process	3	0.0402	ENSP00000221930,ENSP00000329137,ENSP00000346768	FAM132A,TGFB1,UGT1A9
GO:0071407	cellular response to organic cyclic compound	7	0.0402	ENSP00000221930,ENSP00000244930,ENSP00000245451,ENSP00000275493,ENSP00000284981,ENSP00000345873,ENSP00000411613	AOC1,APP,BMP4,EGFR,SCGB2A1,SLC26A3,TGFB1
GO:0097191	extrinsic apoptotic signaling pathway	3	0.0402	ENSP00000221930,ENSP00000267101,ENSP00000449404	ERBB3,KRT8,TGFB1
GO:1900078	positive regulation of cellular response to insulin stimulus	2	0.0402	ENSP00000329137,ENSP00000375892	AKT2,FAM132A
GO:0002443	leukocyte mediated immunity	8	0.0405	ENSP00000211998,ENSP00000219022,ENSP00000315130,ENSP00000345347,ENSP00000355361,ENSP00000361850,ENSP00000398632,ENSP00000411613	AOC1,CD44,CD47,CLU,HMGB1,OLFM4,PLAU,VCL
GO:0007276	gamete generation	8	0.0405	ENSP00000221930,ENSP00000245451,ENSP00000264670,ENSP00000266674,ENSP00000332576,ENSP00000345873,ENSP00000377003,ENSP00000377536	BMP4,LGR5,NSUN2,OSBP2,PTTG1,SLC26A3,TGFB1,TSPAN8
GO:0090263	positive regulation of canonical Wnt signaling pathway	3	0.0407	ENSP00000266674,ENSP00000275493,ENSP00000368169	DVL1,EGFR,LGR5
GO:0003203	endocardial cushion morphogenesis	2	0.0417	ENSP00000242261,ENSP00000386170	TBX20,TWIST1
GO:0048562	embryonic organ morphogenesis	5	0.0417	ENSP00000242261,ENSP00000245451,ENSP00000257290,ENSP00000368169,ENSP00000386170	BMP4,DVL1,PDGFRA,TBX20,TWIST1
GO:0050731	positive regulation of peptidyl-tyrosine phosphorylation	4	0.0417	ENSP00000221930,ENSP00000267101,ENSP00000284981,ENSP00000398632	APP,CD44,ERBB3,TGFB1
GO:0051150	regulation of smooth muscle cell differentiation	2	0.0417	ENSP00000221930,ENSP00000245451	BMP4,TGFB1
GO:0072210	metanephric nephron development	2	0.0417	ENSP00000245451,ENSP00000257290	BMP4,PDGFRA
GO:1900026	positive regulation of substrate adhesion-dependent cell spreading	2	0.0417	ENSP00000219022,ENSP00000446121	LIMS1,OLFM4
GO:1902905	positive regulation of supramolecular fiber organization	4	0.0417	ENSP00000248444,ENSP00000284981,ENSP00000315130,ENSP00000317272	APP,CLU,MET,VIL1
GO:1905332	positive regulation of morphogenesis of an epithelium	2	0.0417	ENSP00000221930,ENSP00000245451	BMP4,TGFB1
GO:0051153	regulation of striated muscle cell differentiation	3	0.0423	ENSP00000221930,ENSP00000221992,ENSP00000245451	BMP4,CEACAM5,TGFB1
GO:0014037	Schwann cell differentiation	2	0.0434	ENSP00000267101,ENSP00000375892	AKT2,ERBB3
GO:0014065	phosphatidylinositol 3-kinase signaling	2	0.0434	ENSP00000267101,ENSP00000269571	ERBB2,ERBB3
GO:0072009	nephron epithelium development	3	0.0434	ENSP00000245451,ENSP00000426809,ENSP00000479618	BMP4,MYC,PROM1
GO:0098771	inorganic ion homeostasis	8	0.0435	ENSP00000221930,ENSP00000257290,ENSP00000275493,ENSP00000283147,ENSP00000284981,ENSP00000345347,ENSP00000345873,ENSP00000479618	APP,BMP6,EGFR,HMGB1,MYC,PDGFRA,SLC26A3,TGFB1
GO:0051234	establishment of localization	30	0.0443	ENSP00000211998,ENSP00000218388,ENSP00000219022,ENSP00000221930,ENSP00000248444,ENSP00000255448,ENSP00000264094,ENSP00000275493,ENSP00000284981,ENSP00000293599,ENSP00000295834,ENSP00000301633,ENSP00000304290,ENSP00000315130,ENSP00000316029,ENSP00000332576,ENSP00000341483,ENSP00000345347,ENSP00000345873,ENSP00000355361,ENSP00000361850,ENSP00000368169,ENSP00000371958,ENSP00000375892,ENSP00000376457…	AGR2,AKT2,AOC1,APP,AQP5,BIRC5,CD44,CD47,CD9,CHRNB1,CLU,DCLK1,DVL1,ECT2,EGFR,FABP1,HMGB1,LIMS1,LOXL3,MYC,OLFM4,OSBP2,PLAU,RANBP3,SLC26A3,TGFB1,TIMP1,TLN1,VCL,VIL1
GO:0051591	response to cAMP	3	0.0443	ENSP00000263321,ENSP00000284981,ENSP00000345873	APP,SLC26A3,TYR
GO:0046916	cellular transition metal ion homeostasis	3	0.0452	ENSP00000283147,ENSP00000284981,ENSP00000479618	APP,BMP6,MYC
GO:0097421	liver regeneration	2	0.0452	ENSP00000221930,ENSP00000275493	EGFR,TGFB1
GO:0001666	response to hypoxia	5	0.0456	ENSP00000221930,ENSP00000242261,ENSP00000295834,ENSP00000361850,ENSP00000479618	FABP1,MYC,PLAU,TGFB1,TWIST1
GO:0046486	glycerolipid metabolic process	6	0.0457	ENSP00000257290,ENSP00000267101,ENSP00000269571,ENSP00000275493,ENSP00000295834,ENSP00000317272	EGFR,ERBB2,ERBB3,FABP1,MET,PDGFRA
GO:0010906	regulation of glucose metabolic process	3	0.0461	ENSP00000329137,ENSP00000345347,ENSP00000375892	AKT2,FAM132A,HMGB1
GO:0009416	response to light stimulus	5	0.0467	ENSP00000263321,ENSP00000275493,ENSP00000284981,ENSP00000375892,ENSP00000479618	AKT2,APP,EGFR,MYC,TYR
GO:0001755	neural crest cell migration	2	0.0472	ENSP00000242261,ENSP00000454157	TWIST1,ZEB2
GO:0006282	regulation of DNA repair	3	0.0472	ENSP00000242261,ENSP00000275493,ENSP00000345347	EGFR,HMGB1,TWIST1
GO:0031145	anaphase-promoting complex-dependent catabolic process	2	0.0472	ENSP00000348838,ENSP00000377536	PTTG1,UBE2C
GO:0043491	protein kinase B signaling	2	0.0472	ENSP00000221930,ENSP00000351209	EPHA2,TGFB1
GO:0050808	synapse organization	4	0.0472	ENSP00000269571,ENSP00000284981,ENSP00000304290,ENSP00000368169	APP,CHRNB1,DVL1,ERBB2
GO:1902893	regulation of pri-miRNA transcription by RNA polymerase II	2	0.0472	ENSP00000221930,ENSP00000245451	BMP4,TGFB1
GO:2000249	regulation of actin cytoskeleton reorganization	2	0.0472	ENSP00000221930,ENSP00000257290	PDGFRA,TGFB1
GO:0009987	cellular process	79	0.0489	ENSP00000167588,ENSP00000211998,ENSP00000218388,ENSP00000219022,ENSP00000221930,ENSP00000221992,ENSP00000229922,ENSP00000242261,ENSP00000244930,ENSP00000245451,ENSP00000248444,ENSP00000249749,ENSP00000255448,ENSP00000257290,ENSP00000258080,ENSP00000260302,ENSP00000263321,ENSP00000263735,ENSP00000264094,ENSP00000264670,ENSP00000266674,ENSP00000267101,ENSP00000269571,ENSP00000275493,ENSP00000283147…	ADORA3,AGR2,AKT2,ALDH1A1,ANTXR1,AOC1,APP,BIRC5,BMI1,BMP4,BMP6,CAP2,CD44,CD47,CD9,CEACAM5,CHRNB1,CHST14,CLU,DCLK1,DLL4,DVL1,ECT2,EGFR,ELAVL4,EPCAM,EPHA2,ERBB2,ERBB3,FABP1,GALNT12,GPA33,GPX2,HMGB1,HTRA2,ITGB5,KLK3,KRT19,KRT20,KRT8,LGR5,LIMS1,LOXL3,MET,MMP13,MUC1,MUC13,MYC,NSUN2,OLFM4,OSBP2,PDGFRA,PKP3,PLAU,PLS3,PROM1,PSAT1,PSG2,PTTG1,RANBP3,RSU1,SCGB2A1,SERPINB5,SLC26A3,TBX20,TGFB1,TIAM1,TIMP1,TK1,…
GO:0010464	regulation of mesenchymal cell proliferation	2	0.049	ENSP00000245451,ENSP00000479618	BMP4,MYC
GO:0021510	spinal cord development	3	0.049	ENSP00000249749,ENSP00000264094,ENSP00000386170	DLL4,LOXL3,TBX20
GO:0032885	regulation of polysaccharide biosynthetic process	2	0.049	ENSP00000221930,ENSP00000375892	AKT2,TGFB1
GO:0035051	cardiocyte differentiation	3	0.049	ENSP00000242261,ENSP00000245451,ENSP00000257290	BMP4,PDGFRA,TWIST1
GO:0035924	cellular response to vascular endothelial growth factor stimulus	2	0.049	ENSP00000249749,ENSP00000257290	DLL4,PDGFRA
GO:0051443	positive regulation of ubiquitin-protein transferase activity	2	0.049	ENSP00000348838,ENSP00000365851	BMI1,UBE2C
GO:0106027	neuron projection organization	2	0.049	ENSP00000284981,ENSP00000368169	APP,DVL1
GO:0000075	cell cycle checkpoint	4	0.0496	ENSP00000221930,ENSP00000264670,ENSP00000301633,ENSP00000484824	BIRC5,MUC1,NSUN2,TGFB1
GO:0001525	angiogenesis	5	0.0497	ENSP00000245451,ENSP00000249749,ENSP00000257290,ENSP00000351209,ENSP00000386170	BMP4,DLL4,EPHA2,PDGFRA,TBX20
GO:0006952	defense response	12	0.0497	ENSP00000218388,ENSP00000221930,ENSP00000264094,ENSP00000275493,ENSP00000283147,ENSP00000284981,ENSP00000314151,ENSP00000315130,ENSP00000345347,ENSP00000358730,ENSP00000398632,ENSP00000446007	ADORA3,APP,BMP6,CD44,CLU,EGFR,HMGB1,KLK3,LOXL3,TGFB1,TIMP1,VIM
GO:0016192	vesicle-mediated transport	15	0.0497	ENSP00000211998,ENSP00000218388,ENSP00000219022,ENSP00000221930,ENSP00000255448,ENSP00000264094,ENSP00000284981,ENSP00000315130,ENSP00000316029,ENSP00000345347,ENSP00000355361,ENSP00000361850,ENSP00000371958,ENSP00000398632,ENSP00000411613	AOC1,APP,CD44,CD47,CD9,CLU,DCLK1,HMGB1,LOXL3,OLFM4,PLAU,TGFB1,TIMP1,TLN1,VCL

## Sheet: Exosome KEGG
#pathway ID	pathway description	observed gene count	false discovery rate	matching proteins in your network (IDs)	matching proteins in your network (labels)
hsa04722	Neurotrophin signaling pathway	4	0.0091	ENSP00000263826,ENSP00000300574,ENSP00000367545,ENSP00000376345	AKT3,CRK,GRB2,TP73
hsa05160	Hepatitis C	4	0.0091	ENSP00000261693,ENSP00000263645,ENSP00000263826,ENSP00000376345	AKT3,CD81,GRB2,SCARB1
hsa05205	Proteoglycans in cancer	5	0.0091	ENSP00000263826,ENSP00000264039,ENSP00000344456,ENSP00000376345,ENSP00000447730	AKT3,CD63,CTNNB1,GPC1,GRB2
hsa05213	Endometrial cancer	3	0.0104	ENSP00000263826,ENSP00000344456,ENSP00000376345	AKT3,CTNNB1,GRB2
hsa04012	ErbB signaling pathway	3	0.013	ENSP00000263826,ENSP00000300574,ENSP00000376345	AKT3,CRK,GRB2
hsa04015	Rap1 signaling pathway	4	0.013	ENSP00000263826,ENSP00000300574,ENSP00000344456,ENSP00000351209	AKT3,CRK,CTNNB1,EPHA2
hsa04360	Axon guidance	4	0.013	ENSP00000204961,ENSP00000245323,ENSP00000351209,ENSP00000381097	EFNB1,EFNB2,EPHA2,EPHB1
hsa04510	Focal adhesion	4	0.013	ENSP00000263826,ENSP00000300574,ENSP00000344456,ENSP00000376345	AKT3,CRK,CTNNB1,GRB2
hsa04662	B cell receptor signaling pathway	3	0.013	ENSP00000263645,ENSP00000263826,ENSP00000376345	AKT3,CD81,GRB2
hsa05210	Colorectal cancer	3	0.013	ENSP00000263826,ENSP00000344456,ENSP00000376345	AKT3,CTNNB1,GRB2
hsa05211	Renal cell carcinoma	3	0.013	ENSP00000263826,ENSP00000300574,ENSP00000376345	AKT3,CRK,GRB2
hsa05220	Chronic myeloid leukemia	3	0.013	ENSP00000263826,ENSP00000300574,ENSP00000376345	AKT3,CRK,GRB2
hsa05215	Prostate cancer	3	0.0136	ENSP00000263826,ENSP00000344456,ENSP00000376345	AKT3,CTNNB1,GRB2
hsa04144	Endocytosis	4	0.0183	ENSP00000251968,ENSP00000253794,ENSP00000297265,ENSP00000411825	CHMP4C,PDCD6IP,TSG101,VPS25
hsa04010	MAPK signaling pathway	4	0.0283	ENSP00000263826,ENSP00000300574,ENSP00000351209,ENSP00000376345	AKT3,CRK,EPHA2,GRB2
hsa04550	Signaling pathways regulating pluripotency of stem cells	3	0.0283	ENSP00000263826,ENSP00000344456,ENSP00000376345	AKT3,CTNNB1,GRB2
hsa04910	Insulin signaling pathway	3	0.0283	ENSP00000263826,ENSP00000300574,ENSP00000376345	AKT3,CRK,GRB2
hsa05034	Alcoholism	3	0.0283	ENSP00000355778,ENSP00000376345,ENSP00000475814	GRB2,H3F3A,HIST2H2AA3
hsa05224	Breast cancer	3	0.0283	ENSP00000263826,ENSP00000344456,ENSP00000376345	AKT3,CTNNB1,GRB2
hsa05226	Gastric cancer	3	0.0283	ENSP00000263826,ENSP00000344456,ENSP00000376345	AKT3,CTNNB1,GRB2
hsa05418	Fluid shear stress and atherosclerosis	3	0.0283	ENSP00000263826,ENSP00000264039,ENSP00000344456	AKT3,CTNNB1,GPC1
hsa05165	Human papillomavirus infection	4	0.0303	ENSP00000263826,ENSP00000344456,ENSP00000375942,ENSP00000376345	AKT3,CTNNB1,GRB2,TBP
hsa05225	Hepatocellular carcinoma	3	0.0322	ENSP00000263826,ENSP00000344456,ENSP00000376345	AKT3,CTNNB1,GRB2
hsa04062	Chemokine signaling pathway	3	0.041	ENSP00000263826,ENSP00000300574,ENSP00000376345	AKT3,CRK,GRB2

## Sheet: Exosome reactom
#pathway ID	pathway description	observed gene count	false discovery rate	matching proteins in your network (IDs)	matching proteins in your network (labels)
HSA-5663205	Infectious disease	10	2.77e-06	ENSP00000251968,ENSP00000297265,ENSP00000314214,ENSP00000344456,ENSP00000371958,ENSP00000375730,ENSP00000375942,ENSP00000411825,ENSP00000441543,ENSP00000452780	B2M,CD9,CHMP4C,CTNNB1,PDCD6IP,RPL13A,TBP,TSG101,UBC,VAMP2
HSA-162588	Budding and maturation of HIV virion	4	0.00018	ENSP00000251968,ENSP00000297265,ENSP00000411825,ENSP00000441543	CHMP4C,PDCD6IP,TSG101,UBC
HSA-1643685	Disease	12	0.00018	ENSP00000251968,ENSP00000263826,ENSP00000264039,ENSP00000297265,ENSP00000314214,ENSP00000344456,ENSP00000371958,ENSP00000375730,ENSP00000375942,ENSP00000411825,ENSP00000441543,ENSP00000452780	AKT3,B2M,CD9,CHMP4C,CTNNB1,GPC1,PDCD6IP,RPL13A,TBP,TSG101,UBC,VAMP2
HSA-917729	Endosomal Sorting Complex Required For Transport (ESCRT)	4	0.00018	ENSP00000251968,ENSP00000253794,ENSP00000297265,ENSP00000441543	CHMP4C,TSG101,UBC,VPS25
HSA-3928665	EPH-ephrin mediated repulsion of cells	4	0.00063	ENSP00000204961,ENSP00000245323,ENSP00000351209,ENSP00000381097	EFNB1,EFNB2,EPHA2,EPHB1
HSA-1266738	Developmental Biology	11	0.00077	ENSP00000204961,ENSP00000245323,ENSP00000263826,ENSP00000264039,ENSP00000344456,ENSP00000351209,ENSP00000355778,ENSP00000375730,ENSP00000381097,ENSP00000441543,ENSP00000475814	AKT3,CTNNB1,EFNB1,EFNB2,EPHA2,EPHB1,GPC1,H3F3A,HIST2H2AA3,RPL13A,UBC
HSA-162906	HIV Infection	6	0.00077	ENSP00000251968,ENSP00000297265,ENSP00000375942,ENSP00000411825,ENSP00000441543,ENSP00000452780	B2M,CHMP4C,PDCD6IP,TBP,TSG101,UBC
HSA-162599	Late Phase of HIV Life Cycle	5	0.00087	ENSP00000251968,ENSP00000297265,ENSP00000375942,ENSP00000411825,ENSP00000441543	CHMP4C,PDCD6IP,TBP,TSG101,UBC
HSA-3928664	Ephrin signaling	3	0.00087	ENSP00000204961,ENSP00000245323,ENSP00000381097	EFNB1,EFNB2,EPHB1
HSA-162587	HIV Life Cycle	5	0.0011	ENSP00000251968,ENSP00000297265,ENSP00000375942,ENSP00000411825,ENSP00000441543	CHMP4C,PDCD6IP,TBP,TSG101,UBC
HSA-5339562	Uptake and actions of bacterial toxins	3	0.0015	ENSP00000314214,ENSP00000371958,ENSP00000411825	CD9,PDCD6IP,VAMP2
HSA-977225	Amyloid fiber formation	4	0.0015	ENSP00000355778,ENSP00000441543,ENSP00000452780,ENSP00000475814	B2M,H3F3A,HIST2H2AA3,UBC
HSA-2559580	Oxidative Stress Induced Senescence	4	0.0023	ENSP00000355778,ENSP00000399511,ENSP00000441543,ENSP00000475814	H3F3A,HIST2H2AA3,TNIK,UBC
HSA-8939236	RUNX1 regulates transcription of genes involved in differentiation of HSCs	4	0.0023	ENSP00000355778,ENSP00000367545,ENSP00000441543,ENSP00000475814	H3F3A,HIST2H2AA3,TP73,UBC
HSA-8953897	Cellular responses to external stimuli	7	0.0023	ENSP00000297265,ENSP00000302961,ENSP00000355778,ENSP00000367623,ENSP00000399511,ENSP00000441543,ENSP00000475814	CHMP4C,H3F3A,HIST2H2AA3,HSPA14,HSPA4,TNIK,UBC
HSA-427359	SIRT1 negatively regulates rRNA expression	3	0.003	ENSP00000355778,ENSP00000375942,ENSP00000475814	H3F3A,HIST2H2AA3,TBP
HSA-3928662	EPHB-mediated forward signaling	3	0.0037	ENSP00000204961,ENSP00000245323,ENSP00000381097	EFNB1,EFNB2,EPHB1
HSA-422475	Axon guidance	7	0.0046	ENSP00000204961,ENSP00000245323,ENSP00000264039,ENSP00000351209,ENSP00000375730,ENSP00000381097,ENSP00000441543	EFNB1,EFNB2,EPHA2,EPHB1,GPC1,RPL13A,UBC
HSA-2262752	Cellular responses to stress	6	0.005	ENSP00000302961,ENSP00000355778,ENSP00000367623,ENSP00000399511,ENSP00000441543,ENSP00000475814	H3F3A,HIST2H2AA3,HSPA14,HSPA4,TNIK,UBC
HSA-8876493	InlA-mediated entry of Listeria monocytogenes into host cells	2	0.0068	ENSP00000344456,ENSP00000441543	CTNNB1,UBC
HSA-199991	Membrane Trafficking	7	0.0081	ENSP00000251968,ENSP00000253794,ENSP00000263826,ENSP00000297265,ENSP00000314214,ENSP00000357564,ENSP00000441543	AKT3,CHMP4C,RAB13,TSG101,UBC,VAMP2,VPS25
HSA-201722	Formation of the beta-catenin:TCF transactivating complex	3	0.0081	ENSP00000344456,ENSP00000355778,ENSP00000475814	CTNNB1,H3F3A,HIST2H2AA3
HSA-5250924	B-WICH complex positively regulates rRNA expression	3	0.0081	ENSP00000355778,ENSP00000375942,ENSP00000475814	H3F3A,HIST2H2AA3,TBP
HSA-73777	RNA Polymerase I Chain Elongation	3	0.0081	ENSP00000355778,ENSP00000375942,ENSP00000475814	H3F3A,HIST2H2AA3,TBP
HSA-109581	Apoptosis	4	0.0091	ENSP00000263826,ENSP00000344456,ENSP00000367545,ENSP00000441543	AKT3,CTNNB1,TP73,UBC
HSA-1358803	Downregulation of ERBB2:ERBB3 signaling	2	0.0091	ENSP00000263826,ENSP00000441543	AKT3,UBC
HSA-5357801	Programmed Cell Death	4	0.0091	ENSP00000263826,ENSP00000344456,ENSP00000367545,ENSP00000441543	AKT3,CTNNB1,TP73,UBC
HSA-5633007	Regulation of TP53 Activity	4	0.0091	ENSP00000263826,ENSP00000367545,ENSP00000375942,ENSP00000441543	AKT3,TBP,TP73,UBC
HSA-5653656	Vesicle-mediated transport	7	0.0091	ENSP00000251968,ENSP00000253794,ENSP00000263826,ENSP00000297265,ENSP00000314214,ENSP00000357564,ENSP00000441543	AKT3,CHMP4C,RAB13,TSG101,UBC,VAMP2,VPS25
HSA-174490	Membrane binding and targetting of GAG proteins	2	0.0097	ENSP00000251968,ENSP00000441543	TSG101,UBC
HSA-6804759	Regulation of TP53 Activity through Association with Co-factors	2	0.0097	ENSP00000263826,ENSP00000367545	AKT3,TP73
HSA-427413	NoRC negatively regulates rRNA expression	3	0.0098	ENSP00000355778,ENSP00000375942,ENSP00000475814	H3F3A,HIST2H2AA3,TBP
HSA-2559582	Senescence-Associated Secretory Phenotype (SASP)	3	0.0107	ENSP00000355778,ENSP00000441543,ENSP00000475814	H3F3A,HIST2H2AA3,UBC
HSA-73854	RNA Polymerase I Promoter Clearance	3	0.0107	ENSP00000355778,ENSP00000375942,ENSP00000475814	H3F3A,HIST2H2AA3,TBP
HSA-201681	TCF dependent signaling in response to WNT	4	0.0126	ENSP00000344456,ENSP00000355778,ENSP00000441543,ENSP00000475814	CTNNB1,H3F3A,HIST2H2AA3,UBC
HSA-6803204	TP53 Regulates Transcription of Genes Involved in Cytochrome C Release	2	0.0126	ENSP00000367545,ENSP00000376822	STEAP3,TP73
HSA-3700989	Transcriptional Regulation by TP53	5	0.0133	ENSP00000263826,ENSP00000367545,ENSP00000375942,ENSP00000376822,ENSP00000441543	AKT3,STEAP3,TBP,TP73,UBC
HSA-912631	Regulation of signaling by CBL	2	0.0138	ENSP00000300574,ENSP00000441543	CRK,UBC
HSA-4420097	VEGFA-VEGFR2 Pathway	3	0.0148	ENSP00000263826,ENSP00000300574,ENSP00000344456	AKT3,CRK,CTNNB1
HSA-194138	Signaling by VEGF	3	0.0187	ENSP00000263826,ENSP00000300574,ENSP00000344456	AKT3,CRK,CTNNB1
HSA-109582	Hemostasis	6	0.0205	ENSP00000263735,ENSP00000264039,ENSP00000300574,ENSP00000355778,ENSP00000371958,ENSP00000447730	CD63,CD9,CRK,EPCAM,GPC1,H3F3A
HSA-5218920	VEGFR2 mediated vascular permeability	2	0.0205	ENSP00000263826,ENSP00000344456	AKT3,CTNNB1
HSA-1474165	Reproduction	3	0.0207	ENSP00000355778,ENSP00000371958,ENSP00000475814	CD9,H3F3A,HIST2H2AA3
HSA-114452	Activation of BH3-only proteins	2	0.0218	ENSP00000263826,ENSP00000367545	AKT3,TP73
HSA-9018519	Estrogen-dependent gene expression	3	0.0232	ENSP00000355778,ENSP00000375942,ENSP00000475814	H3F3A,HIST2H2AA3,TBP
HSA-212436	Generic Transcription Pathway	8	0.0234	ENSP00000263826,ENSP00000344456,ENSP00000355778,ENSP00000367545,ENSP00000375942,ENSP00000376822,ENSP00000441543,ENSP00000475814	AKT3,CTNNB1,H3F3A,HIST2H2AA3,STEAP3,TBP,TP73,UBC
HSA-5689901	Metalloprotease DUBs	2	0.0234	ENSP00000441543,ENSP00000475814	HIST2H2AA3,UBC
HSA-73728	RNA Polymerase I Promoter Opening	2	0.024	ENSP00000355778,ENSP00000475814	H3F3A,HIST2H2AA3
HSA-5334118	DNA methylation	2	0.026	ENSP00000355778,ENSP00000475814	H3F3A,HIST2H2AA3
HSA-6804757	Regulation of TP53 Degradation	2	0.027	ENSP00000263826,ENSP00000441543	AKT3,UBC
HSA-5625886	Activated PKN1 stimulates transcription of AR (androgen receptor) regulated genes KLK2 and KLK3	2	0.028	ENSP00000355778,ENSP00000475814	H3F3A,HIST2H2AA3
HSA-195721	Signaling by WNT	4	0.0333	ENSP00000344456,ENSP00000355778,ENSP00000441543,ENSP00000475814	CTNNB1,H3F3A,HIST2H2AA3,UBC
HSA-3769402	Deactivation of the beta-catenin transactivating complex	2	0.0341	ENSP00000344456,ENSP00000441543	CTNNB1,UBC
HSA-109606	Intrinsic Pathway for Apoptosis	2	0.0352	ENSP00000263826,ENSP00000367545	AKT3,TP73
HSA-212300	PRC2 methylates histones and DNA	2	0.0352	ENSP00000355778,ENSP00000475814	H3F3A,HIST2H2AA3
HSA-2299718	Condensation of Prophase Chromosomes	2	0.0352	ENSP00000355778,ENSP00000475814	H3F3A,HIST2H2AA3
HSA-73857	RNA Polymerase II Transcription	8	0.0358	ENSP00000263826,ENSP00000344456,ENSP00000355778,ENSP00000367545,ENSP00000375942,ENSP00000376822,ENSP00000441543,ENSP00000475814	AKT3,CTNNB1,H3F3A,HIST2H2AA3,STEAP3,TBP,TP73,UBC
HSA-427389	ERCC6 (CSB) and EHMT2 (G9a) positively regulate rRNA expression	2	0.0373	ENSP00000355778,ENSP00000475814	H3F3A,HIST2H2AA3
HSA-168249	Innate Immune System	7	0.0431	ENSP00000263645,ENSP00000300574,ENSP00000344456,ENSP00000441543,ENSP00000447730,ENSP00000452780,ENSP00000477590	B2M,CD63,CD81,CPNE3,CRK,CTNNB1,UBC
HSA-8848021	Signaling by PTK6	2	0.0445	ENSP00000300574,ENSP00000441543	CRK,UBC
HSA-9006927	Signaling by Non-Receptor Tyrosine Kinases	2	0.0445	ENSP00000300574,ENSP00000441543	CRK,UBC
HSA-168256	Immune System	10	0.0493	ENSP00000263645,ENSP00000263826,ENSP00000300574,ENSP00000314214,ENSP00000344456,ENSP00000376345,ENSP00000441543,ENSP00000447730,ENSP00000452780,ENSP00000477590	AKT3,B2M,CD63,CD81,CPNE3,CRK,CTNNB1,GRB2,UBC,VAMP2
HSA-912446	Meiotic recombination	2	0.0493	ENSP00000355778,ENSP00000475814	H3F3A,HIST2H2AA3
HSA-917937	Iron uptake and transport	2	0.0499	ENSP00000376822,ENSP00000441543	STEAP3,UBC

## Sheet: Exosome cellular component
#pathway ID	pathway description	observed gene count	false discovery rate	matching proteins in your network (IDs)	matching proteins in your network (labels)
GO:0031982	vesicle	22	6.47e-08	ENSP00000251968,ENSP00000253794,ENSP00000261693,ENSP00000263645,ENSP00000264039,ENSP00000297265,ENSP00000302961,ENSP00000314214,ENSP00000354995,ENSP00000357564,ENSP00000364801,ENSP00000371958,ENSP00000376345,ENSP00000376822,ENSP00000381097,ENSP00000399511,ENSP00000411825,ENSP00000441543,ENSP00000447730,ENSP00000452780,ENSP00000477590,ENSP00000477781	ABCG1,B2M,CD63,CD81,CD9,CHMP4C,CPNE3,EPHB1,GPC1,GRB2,HSPA1B,HSPA4,PDCD6IP,RAB13,SCARB1,STEAP3,TNIK,TPT1,TSG101,UBC,VAMP2,VPS25
GO:0005768	endosome	14	3.55e-07	ENSP00000251968,ENSP00000253794,ENSP00000264039,ENSP00000297265,ENSP00000354995,ENSP00000357564,ENSP00000376345,ENSP00000376822,ENSP00000381097,ENSP00000399511,ENSP00000441543,ENSP00000447730,ENSP00000452780,ENSP00000477781	ABCG1,B2M,CD63,CHMP4C,EPHB1,GPC1,GRB2,RAB13,STEAP3,TNIK,TPT1,TSG101,UBC,VPS25
GO:0031410	cytoplasmic vesicle	20	6.01e-07	ENSP00000251968,ENSP00000253794,ENSP00000261693,ENSP00000264039,ENSP00000297265,ENSP00000314214,ENSP00000354995,ENSP00000357564,ENSP00000364801,ENSP00000371958,ENSP00000376345,ENSP00000376822,ENSP00000381097,ENSP00000399511,ENSP00000411825,ENSP00000441543,ENSP00000447730,ENSP00000452780,ENSP00000477590,ENSP00000477781	ABCG1,B2M,CD63,CD9,CHMP4C,CPNE3,EPHB1,GPC1,GRB2,HSPA1B,PDCD6IP,RAB13,SCARB1,STEAP3,TNIK,TPT1,TSG101,UBC,VAMP2,VPS25
GO:0098805	whole membrane	17	6.01e-07	ENSP00000204961,ENSP00000251968,ENSP00000253794,ENSP00000261693,ENSP00000264039,ENSP00000297265,ENSP00000300574,ENSP00000314214,ENSP00000344456,ENSP00000357564,ENSP00000371958,ENSP00000376822,ENSP00000381097,ENSP00000441543,ENSP00000447730,ENSP00000452780,ENSP00000477590	B2M,CD63,CD9,CHMP4C,CPNE3,CRK,CTNNB1,EFNB1,EPHB1,GPC1,RAB13,SCARB1,STEAP3,TSG101,UBC,VAMP2,VPS25
GO:0070062	extracellular exosome	6	1.42e-06	ENSP00000251968,ENSP00000263645,ENSP00000302961,ENSP00000371958,ENSP00000411825,ENSP00000447730	CD63,CD81,CD9,HSPA4,PDCD6IP,TSG101
GO:0044459	plasma membrane part	20	3.9e-06	ENSP00000006724,ENSP00000204961,ENSP00000245323,ENSP00000261693,ENSP00000263645,ENSP00000263735,ENSP00000264039,ENSP00000314214,ENSP00000344456,ENSP00000351209,ENSP00000354995,ENSP00000357564,ENSP00000371958,ENSP00000376345,ENSP00000376822,ENSP00000381097,ENSP00000399511,ENSP00000411825,ENSP00000447730,ENSP00000452780	ABCG1,B2M,CD63,CD81,CD9,CEACAM7,CTNNB1,EFNB1,EFNB2,EPCAM,EPHA2,EPHB1,GPC1,GRB2,PDCD6IP,RAB13,SCARB1,STEAP3,TNIK,VAMP2
GO:0010008	endosome membrane	9	1.54e-05	ENSP00000251968,ENSP00000253794,ENSP00000297265,ENSP00000357564,ENSP00000376822,ENSP00000381097,ENSP00000441543,ENSP00000447730,ENSP00000452780	B2M,CD63,CHMP4C,EPHB1,RAB13,STEAP3,TSG101,UBC,VPS25
GO:0044433	cytoplasmic vesicle part	14	2.96e-05	ENSP00000251968,ENSP00000253794,ENSP00000261693,ENSP00000297265,ENSP00000314214,ENSP00000357564,ENSP00000364801,ENSP00000371958,ENSP00000376822,ENSP00000381097,ENSP00000441543,ENSP00000447730,ENSP00000452780,ENSP00000477590	B2M,CD63,CD9,CHMP4C,CPNE3,EPHB1,HSPA1B,RAB13,SCARB1,STEAP3,TSG101,UBC,VAMP2,VPS25
GO:0005771	multivesicular body	4	5.02e-05	ENSP00000251968,ENSP00000376822,ENSP00000447730,ENSP00000477781	CD63,STEAP3,TPT1,TSG101
GO:0012505	endomembrane system	22	0.00043	ENSP00000251968,ENSP00000253794,ENSP00000264039,ENSP00000297265,ENSP00000314214,ENSP00000354995,ENSP00000357564,ENSP00000359380,ENSP00000364801,ENSP00000367545,ENSP00000371958,ENSP00000376345,ENSP00000376822,ENSP00000381097,ENSP00000399511,ENSP00000411825,ENSP00000441543,ENSP00000447730,ENSP00000452780,ENSP00000473093,ENSP00000477590,ENSP00000477781	ABCG1,B2M,CD63,CD9,CHMP4C,CPNE3,EPHB1,GPC1,GRB2,HSPA1B,MAGEA3,PDCD6IP,RAB13,SCD,STEAP3,TNIK,TP73,TPT1,TSG101,UBC,VAMP2,VPS25
GO:0005886	plasma membrane	24	0.0005	ENSP00000006724,ENSP00000204961,ENSP00000245323,ENSP00000251968,ENSP00000261693,ENSP00000263645,ENSP00000263735,ENSP00000264039,ENSP00000300574,ENSP00000314214,ENSP00000344456,ENSP00000351209,ENSP00000354995,ENSP00000357564,ENSP00000371958,ENSP00000376345,ENSP00000376822,ENSP00000381097,ENSP00000399511,ENSP00000411825,ENSP00000441543,ENSP00000447730,ENSP00000452780,ENSP00000477590	ABCG1,B2M,CD63,CD81,CD9,CEACAM7,CPNE3,CRK,CTNNB1,EFNB1,EFNB2,EPCAM,EPHA2,EPHB1,GPC1,GRB2,PDCD6IP,RAB13,SCARB1,STEAP3,TNIK,TSG101,UBC,VAMP2
GO:0012506	vesicle membrane	9	0.0005	ENSP00000261693,ENSP00000314214,ENSP00000357564,ENSP00000371958,ENSP00000376345,ENSP00000441543,ENSP00000447730,ENSP00000452780,ENSP00000477590	B2M,CD63,CD9,CPNE3,GRB2,RAB13,SCARB1,UBC,VAMP2
GO:0036452	ESCRT complex	3	0.00063	ENSP00000251968,ENSP00000253794,ENSP00000297265	CHMP4C,TSG101,VPS25
GO:0090543	Flemming body	3	0.00063	ENSP00000251968,ENSP00000297265,ENSP00000411825	CHMP4C,PDCD6IP,TSG101
GO:0098588	bounding membrane of organelle	14	0.00063	ENSP00000251968,ENSP00000253794,ENSP00000261693,ENSP00000297265,ENSP00000314214,ENSP00000354995,ENSP00000357564,ENSP00000371958,ENSP00000376822,ENSP00000381097,ENSP00000441543,ENSP00000447730,ENSP00000452780,ENSP00000477590	ABCG1,B2M,CD63,CD9,CHMP4C,CPNE3,EPHB1,RAB13,SCARB1,STEAP3,TSG101,UBC,VAMP2,VPS25
GO:0005829	cytosol	23	0.00066	ENSP00000251968,ENSP00000253794,ENSP00000264039,ENSP00000278715,ENSP00000297265,ENSP00000300574,ENSP00000302961,ENSP00000314214,ENSP00000331901,ENSP00000344456,ENSP00000357564,ENSP00000364801,ENSP00000367545,ENSP00000367623,ENSP00000375730,ENSP00000376345,ENSP00000381097,ENSP00000399511,ENSP00000411825,ENSP00000441543,ENSP00000452780,ENSP00000477590,ENSP00000477781	B2M,CHMP4C,CPNE3,CRK,CTNNB1,EEF1G,EPHB1,GPC1,GRB2,HMBS,HSPA14,HSPA1B,HSPA4,PDCD6IP,RAB13,RPL13A,TNIK,TP73,TPT1,TSG101,UBC,VAMP2,VPS25
GO:0045121	membrane raft	6	0.00066	ENSP00000204961,ENSP00000261693,ENSP00000264039,ENSP00000300574,ENSP00000344456,ENSP00000381097	CRK,CTNNB1,EFNB1,EPHB1,GPC1,SCARB1
GO:0031226	intrinsic component of plasma membrane	12	0.0015	ENSP00000204961,ENSP00000245323,ENSP00000261693,ENSP00000263645,ENSP00000263735,ENSP00000264039,ENSP00000314214,ENSP00000351209,ENSP00000371958,ENSP00000376822,ENSP00000381097,ENSP00000447730	CD63,CD81,CD9,EFNB1,EFNB2,EPCAM,EPHA2,EPHB1,GPC1,SCARB1,STEAP3,VAMP2
GO:0005770	late endosome	5	0.0017	ENSP00000251968,ENSP00000297265,ENSP00000376822,ENSP00000447730,ENSP00000477781	CD63,CHMP4C,STEAP3,TPT1,TSG101
GO:0005923	bicellular tight junction	4	0.0017	ENSP00000263735,ENSP00000344456,ENSP00000357564,ENSP00000411825	CTNNB1,EPCAM,PDCD6IP,RAB13
GO:0030659	cytoplasmic vesicle membrane	8	0.0017	ENSP00000261693,ENSP00000314214,ENSP00000357564,ENSP00000371958,ENSP00000441543,ENSP00000447730,ENSP00000452780,ENSP00000477590	B2M,CD63,CD9,CPNE3,RAB13,SCARB1,UBC,VAMP2
GO:0044425	membrane part	26	0.0017	ENSP00000006724,ENSP00000204961,ENSP00000245323,ENSP00000251968,ENSP00000253794,ENSP00000261693,ENSP00000263645,ENSP00000263735,ENSP00000264039,ENSP00000297265,ENSP00000300574,ENSP00000314214,ENSP00000344456,ENSP00000351209,ENSP00000354995,ENSP00000357564,ENSP00000359380,ENSP00000371958,ENSP00000376345,ENSP00000376822,ENSP00000381097,ENSP00000399511,ENSP00000411825,ENSP00000441543,ENSP00000447730…	ABCG1,B2M,CD63,CD81,CD9,CEACAM7,CHMP4C,CRK,CTNNB1,EFNB1,EFNB2,EPCAM,EPHA2,EPHB1,GPC1,GRB2,PDCD6IP,RAB13,SCARB1,SCD,STEAP3,TNIK,TSG101,UBC,VAMP2,VPS25
GO:0016328	lateral plasma membrane	3	0.0024	ENSP00000263735,ENSP00000344456,ENSP00000357564	CTNNB1,EPCAM,RAB13
GO:0030054	cell junction	9	0.0024	ENSP00000263735,ENSP00000314214,ENSP00000344456,ENSP00000351209,ENSP00000357564,ENSP00000367545,ENSP00000376345,ENSP00000411825,ENSP00000477590	CPNE3,CTNNB1,EPCAM,EPHA2,GRB2,PDCD6IP,RAB13,TP73,VAMP2
GO:0030139	endocytic vesicle	5	0.0029	ENSP00000261693,ENSP00000357564,ENSP00000371958,ENSP00000441543,ENSP00000452780	B2M,CD9,RAB13,SCARB1,UBC
GO:0030666	endocytic vesicle membrane	4	0.003	ENSP00000261693,ENSP00000371958,ENSP00000441543,ENSP00000452780	B2M,CD9,SCARB1,UBC
GO:0005887	integral component of plasma membrane	11	0.0031	ENSP00000204961,ENSP00000245323,ENSP00000261693,ENSP00000263645,ENSP00000263735,ENSP00000314214,ENSP00000351209,ENSP00000371958,ENSP00000376822,ENSP00000381097,ENSP00000447730	CD63,CD81,CD9,EFNB1,EFNB2,EPCAM,EPHA2,EPHB1,SCARB1,STEAP3,VAMP2
GO:0055037	recycling endosome	4	0.0038	ENSP00000354995,ENSP00000357564,ENSP00000399511,ENSP00000452780	ABCG1,B2M,RAB13,TNIK
GO:0031090	organelle membrane	15	0.0042	ENSP00000251968,ENSP00000253794,ENSP00000261693,ENSP00000297265,ENSP00000314214,ENSP00000354995,ENSP00000357564,ENSP00000371958,ENSP00000376345,ENSP00000376822,ENSP00000381097,ENSP00000441543,ENSP00000447730,ENSP00000452780,ENSP00000477590	ABCG1,B2M,CD63,CD9,CHMP4C,CPNE3,EPHB1,GRB2,RAB13,SCARB1,STEAP3,TSG101,UBC,VAMP2,VPS25
GO:0009986	cell surface	7	0.005	ENSP00000261693,ENSP00000263735,ENSP00000351209,ENSP00000354995,ENSP00000371958,ENSP00000447730,ENSP00000452780	ABCG1,B2M,CD63,CD9,EPCAM,EPHA2,SCARB1
GO:0032993	protein-DNA complex	4	0.0058	ENSP00000344456,ENSP00000355778,ENSP00000375942,ENSP00000475814	CTNNB1,H3F3A,HIST2H2AA3,TBP
GO:0005737	cytoplasm	34	0.0089	ENSP00000204961,ENSP00000251968,ENSP00000252655,ENSP00000253794,ENSP00000261693,ENSP00000263826,ENSP00000264039,ENSP00000278715,ENSP00000297265,ENSP00000300574,ENSP00000302961,ENSP00000314214,ENSP00000331901,ENSP00000344456,ENSP00000354995,ENSP00000357564,ENSP00000359380,ENSP00000364801,ENSP00000367545,ENSP00000367623,ENSP00000371958,ENSP00000375730,ENSP00000375942,ENSP00000376345,ENSP00000376822…	ABCG1,AKT3,B2M,CD63,CD9,CHMP4C,CPNE3,CRK,CTNNB1,EEF1G,EFNB1,EPHB1,GPC1,GRB2,HMBS,HSPA14,HSPA1B,HSPA4,MAGEA3,PDCD6IP,RAB13,RPL13A,RSPH3,SCARB1,SCD,STEAP3,TBP,TNIK,TP73,TPT1,TSG101,UBC,VAMP2,VPS25
GO:0045177	apical part of cell	5	0.0089	ENSP00000006724,ENSP00000263735,ENSP00000344456,ENSP00000371958,ENSP00000399511	CD9,CEACAM7,CTNNB1,EPCAM,TNIK
GO:0031528	microvillus membrane	2	0.0094	ENSP00000261693,ENSP00000344456	CTNNB1,SCARB1
GO:0005719	nuclear euchromatin	2	0.0099	ENSP00000344456,ENSP00000375942	CTNNB1,TBP
GO:0005576	extracellular region	13	0.0117	ENSP00000006724,ENSP00000251968,ENSP00000263645,ENSP00000264039,ENSP00000302961,ENSP00000355778,ENSP00000364801,ENSP00000371958,ENSP00000381097,ENSP00000411825,ENSP00000447730,ENSP00000452780,ENSP00000477781	B2M,CD63,CD81,CD9,CEACAM7,EPHB1,GPC1,H3F3A,HSPA1B,HSPA4,PDCD6IP,TPT1,TSG101
GO:0005911	cell-cell junction	5	0.0117	ENSP00000263735,ENSP00000344456,ENSP00000357564,ENSP00000376345,ENSP00000411825	CTNNB1,EPCAM,GRB2,PDCD6IP,RAB13
GO:0016020	membrane	28	0.0117	ENSP00000006724,ENSP00000204961,ENSP00000245323,ENSP00000251968,ENSP00000253794,ENSP00000261693,ENSP00000263645,ENSP00000263735,ENSP00000263826,ENSP00000264039,ENSP00000297265,ENSP00000300574,ENSP00000314214,ENSP00000344456,ENSP00000351209,ENSP00000354995,ENSP00000357564,ENSP00000359380,ENSP00000371958,ENSP00000376345,ENSP00000376822,ENSP00000381097,ENSP00000399511,ENSP00000411825,ENSP00000441543…	ABCG1,AKT3,B2M,CD63,CD81,CD9,CEACAM7,CHMP4C,CPNE3,CRK,CTNNB1,EFNB1,EFNB2,EPCAM,EPHA2,EPHB1,GPC1,GRB2,PDCD6IP,RAB13,SCARB1,SCD,STEAP3,TNIK,TSG101,UBC,VAMP2,VPS25
GO:0030141	secretory granule	7	0.0117	ENSP00000314214,ENSP00000357564,ENSP00000364801,ENSP00000371958,ENSP00000447730,ENSP00000452780,ENSP00000477590	B2M,CD63,CD9,CPNE3,HSPA1B,RAB13,VAMP2
GO:0044444	cytoplasmic part	30	0.0117	ENSP00000251968,ENSP00000253794,ENSP00000261693,ENSP00000264039,ENSP00000278715,ENSP00000297265,ENSP00000300574,ENSP00000302961,ENSP00000314214,ENSP00000331901,ENSP00000344456,ENSP00000354995,ENSP00000357564,ENSP00000359380,ENSP00000364801,ENSP00000367545,ENSP00000367623,ENSP00000371958,ENSP00000375730,ENSP00000376345,ENSP00000376822,ENSP00000381097,ENSP00000399511,ENSP00000411825,ENSP00000441543…	ABCG1,B2M,CD63,CD9,CHMP4C,CPNE3,CRK,CTNNB1,EEF1G,EPHB1,GPC1,GRB2,HMBS,HSPA14,HSPA1B,HSPA4,MAGEA3,PDCD6IP,RAB13,RPL13A,SCARB1,SCD,STEAP3,TNIK,TP73,TPT1,TSG101,UBC,VAMP2,VPS25
GO:0098590	plasma membrane region	8	0.0117	ENSP00000006724,ENSP00000261693,ENSP00000263645,ENSP00000263735,ENSP00000344456,ENSP00000351209,ENSP00000371958,ENSP00000399511	CD81,CD9,CEACAM7,CTNNB1,EPCAM,EPHA2,SCARB1,TNIK
GO:0001772	immunological synapse	2	0.0137	ENSP00000263645,ENSP00000411825	CD81,PDCD6IP
GO:0005615	extracellular space	8	0.0151	ENSP00000251968,ENSP00000263645,ENSP00000264039,ENSP00000302961,ENSP00000371958,ENSP00000411825,ENSP00000447730,ENSP00000477781	CD63,CD81,CD9,GPC1,HSPA4,PDCD6IP,TPT1,TSG101
GO:0031902	late endosome membrane	3	0.0151	ENSP00000251968,ENSP00000297265,ENSP00000447730	CD63,CHMP4C,TSG101
GO:0031904	endosome lumen	2	0.0151	ENSP00000447730,ENSP00000452780	B2M,CD63
GO:0031901	early endosome membrane	3	0.0207	ENSP00000251968,ENSP00000381097,ENSP00000452780	B2M,EPHB1,TSG101
GO:0000785	chromatin	5	0.0209	ENSP00000344456,ENSP00000355778,ENSP00000367545,ENSP00000375942,ENSP00000475814	CTNNB1,H3F3A,HIST2H2AA3,TBP,TP73
GO:0030667	secretory granule membrane	4	0.0209	ENSP00000314214,ENSP00000371958,ENSP00000447730,ENSP00000477590	CD63,CD9,CPNE3,VAMP2
GO:0044464	cell part	41	0.0209	ENSP00000006724,ENSP00000204961,ENSP00000245323,ENSP00000251968,ENSP00000252655,ENSP00000253794,ENSP00000261693,ENSP00000263645,ENSP00000263735,ENSP00000263826,ENSP00000264039,ENSP00000278715,ENSP00000297265,ENSP00000300574,ENSP00000302961,ENSP00000314214,ENSP00000331901,ENSP00000344456,ENSP00000351209,ENSP00000354995,ENSP00000355778,ENSP00000357564,ENSP00000359380,ENSP00000364801,ENSP00000367545…	ABCG1,AKT3,B2M,CD63,CD81,CD9,CEACAM7,CHMP4C,CPNE3,CRK,CTNNB1,EEF1G,EFNB1,EFNB2,EPCAM,EPHA2,EPHB1,GPC1,GRB2,H3F3A,HIST2H2AA3,HMBS,HSPA14,HSPA1B,HSPA4,MAGEA3,PDCD6IP,RAB13,RPL13A,RSPH3,SCARB1,SCD,STEAP3,TBP,TNIK,TP73,TPT1,TSG101,UBC,VAMP2,VPS25
GO:0016324	apical plasma membrane	4	0.0215	ENSP00000006724,ENSP00000263735,ENSP00000371958,ENSP00000399511	CD9,CEACAM7,EPCAM,TNIK
GO:0030662	coated vesicle membrane	3	0.0255	ENSP00000314214,ENSP00000371958,ENSP00000452780	B2M,CD9,VAMP2
GO:0000790	nuclear chromatin	4	0.0273	ENSP00000344456,ENSP00000355778,ENSP00000375942,ENSP00000475814	CTNNB1,H3F3A,HIST2H2AA3,TBP
GO:0098796	membrane protein complex	7	0.0308	ENSP00000251968,ENSP00000253794,ENSP00000297265,ENSP00000314214,ENSP00000344456,ENSP00000376345,ENSP00000452780	B2M,CHMP4C,CTNNB1,GRB2,TSG101,VAMP2,VPS25
GO:0035577	azurophil granule membrane	2	0.0327	ENSP00000447730,ENSP00000477590	CD63,CPNE3
GO:0030027	lamellipodium	3	0.0344	ENSP00000344456,ENSP00000351209,ENSP00000357564	CTNNB1,EPHA2,RAB13
GO:0098858	actin-based cell projection	3	0.0369	ENSP00000261693,ENSP00000344456,ENSP00000381097	CTNNB1,EPHB1,SCARB1
GO:0043227	membrane-bounded organelle	32	0.0404	ENSP00000204961,ENSP00000251968,ENSP00000253794,ENSP00000261693,ENSP00000263645,ENSP00000263826,ENSP00000264039,ENSP00000297265,ENSP00000300574,ENSP00000302961,ENSP00000314214,ENSP00000344456,ENSP00000354995,ENSP00000355778,ENSP00000357564,ENSP00000359380,ENSP00000364801,ENSP00000367545,ENSP00000371958,ENSP00000375942,ENSP00000376345,ENSP00000376822,ENSP00000381097,ENSP00000399511,ENSP00000411825…	ABCG1,AKT3,B2M,CD63,CD81,CD9,CHMP4C,CPNE3,CRK,CTNNB1,EFNB1,EPHB1,GPC1,GRB2,H3F3A,HIST2H2AA3,HSPA1B,HSPA4,MAGEA3,PDCD6IP,RAB13,SCARB1,SCD,STEAP3,TBP,TNIK,TP73,TPT1,TSG101,UBC,VAMP2,VPS25
GO:0016323	basolateral plasma membrane	3	0.0474	ENSP00000263645,ENSP00000263735,ENSP00000344456	CD81,CTNNB1,EPCAM
GO:0005901	caveola	2	0.0489	ENSP00000261693,ENSP00000344456	CTNNB1,SCARB1
GO:0043226	organelle	34	0.0489	ENSP00000204961,ENSP00000251968,ENSP00000252655,ENSP00000253794,ENSP00000261693,ENSP00000263645,ENSP00000263826,ENSP00000264039,ENSP00000297265,ENSP00000300574,ENSP00000302961,ENSP00000314214,ENSP00000344456,ENSP00000354995,ENSP00000355778,ENSP00000357564,ENSP00000359380,ENSP00000364801,ENSP00000367545,ENSP00000371958,ENSP00000375730,ENSP00000375942,ENSP00000376345,ENSP00000376822,ENSP00000381097…	ABCG1,AKT3,B2M,CD63,CD81,CD9,CHMP4C,CPNE3,CRK,CTNNB1,EFNB1,EPHB1,GPC1,GRB2,H3F3A,HIST2H2AA3,HSPA1B,HSPA4,MAGEA3,PDCD6IP,RAB13,RPL13A,RSPH3,SCARB1,SCD,STEAP3,TBP,TNIK,TP73,TPT1,TSG101,UBC,VAMP2,VPS25
GO:0055038	recycling endosome membrane	2	0.0489	ENSP00000357564,ENSP00000452780	B2M,RAB13

## Sheet: Exosome biological process
#pathway ID	pathway description	observed gene count	false discovery rate	matching proteins in your network (IDs)	matching proteins in your network (labels)
GO:0044403	symbiont process	14	1.11e-07	ENSP00000245323,ENSP00000251968,ENSP00000261693,ENSP00000263645,ENSP00000297265,ENSP00000344456,ENSP00000351209,ENSP00000364801,ENSP00000367545,ENSP00000375942,ENSP00000376345,ENSP00000411825,ENSP00000441543,ENSP00000452780	B2M,CD81,CHMP4C,CTNNB1,EFNB2,EPHA2,GRB2,HSPA1B,PDCD6IP,SCARB1,TBP,TP73,TSG101,UBC
GO:0016032	viral process	13	1.12e-07	ENSP00000245323,ENSP00000251968,ENSP00000261693,ENSP00000263645,ENSP00000297265,ENSP00000351209,ENSP00000364801,ENSP00000367545,ENSP00000375942,ENSP00000376345,ENSP00000411825,ENSP00000441543,ENSP00000452780	B2M,CD81,CHMP4C,EFNB2,EPHA2,GRB2,HSPA1B,PDCD6IP,SCARB1,TBP,TP73,TSG101,UBC
GO:0019058	viral life cycle	9	1.12e-07	ENSP00000245323,ENSP00000251968,ENSP00000261693,ENSP00000263645,ENSP00000297265,ENSP00000351209,ENSP00000364801,ENSP00000411825,ENSP00000441543	CD81,CHMP4C,EFNB2,EPHA2,HSPA1B,PDCD6IP,SCARB1,TSG101,UBC
GO:0051179	localization	30	9.39e-07	ENSP00000204961,ENSP00000245323,ENSP00000251968,ENSP00000253794,ENSP00000261693,ENSP00000263645,ENSP00000263735,ENSP00000264039,ENSP00000297265,ENSP00000300574,ENSP00000302961,ENSP00000314214,ENSP00000344456,ENSP00000351209,ENSP00000354995,ENSP00000357564,ENSP00000364801,ENSP00000367545,ENSP00000371958,ENSP00000375730,ENSP00000376345,ENSP00000376822,ENSP00000381097,ENSP00000399511,ENSP00000411825…	ABCG1,B2M,CD63,CD81,CD9,CHMP4C,CPNE3,CRK,CTNNB1,EFNB1,EFNB2,EPCAM,EPHA2,EPHB1,GPC1,GRB2,HSPA1B,HSPA4,PDCD6IP,RAB13,RPL13A,SCARB1,STEAP3,TNIK,TP73,TPT1,TSG101,UBC,VAMP2,VPS25
GO:0030260	entry into host cell	7	1.01e-06	ENSP00000245323,ENSP00000261693,ENSP00000263645,ENSP00000344456,ENSP00000351209,ENSP00000364801,ENSP00000376345	CD81,CTNNB1,EFNB2,EPHA2,GRB2,HSPA1B,SCARB1
GO:0051704	multi-organism process	19	8.6e-06	ENSP00000245323,ENSP00000251968,ENSP00000261693,ENSP00000263645,ENSP00000297265,ENSP00000300574,ENSP00000331901,ENSP00000344456,ENSP00000351209,ENSP00000355778,ENSP00000364801,ENSP00000367545,ENSP00000371958,ENSP00000375942,ENSP00000376345,ENSP00000411825,ENSP00000441543,ENSP00000452780,ENSP00000477781	B2M,CD81,CD9,CHMP4C,CRK,CTNNB1,EEF1G,EFNB2,EPHA2,GRB2,H3F3A,HSPA1B,PDCD6IP,SCARB1,TBP,TP73,TPT1,TSG101,UBC
GO:0016192	vesicle-mediated transport	16	3.74e-05	ENSP00000251968,ENSP00000253794,ENSP00000261693,ENSP00000263645,ENSP00000297265,ENSP00000300574,ENSP00000314214,ENSP00000344456,ENSP00000357564,ENSP00000364801,ENSP00000371958,ENSP00000376345,ENSP00000441543,ENSP00000447730,ENSP00000452780,ENSP00000477590	B2M,CD63,CD81,CD9,CHMP4C,CPNE3,CRK,CTNNB1,GRB2,HSPA1B,RAB13,SCARB1,TSG101,UBC,VAMP2,VPS25
GO:0016477	cell migration	11	0.00015	ENSP00000204961,ENSP00000245323,ENSP00000261693,ENSP00000263735,ENSP00000264039,ENSP00000344456,ENSP00000351209,ENSP00000357564,ENSP00000376345,ENSP00000381097,ENSP00000447730	CD63,CTNNB1,EFNB1,EFNB2,EPCAM,EPHA2,EPHB1,GPC1,GRB2,RAB13,SCARB1
GO:0036258	multivesicular body assembly	4	0.00015	ENSP00000251968,ENSP00000253794,ENSP00000297265,ENSP00000411825	CHMP4C,PDCD6IP,TSG101,VPS25
GO:0048013	ephrin receptor signaling pathway	5	0.00015	ENSP00000204961,ENSP00000245323,ENSP00000300574,ENSP00000351209,ENSP00000381097	CRK,EFNB1,EFNB2,EPHA2,EPHB1
GO:0048585	negative regulation of response to stimulus	14	0.00019	ENSP00000251968,ENSP00000253794,ENSP00000263826,ENSP00000264039,ENSP00000300574,ENSP00000344456,ENSP00000351209,ENSP00000364801,ENSP00000367545,ENSP00000371958,ENSP00000376345,ENSP00000441543,ENSP00000473093,ENSP00000477781	AKT3,CD9,CRK,CTNNB1,EPHA2,GPC1,GRB2,HSPA1B,MAGEA3,TP73,TPT1,TSG101,UBC,VPS25
GO:0019068	virion assembly	4	0.00021	ENSP00000251968,ENSP00000297265,ENSP00000411825,ENSP00000441543	CHMP4C,PDCD6IP,TSG101,UBC
GO:0006810	transport	23	0.00022	ENSP00000251968,ENSP00000253794,ENSP00000261693,ENSP00000263645,ENSP00000297265,ENSP00000300574,ENSP00000302961,ENSP00000314214,ENSP00000344456,ENSP00000354995,ENSP00000357564,ENSP00000364801,ENSP00000367545,ENSP00000371958,ENSP00000375730,ENSP00000376345,ENSP00000376822,ENSP00000411825,ENSP00000441543,ENSP00000447730,ENSP00000452780,ENSP00000477590,ENSP00000477781	ABCG1,B2M,CD63,CD81,CD9,CHMP4C,CPNE3,CRK,CTNNB1,GRB2,HSPA1B,HSPA4,PDCD6IP,RAB13,RPL13A,SCARB1,STEAP3,TP73,TPT1,TSG101,UBC,VAMP2,VPS25
GO:0043408	regulation of MAPK cascade	10	0.00022	ENSP00000251968,ENSP00000263645,ENSP00000300574,ENSP00000344456,ENSP00000351209,ENSP00000367545,ENSP00000376345,ENSP00000381097,ENSP00000399511,ENSP00000441543	CD81,CRK,CTNNB1,EPHA2,EPHB1,GRB2,TNIK,TP73,TSG101,UBC
GO:0046718	viral entry into host cell	5	0.00022	ENSP00000245323,ENSP00000261693,ENSP00000263645,ENSP00000351209,ENSP00000364801	CD81,EFNB2,EPHA2,HSPA1B,SCARB1
GO:0051128	regulation of cellular component organization	17	0.00022	ENSP00000245323,ENSP00000251968,ENSP00000261693,ENSP00000297265,ENSP00000300574,ENSP00000344456,ENSP00000351209,ENSP00000355778,ENSP00000364801,ENSP00000367545,ENSP00000375730,ENSP00000376345,ENSP00000381097,ENSP00000399511,ENSP00000411825,ENSP00000447730,ENSP00000452780	B2M,CD63,CHMP4C,CRK,CTNNB1,EFNB2,EPHA2,EPHB1,GRB2,H3F3A,HSPA1B,PDCD6IP,RPL13A,SCARB1,TNIK,TP73,TSG101
GO:0080134	regulation of response to stress	13	0.00022	ENSP00000261693,ENSP00000263645,ENSP00000263826,ENSP00000300574,ENSP00000344456,ENSP00000364801,ENSP00000367545,ENSP00000371958,ENSP00000381097,ENSP00000399511,ENSP00000441543,ENSP00000473093,ENSP00000477781	AKT3,CD81,CD9,CRK,CTNNB1,EPHB1,HSPA1B,MAGEA3,SCARB1,TNIK,TP73,TPT1,UBC
GO:1902531	regulation of intracellular signal transduction	15	0.00022	ENSP00000251968,ENSP00000263645,ENSP00000263826,ENSP00000300574,ENSP00000344456,ENSP00000351209,ENSP00000364801,ENSP00000367545,ENSP00000375942,ENSP00000376345,ENSP00000381097,ENSP00000399511,ENSP00000441543,ENSP00000473093,ENSP00000477781	AKT3,CD81,CRK,CTNNB1,EPHA2,EPHB1,GRB2,HSPA1B,MAGEA3,TBP,TNIK,TP73,TPT1,TSG101,UBC
GO:0022607	cellular component assembly	17	0.00024	ENSP00000251968,ENSP00000253794,ENSP00000264039,ENSP00000297265,ENSP00000300574,ENSP00000302961,ENSP00000314214,ENSP00000344456,ENSP00000355778,ENSP00000357564,ENSP00000367545,ENSP00000371958,ENSP00000375942,ENSP00000376345,ENSP00000399511,ENSP00000411825,ENSP00000441543	CD9,CHMP4C,CRK,CTNNB1,GPC1,GRB2,H3F3A,HSPA4,PDCD6IP,RAB13,TBP,TNIK,TP73,TSG101,UBC,VAMP2,VPS25
GO:0048583	regulation of response to stimulus	22	0.00024	ENSP00000245323,ENSP00000251968,ENSP00000253794,ENSP00000261693,ENSP00000263645,ENSP00000263826,ENSP00000264039,ENSP00000300574,ENSP00000344456,ENSP00000351209,ENSP00000364801,ENSP00000367545,ENSP00000371958,ENSP00000375942,ENSP00000376345,ENSP00000381097,ENSP00000399511,ENSP00000441543,ENSP00000447730,ENSP00000452780,ENSP00000473093,ENSP00000477781	AKT3,B2M,CD63,CD81,CD9,CRK,CTNNB1,EFNB2,EPHA2,EPHB1,GPC1,GRB2,HSPA1B,MAGEA3,SCARB1,TBP,TNIK,TP73,TPT1,TSG101,UBC,VPS25
GO:0048518	positive regulation of biological process	26	0.00034	ENSP00000204961,ENSP00000245323,ENSP00000251968,ENSP00000261693,ENSP00000263645,ENSP00000263735,ENSP00000263826,ENSP00000264039,ENSP00000297265,ENSP00000300574,ENSP00000314214,ENSP00000344456,ENSP00000351209,ENSP00000354995,ENSP00000355778,ENSP00000364801,ENSP00000367545,ENSP00000375942,ENSP00000376345,ENSP00000381097,ENSP00000399511,ENSP00000411825,ENSP00000441543,ENSP00000447730,ENSP00000452780…	ABCG1,AKT3,B2M,CD63,CD81,CHMP4C,CPNE3,CRK,CTNNB1,EFNB1,EFNB2,EPCAM,EPHA2,EPHB1,GPC1,GRB2,H3F3A,HSPA1B,PDCD6IP,SCARB1,TBP,TNIK,TP73,TSG101,UBC,VAMP2
GO:0016043	cellular component organization	25	0.00046	ENSP00000204961,ENSP00000245323,ENSP00000251968,ENSP00000253794,ENSP00000261693,ENSP00000263826,ENSP00000264039,ENSP00000297265,ENSP00000300574,ENSP00000302961,ENSP00000314214,ENSP00000344456,ENSP00000351209,ENSP00000354995,ENSP00000355778,ENSP00000357564,ENSP00000367545,ENSP00000371958,ENSP00000375942,ENSP00000376345,ENSP00000381097,ENSP00000399511,ENSP00000411825,ENSP00000441543,ENSP00000475814	ABCG1,AKT3,CD9,CHMP4C,CRK,CTNNB1,EFNB1,EFNB2,EPHA2,EPHB1,GPC1,GRB2,H3F3A,HIST2H2AA3,HSPA4,PDCD6IP,RAB13,SCARB1,TBP,TNIK,TP73,TSG101,UBC,VAMP2,VPS25
GO:0048523	negative regulation of cellular process	23	0.0005	ENSP00000245323,ENSP00000251968,ENSP00000253794,ENSP00000263735,ENSP00000263826,ENSP00000264039,ENSP00000297265,ENSP00000300574,ENSP00000344456,ENSP00000351209,ENSP00000354995,ENSP00000355778,ENSP00000364801,ENSP00000367545,ENSP00000371958,ENSP00000375730,ENSP00000376345,ENSP00000381097,ENSP00000441543,ENSP00000452780,ENSP00000473093,ENSP00000475814,ENSP00000477781	ABCG1,AKT3,B2M,CD9,CHMP4C,CRK,CTNNB1,EFNB2,EPCAM,EPHA2,EPHB1,GPC1,GRB2,H3F3A,HIST2H2AA3,HSPA1B,MAGEA3,RPL13A,TP73,TPT1,TSG101,UBC,VPS25
GO:0008104	protein localization	15	0.00052	ENSP00000251968,ENSP00000253794,ENSP00000263645,ENSP00000297265,ENSP00000302961,ENSP00000314214,ENSP00000344456,ENSP00000354995,ENSP00000357564,ENSP00000375730,ENSP00000376822,ENSP00000399511,ENSP00000411825,ENSP00000441543,ENSP00000447730	ABCG1,CD63,CD81,CHMP4C,CTNNB1,HSPA4,PDCD6IP,RAB13,RPL13A,STEAP3,TNIK,TSG101,UBC,VAMP2,VPS25
GO:0016202	regulation of striated muscle tissue development	5	0.00058	ENSP00000245323,ENSP00000264039,ENSP00000344456,ENSP00000367545,ENSP00000381097	CTNNB1,EFNB2,EPHB1,GPC1,TP73
GO:0022610	biological adhesion	10	0.00059	ENSP00000204961,ENSP00000245323,ENSP00000261693,ENSP00000263645,ENSP00000263735,ENSP00000344456,ENSP00000351209,ENSP00000371958,ENSP00000381097,ENSP00000447730	CD63,CD81,CD9,CTNNB1,EFNB1,EFNB2,EPCAM,EPHA2,EPHB1,SCARB1
GO:0033036	macromolecule localization	16	0.00059	ENSP00000251968,ENSP00000253794,ENSP00000261693,ENSP00000263645,ENSP00000297265,ENSP00000302961,ENSP00000314214,ENSP00000344456,ENSP00000354995,ENSP00000357564,ENSP00000375730,ENSP00000376822,ENSP00000399511,ENSP00000411825,ENSP00000441543,ENSP00000447730	ABCG1,CD63,CD81,CHMP4C,CTNNB1,HSPA4,PDCD6IP,RAB13,RPL13A,SCARB1,STEAP3,TNIK,TSG101,UBC,VAMP2,VPS25
GO:0044087	regulation of cellular component biogenesis	10	0.00067	ENSP00000251968,ENSP00000297265,ENSP00000344456,ENSP00000351209,ENSP00000355778,ENSP00000364801,ENSP00000375730,ENSP00000376345,ENSP00000381097,ENSP00000411825	CHMP4C,CTNNB1,EPHA2,EPHB1,GRB2,H3F3A,HSPA1B,PDCD6IP,RPL13A,TSG101
GO:0002376	immune system process	16	0.00086	ENSP00000204961,ENSP00000261693,ENSP00000263735,ENSP00000264039,ENSP00000300574,ENSP00000314214,ENSP00000344456,ENSP00000351209,ENSP00000364801,ENSP00000375730,ENSP00000376345,ENSP00000381097,ENSP00000441543,ENSP00000447730,ENSP00000452780,ENSP00000477590	B2M,CD63,CPNE3,CRK,CTNNB1,EFNB1,EPCAM,EPHA2,EPHB1,GPC1,GRB2,HSPA1B,RPL13A,SCARB1,UBC,VAMP2
GO:0039702	viral budding via host ESCRT complex	3	0.00093	ENSP00000251968,ENSP00000297265,ENSP00000411825	CHMP4C,PDCD6IP,TSG101
GO:0010646	regulation of cell communication	19	0.00099	ENSP00000251968,ENSP00000253794,ENSP00000263645,ENSP00000263826,ENSP00000264039,ENSP00000300574,ENSP00000314214,ENSP00000344456,ENSP00000351209,ENSP00000364801,ENSP00000367545,ENSP00000375942,ENSP00000376345,ENSP00000381097,ENSP00000399511,ENSP00000441543,ENSP00000447730,ENSP00000473093,ENSP00000477781	AKT3,CD63,CD81,CRK,CTNNB1,EPHA2,EPHB1,GPC1,GRB2,HSPA1B,MAGEA3,TBP,TNIK,TP73,TPT1,TSG101,UBC,VAMP2,VPS25
GO:0009966	regulation of signal transduction	18	0.0011	ENSP00000251968,ENSP00000253794,ENSP00000263645,ENSP00000263826,ENSP00000264039,ENSP00000300574,ENSP00000344456,ENSP00000351209,ENSP00000364801,ENSP00000367545,ENSP00000375942,ENSP00000376345,ENSP00000381097,ENSP00000399511,ENSP00000441543,ENSP00000447730,ENSP00000473093,ENSP00000477781	AKT3,CD63,CD81,CRK,CTNNB1,EPHA2,EPHB1,GPC1,GRB2,HSPA1B,MAGEA3,TBP,TNIK,TP73,TPT1,TSG101,UBC,VPS25
GO:0009968	negative regulation of signal transduction	11	0.0011	ENSP00000251968,ENSP00000253794,ENSP00000264039,ENSP00000344456,ENSP00000351209,ENSP00000364801,ENSP00000367545,ENSP00000376345,ENSP00000441543,ENSP00000473093,ENSP00000477781	CTNNB1,EPHA2,GPC1,GRB2,HSPA1B,MAGEA3,TP73,TPT1,TSG101,UBC,VPS25
GO:0015031	protein transport	12	0.0011	ENSP00000251968,ENSP00000253794,ENSP00000297265,ENSP00000302961,ENSP00000314214,ENSP00000354995,ENSP00000357564,ENSP00000375730,ENSP00000376822,ENSP00000411825,ENSP00000441543,ENSP00000447730	ABCG1,CD63,CHMP4C,HSPA4,PDCD6IP,RAB13,RPL13A,STEAP3,TSG101,UBC,VAMP2,VPS25
GO:0023051	regulation of signaling	19	0.0011	ENSP00000251968,ENSP00000253794,ENSP00000263645,ENSP00000263826,ENSP00000264039,ENSP00000300574,ENSP00000314214,ENSP00000344456,ENSP00000351209,ENSP00000364801,ENSP00000367545,ENSP00000375942,ENSP00000376345,ENSP00000381097,ENSP00000399511,ENSP00000441543,ENSP00000447730,ENSP00000473093,ENSP00000477781	AKT3,CD63,CD81,CRK,CTNNB1,EPHA2,EPHB1,GPC1,GRB2,HSPA1B,MAGEA3,TBP,TNIK,TP73,TPT1,TSG101,UBC,VAMP2,VPS25
GO:0071402	cellular response to lipoprotein particle stimulus	3	0.0011	ENSP00000263645,ENSP00000354995,ENSP00000371958	ABCG1,CD81,CD9
GO:0042221	response to chemical	21	0.0015	ENSP00000204961,ENSP00000245323,ENSP00000261693,ENSP00000263645,ENSP00000264039,ENSP00000300574,ENSP00000302961,ENSP00000314214,ENSP00000344456,ENSP00000351209,ENSP00000354995,ENSP00000357564,ENSP00000364801,ENSP00000367545,ENSP00000371958,ENSP00000375730,ENSP00000376345,ENSP00000381097,ENSP00000441543,ENSP00000452780,ENSP00000477590	ABCG1,B2M,CD81,CD9,CPNE3,CRK,CTNNB1,EFNB1,EFNB2,EPHA2,EPHB1,GPC1,GRB2,HSPA1B,HSPA4,RAB13,RPL13A,SCARB1,TP73,UBC,VAMP2
GO:0048522	positive regulation of cellular process	23	0.0015	ENSP00000204961,ENSP00000245323,ENSP00000251968,ENSP00000261693,ENSP00000263645,ENSP00000263735,ENSP00000263826,ENSP00000264039,ENSP00000300574,ENSP00000314214,ENSP00000344456,ENSP00000355778,ENSP00000364801,ENSP00000367545,ENSP00000375942,ENSP00000376345,ENSP00000381097,ENSP00000399511,ENSP00000411825,ENSP00000441543,ENSP00000447730,ENSP00000452780,ENSP00000477590	AKT3,B2M,CD63,CD81,CPNE3,CRK,CTNNB1,EFNB1,EFNB2,EPCAM,EPHB1,GPC1,GRB2,H3F3A,HSPA1B,PDCD6IP,SCARB1,TBP,TNIK,TP73,TSG101,UBC,VAMP2
GO:0019538	protein metabolic process	21	0.0016	ENSP00000204961,ENSP00000245323,ENSP00000251968,ENSP00000253794,ENSP00000263826,ENSP00000264039,ENSP00000278715,ENSP00000297265,ENSP00000331901,ENSP00000351209,ENSP00000354995,ENSP00000355778,ENSP00000357564,ENSP00000375730,ENSP00000376345,ENSP00000381097,ENSP00000399511,ENSP00000411825,ENSP00000441543,ENSP00000452780,ENSP00000477590	ABCG1,AKT3,B2M,CHMP4C,CPNE3,EEF1G,EFNB1,EFNB2,EPHA2,EPHB1,GPC1,GRB2,H3F3A,HMBS,PDCD6IP,RAB13,RPL13A,TNIK,TSG101,UBC,VPS25
GO:0080135	regulation of cellular response to stress	8	0.0017	ENSP00000263826,ENSP00000344456,ENSP00000364801,ENSP00000367545,ENSP00000381097,ENSP00000399511,ENSP00000473093,ENSP00000477781	AKT3,CTNNB1,EPHB1,HSPA1B,MAGEA3,TNIK,TP73,TPT1
GO:0016197	endosomal transport	5	0.0018	ENSP00000251968,ENSP00000253794,ENSP00000297265,ENSP00000357564,ENSP00000441543	CHMP4C,RAB13,TSG101,UBC,VPS25
GO:0043933	protein-containing complex subunit organization	13	0.002	ENSP00000251968,ENSP00000261693,ENSP00000300574,ENSP00000302961,ENSP00000314214,ENSP00000344456,ENSP00000354995,ENSP00000355778,ENSP00000367545,ENSP00000375942,ENSP00000376345,ENSP00000411825,ENSP00000441543	ABCG1,CRK,CTNNB1,GRB2,H3F3A,HSPA4,PDCD6IP,SCARB1,TBP,TP73,TSG101,UBC,VAMP2
GO:0044267	cellular protein metabolic process	19	0.0021	ENSP00000204961,ENSP00000245323,ENSP00000251968,ENSP00000253794,ENSP00000263826,ENSP00000278715,ENSP00000297265,ENSP00000331901,ENSP00000351209,ENSP00000355778,ENSP00000357564,ENSP00000375730,ENSP00000376345,ENSP00000381097,ENSP00000399511,ENSP00000411825,ENSP00000441543,ENSP00000452780,ENSP00000477590	AKT3,B2M,CHMP4C,CPNE3,EEF1G,EFNB1,EFNB2,EPHA2,EPHB1,GRB2,H3F3A,HMBS,PDCD6IP,RAB13,RPL13A,TNIK,TSG101,UBC,VPS25
GO:0018108	peptidyl-tyrosine phosphorylation	5	0.0022	ENSP00000204961,ENSP00000245323,ENSP00000351209,ENSP00000376345,ENSP00000381097	EFNB1,EFNB2,EPHA2,EPHB1,GRB2
GO:0006935	chemotaxis	7	0.0027	ENSP00000204961,ENSP00000245323,ENSP00000264039,ENSP00000351209,ENSP00000357564,ENSP00000376345,ENSP00000381097	EFNB1,EFNB2,EPHA2,EPHB1,GPC1,GRB2,RAB13
GO:0043405	regulation of MAP kinase activity	6	0.0027	ENSP00000251968,ENSP00000263645,ENSP00000300574,ENSP00000367545,ENSP00000399511,ENSP00000441543	CD81,CRK,TNIK,TP73,TSG101,UBC
GO:0000904	cell morphogenesis involved in differentiation	7	0.0028	ENSP00000204961,ENSP00000245323,ENSP00000264039,ENSP00000344456,ENSP00000351209,ENSP00000376345,ENSP00000381097	CTNNB1,EFNB1,EFNB2,EPHA2,EPHB1,GPC1,GRB2
GO:0007169	transmembrane receptor protein tyrosine kinase signaling pathway	7	0.0028	ENSP00000204961,ENSP00000245323,ENSP00000300574,ENSP00000351209,ENSP00000376345,ENSP00000381097,ENSP00000477590	CPNE3,CRK,EFNB1,EFNB2,EPHA2,EPHB1,GRB2
GO:0009605	response to external stimulus	13	0.0028	ENSP00000204961,ENSP00000245323,ENSP00000261693,ENSP00000264039,ENSP00000300574,ENSP00000331901,ENSP00000351209,ENSP00000357564,ENSP00000376345,ENSP00000381097,ENSP00000447730,ENSP00000452780,ENSP00000477781	B2M,CD63,CRK,EEF1G,EFNB1,EFNB2,EPHA2,EPHB1,GPC1,GRB2,RAB13,SCARB1,TPT1
GO:0040012	regulation of locomotion	9	0.0028	ENSP00000245323,ENSP00000251968,ENSP00000261693,ENSP00000263645,ENSP00000263826,ENSP00000297265,ENSP00000300574,ENSP00000351209,ENSP00000477590	AKT3,CD81,CHMP4C,CPNE3,CRK,EFNB2,EPHA2,SCARB1,TSG101
GO:0042127	regulation of cell population proliferation	12	0.0028	ENSP00000204961,ENSP00000245323,ENSP00000251968,ENSP00000263645,ENSP00000263735,ENSP00000263826,ENSP00000344456,ENSP00000364801,ENSP00000367545,ENSP00000371958,ENSP00000376345,ENSP00000381097	AKT3,CD81,CD9,CTNNB1,EFNB1,EFNB2,EPCAM,EPHB1,GRB2,HSPA1B,TP73,TSG101
GO:0090611	ubiquitin-independent protein catabolic process via the multivesicular body sorting pathway	2	0.0028	ENSP00000297265,ENSP00000411825	CHMP4C,PDCD6IP
GO:0042059	negative regulation of epidermal growth factor receptor signaling pathway	3	0.0029	ENSP00000251968,ENSP00000253794,ENSP00000376345	GRB2,TSG101,VPS25
GO:0044260	cellular macromolecule metabolic process	26	0.0029	ENSP00000204961,ENSP00000245323,ENSP00000251968,ENSP00000253794,ENSP00000263645,ENSP00000263826,ENSP00000264039,ENSP00000278715,ENSP00000297265,ENSP00000331901,ENSP00000344456,ENSP00000351209,ENSP00000355778,ENSP00000357564,ENSP00000364801,ENSP00000367545,ENSP00000371958,ENSP00000375730,ENSP00000375942,ENSP00000376345,ENSP00000381097,ENSP00000399511,ENSP00000411825,ENSP00000441543,ENSP00000452780…	AKT3,B2M,CD81,CD9,CHMP4C,CPNE3,CTNNB1,EEF1G,EFNB1,EFNB2,EPHA2,EPHB1,GPC1,GRB2,H3F3A,HMBS,HSPA1B,PDCD6IP,RAB13,RPL13A,TBP,TNIK,TP73,TSG101,UBC,VPS25
GO:0001932	regulation of protein phosphorylation	11	0.003	ENSP00000251968,ENSP00000253794,ENSP00000263645,ENSP00000300574,ENSP00000344456,ENSP00000351209,ENSP00000367545,ENSP00000376345,ENSP00000381097,ENSP00000399511,ENSP00000441543	CD81,CRK,CTNNB1,EPHA2,EPHB1,GRB2,TNIK,TP73,TSG101,UBC,VPS25
GO:0007167	enzyme linked receptor protein signaling pathway	8	0.003	ENSP00000204961,ENSP00000245323,ENSP00000300574,ENSP00000351209,ENSP00000376345,ENSP00000381097,ENSP00000441543,ENSP00000477590	CPNE3,CRK,EFNB1,EFNB2,EPHA2,EPHB1,GRB2,UBC
GO:0007411	axon guidance	5	0.003	ENSP00000204961,ENSP00000245323,ENSP00000264039,ENSP00000376345,ENSP00000381097	EFNB1,EFNB2,EPHB1,GPC1,GRB2
GO:0051130	positive regulation of cellular component organization	10	0.003	ENSP00000251968,ENSP00000300574,ENSP00000344456,ENSP00000364801,ENSP00000367545,ENSP00000376345,ENSP00000381097,ENSP00000411825,ENSP00000447730,ENSP00000452780	B2M,CD63,CRK,CTNNB1,EPHB1,GRB2,HSPA1B,PDCD6IP,TP73,TSG101
GO:0051649	establishment of localization in cell	12	0.003	ENSP00000251968,ENSP00000253794,ENSP00000297265,ENSP00000302961,ENSP00000314214,ENSP00000344456,ENSP00000354995,ENSP00000357564,ENSP00000375730,ENSP00000376822,ENSP00000441543,ENSP00000447730	ABCG1,CD63,CHMP4C,CTNNB1,HSPA4,RAB13,RPL13A,STEAP3,TSG101,UBC,VAMP2,VPS25
GO:0051641	cellular localization	14	0.0031	ENSP00000251968,ENSP00000253794,ENSP00000263645,ENSP00000297265,ENSP00000302961,ENSP00000314214,ENSP00000344456,ENSP00000354995,ENSP00000357564,ENSP00000375730,ENSP00000376822,ENSP00000399511,ENSP00000441543,ENSP00000447730	ABCG1,CD63,CD81,CHMP4C,CTNNB1,HSPA4,RAB13,RPL13A,STEAP3,TNIK,TSG101,UBC,VAMP2,VPS25
GO:0002682	regulation of immune system process	11	0.0032	ENSP00000204961,ENSP00000261693,ENSP00000263645,ENSP00000300574,ENSP00000344456,ENSP00000355778,ENSP00000364801,ENSP00000367545,ENSP00000376345,ENSP00000441543,ENSP00000452780	B2M,CD81,CRK,CTNNB1,EFNB1,GRB2,H3F3A,HSPA1B,SCARB1,TP73,UBC
GO:0006468	protein phosphorylation	9	0.0032	ENSP00000204961,ENSP00000245323,ENSP00000263826,ENSP00000351209,ENSP00000376345,ENSP00000381097,ENSP00000399511,ENSP00000441543,ENSP00000477590	AKT3,CPNE3,EFNB1,EFNB2,EPHA2,EPHB1,GRB2,TNIK,UBC
GO:0007166	cell surface receptor signaling pathway	14	0.0032	ENSP00000204961,ENSP00000245323,ENSP00000261693,ENSP00000263645,ENSP00000300574,ENSP00000344456,ENSP00000351209,ENSP00000371958,ENSP00000376345,ENSP00000381097,ENSP00000399511,ENSP00000441543,ENSP00000452780,ENSP00000477590	B2M,CD81,CD9,CPNE3,CRK,CTNNB1,EFNB1,EFNB2,EPHA2,EPHB1,GRB2,SCARB1,TNIK,UBC
GO:0010033	response to organic substance	16	0.0032	ENSP00000261693,ENSP00000263645,ENSP00000300574,ENSP00000302961,ENSP00000314214,ENSP00000344456,ENSP00000351209,ENSP00000354995,ENSP00000357564,ENSP00000367545,ENSP00000371958,ENSP00000375730,ENSP00000376345,ENSP00000441543,ENSP00000452780,ENSP00000477590	ABCG1,B2M,CD81,CD9,CPNE3,CRK,CTNNB1,EPHA2,GRB2,HSPA4,RAB13,RPL13A,SCARB1,TP73,UBC,VAMP2
GO:0019220	regulation of phosphate metabolic process	12	0.0032	ENSP00000251968,ENSP00000253794,ENSP00000261693,ENSP00000263645,ENSP00000300574,ENSP00000344456,ENSP00000351209,ENSP00000367545,ENSP00000376345,ENSP00000381097,ENSP00000399511,ENSP00000441543	CD81,CRK,CTNNB1,EPHA2,EPHB1,GRB2,SCARB1,TNIK,TP73,TSG101,UBC,VPS25
GO:0032989	cellular component morphogenesis	8	0.0032	ENSP00000204961,ENSP00000245323,ENSP00000264039,ENSP00000344456,ENSP00000351209,ENSP00000371958,ENSP00000376345,ENSP00000381097	CD9,CTNNB1,EFNB1,EFNB2,EPHA2,EPHB1,GPC1,GRB2
GO:0046907	intracellular transport	11	0.0032	ENSP00000251968,ENSP00000253794,ENSP00000297265,ENSP00000302961,ENSP00000314214,ENSP00000344456,ENSP00000354995,ENSP00000357564,ENSP00000375730,ENSP00000441543,ENSP00000447730	ABCG1,CD63,CHMP4C,CTNNB1,HSPA4,RAB13,RPL13A,TSG101,UBC,VAMP2,VPS25
GO:1901564	organonitrogen compound metabolic process	23	0.0032	ENSP00000204961,ENSP00000245323,ENSP00000251968,ENSP00000253794,ENSP00000263826,ENSP00000264039,ENSP00000278715,ENSP00000297265,ENSP00000331901,ENSP00000351209,ENSP00000354995,ENSP00000355778,ENSP00000357564,ENSP00000359380,ENSP00000364801,ENSP00000375730,ENSP00000376345,ENSP00000381097,ENSP00000399511,ENSP00000411825,ENSP00000441543,ENSP00000452780,ENSP00000477590	ABCG1,AKT3,B2M,CHMP4C,CPNE3,EEF1G,EFNB1,EFNB2,EPHA2,EPHB1,GPC1,GRB2,H3F3A,HMBS,HSPA1B,PDCD6IP,RAB13,RPL13A,SCD,TNIK,TSG101,UBC,VPS25
GO:1903551	regulation of extracellular exosome assembly	2	0.0032	ENSP00000251968,ENSP00000411825	PDCD6IP,TSG101
GO:0032879	regulation of localization	15	0.0033	ENSP00000251968,ENSP00000261693,ENSP00000263645,ENSP00000263826,ENSP00000300574,ENSP00000314214,ENSP00000344456,ENSP00000351209,ENSP00000354995,ENSP00000367545,ENSP00000371958,ENSP00000411825,ENSP00000447730,ENSP00000452780,ENSP00000477590	ABCG1,AKT3,B2M,CD63,CD81,CD9,CPNE3,CRK,CTNNB1,EPHA2,PDCD6IP,SCARB1,TP73,TSG101,VAMP2
GO:1902533	positive regulation of intracellular signal transduction	9	0.0038	ENSP00000263645,ENSP00000263826,ENSP00000300574,ENSP00000344456,ENSP00000364801,ENSP00000367545,ENSP00000376345,ENSP00000399511,ENSP00000441543	AKT3,CD81,CRK,CTNNB1,GRB2,HSPA1B,TNIK,TP73,UBC
GO:0065008	regulation of biological quality	18	0.0042	ENSP00000261693,ENSP00000263645,ENSP00000263826,ENSP00000300574,ENSP00000314214,ENSP00000344456,ENSP00000354995,ENSP00000355778,ENSP00000364801,ENSP00000367545,ENSP00000371958,ENSP00000376345,ENSP00000376822,ENSP00000381097,ENSP00000411825,ENSP00000441543,ENSP00000452780,ENSP00000477781	ABCG1,AKT3,B2M,CD81,CD9,CRK,CTNNB1,EPHB1,GRB2,H3F3A,HSPA1B,PDCD6IP,SCARB1,STEAP3,TP73,TPT1,UBC,VAMP2
GO:0035635	entry of bacterium into host cell	2	0.0043	ENSP00000344456,ENSP00000376345	CTNNB1,GRB2
GO:0050794	regulation of cellular process	34	0.0045	ENSP00000204961,ENSP00000245323,ENSP00000251968,ENSP00000253794,ENSP00000261693,ENSP00000263645,ENSP00000263735,ENSP00000263826,ENSP00000264039,ENSP00000297265,ENSP00000300574,ENSP00000314214,ENSP00000344456,ENSP00000351209,ENSP00000354995,ENSP00000355778,ENSP00000357564,ENSP00000364801,ENSP00000367545,ENSP00000371958,ENSP00000375730,ENSP00000375942,ENSP00000376345,ENSP00000376822,ENSP00000381097…	ABCG1,AKT3,B2M,CD63,CD81,CD9,CHMP4C,CPNE3,CRK,CTNNB1,EFNB1,EFNB2,EPCAM,EPHA2,EPHB1,GPC1,GRB2,H3F3A,HIST2H2AA3,HSPA1B,MAGEA3,PDCD6IP,RAB13,RPL13A,SCARB1,STEAP3,TBP,TNIK,TP73,TPT1,TSG101,UBC,VAMP2,VPS25
GO:0034329	cell junction assembly	4	0.0046	ENSP00000344456,ENSP00000357564,ENSP00000371958,ENSP00000411825	CD9,CTNNB1,PDCD6IP,RAB13
GO:0031399	regulation of protein modification process	12	0.0047	ENSP00000251968,ENSP00000253794,ENSP00000263645,ENSP00000300574,ENSP00000344456,ENSP00000351209,ENSP00000364801,ENSP00000367545,ENSP00000376345,ENSP00000381097,ENSP00000399511,ENSP00000441543	CD81,CRK,CTNNB1,EPHA2,EPHB1,GRB2,HSPA1B,TNIK,TP73,TSG101,UBC,VPS25
GO:0048641	regulation of skeletal muscle tissue development	3	0.0047	ENSP00000264039,ENSP00000344456,ENSP00000381097	CTNNB1,EPHB1,GPC1
GO:0071702	organic substance transport	13	0.005	ENSP00000251968,ENSP00000253794,ENSP00000261693,ENSP00000297265,ENSP00000302961,ENSP00000314214,ENSP00000354995,ENSP00000357564,ENSP00000375730,ENSP00000376822,ENSP00000411825,ENSP00000441543,ENSP00000447730	ABCG1,CD63,CHMP4C,HSPA4,PDCD6IP,RAB13,RPL13A,SCARB1,STEAP3,TSG101,UBC,VAMP2,VPS25
GO:0043406	positive regulation of MAP kinase activity	5	0.0053	ENSP00000263645,ENSP00000300574,ENSP00000367545,ENSP00000399511,ENSP00000441543	CD81,CRK,TNIK,TP73,UBC
GO:0050789	regulation of biological process	35	0.0053	ENSP00000204961,ENSP00000245323,ENSP00000251968,ENSP00000253794,ENSP00000261693,ENSP00000263645,ENSP00000263735,ENSP00000263826,ENSP00000264039,ENSP00000297265,ENSP00000300574,ENSP00000314214,ENSP00000344456,ENSP00000351209,ENSP00000354995,ENSP00000355778,ENSP00000357564,ENSP00000359380,ENSP00000364801,ENSP00000367545,ENSP00000371958,ENSP00000375730,ENSP00000375942,ENSP00000376345,ENSP00000376822…	ABCG1,AKT3,B2M,CD63,CD81,CD9,CHMP4C,CPNE3,CRK,CTNNB1,EFNB1,EFNB2,EPCAM,EPHA2,EPHB1,GPC1,GRB2,H3F3A,HIST2H2AA3,HSPA1B,MAGEA3,PDCD6IP,RAB13,RPL13A,SCARB1,SCD,STEAP3,TBP,TNIK,TP73,TPT1,TSG101,UBC,VAMP2,VPS25
GO:0031623	receptor internalization	3	0.0055	ENSP00000263645,ENSP00000371958,ENSP00000376345	CD81,CD9,GRB2
GO:0022008	neurogenesis	11	0.0056	ENSP00000204961,ENSP00000245323,ENSP00000264039,ENSP00000344456,ENSP00000357564,ENSP00000367545,ENSP00000371958,ENSP00000376345,ENSP00000381097,ENSP00000399511,ENSP00000452780	B2M,CD9,CTNNB1,EFNB1,EFNB2,EPHB1,GPC1,GRB2,RAB13,TNIK,TP73
GO:0001667	ameboidal-type cell migration	4	0.0058	ENSP00000204961,ENSP00000245323,ENSP00000261693,ENSP00000357564	EFNB1,EFNB2,RAB13,SCARB1
GO:0046605	regulation of centrosome cycle	3	0.0062	ENSP00000297265,ENSP00000344456,ENSP00000411825	CHMP4C,CTNNB1,PDCD6IP
GO:0031175	neuron projection development	7	0.0063	ENSP00000204961,ENSP00000245323,ENSP00000264039,ENSP00000344456,ENSP00000357564,ENSP00000376345,ENSP00000381097	CTNNB1,EFNB1,EFNB2,EPHB1,GPC1,GRB2,RAB13
GO:0043542	endothelial cell migration	3	0.0067	ENSP00000245323,ENSP00000261693,ENSP00000357564	EFNB2,RAB13,SCARB1
GO:0007155	cell adhesion	8	0.0072	ENSP00000204961,ENSP00000245323,ENSP00000263735,ENSP00000344456,ENSP00000351209,ENSP00000371958,ENSP00000381097,ENSP00000447730	CD63,CD9,CTNNB1,EFNB1,EFNB2,EPCAM,EPHA2,EPHB1
GO:0044265	cellular macromolecule catabolic process	8	0.0072	ENSP00000251968,ENSP00000253794,ENSP00000264039,ENSP00000297265,ENSP00000364801,ENSP00000375730,ENSP00000411825,ENSP00000441543	CHMP4C,GPC1,HSPA1B,PDCD6IP,RPL13A,TSG101,UBC,VPS25
GO:0048812	neuron projection morphogenesis	6	0.0072	ENSP00000204961,ENSP00000245323,ENSP00000264039,ENSP00000344456,ENSP00000376345,ENSP00000381097	CTNNB1,EFNB1,EFNB2,EPHB1,GPC1,GRB2
GO:0044406	adhesion of symbiont to host	2	0.0074	ENSP00000261693,ENSP00000263645	CD81,SCARB1
GO:0050896	response to stimulus	28	0.0078	ENSP00000204961,ENSP00000245323,ENSP00000261693,ENSP00000263645,ENSP00000263735,ENSP00000263826,ENSP00000264039,ENSP00000300574,ENSP00000302961,ENSP00000314214,ENSP00000331901,ENSP00000344456,ENSP00000351209,ENSP00000354995,ENSP00000355778,ENSP00000357564,ENSP00000364801,ENSP00000367545,ENSP00000371958,ENSP00000375730,ENSP00000376345,ENSP00000381097,ENSP00000399511,ENSP00000441543,ENSP00000447730…	ABCG1,AKT3,B2M,CD63,CD81,CD9,CPNE3,CRK,CTNNB1,EEF1G,EFNB1,EFNB2,EPCAM,EPHA2,EPHB1,GPC1,GRB2,H3F3A,HSPA1B,HSPA4,RAB13,RPL13A,SCARB1,TNIK,TP73,TPT1,UBC,VAMP2
GO:0030154	cell differentiation	17	0.008	ENSP00000204961,ENSP00000245323,ENSP00000251968,ENSP00000263735,ENSP00000264039,ENSP00000344456,ENSP00000351209,ENSP00000355778,ENSP00000357564,ENSP00000367545,ENSP00000371958,ENSP00000376345,ENSP00000381097,ENSP00000399511,ENSP00000447730,ENSP00000452780,ENSP00000477781	B2M,CD63,CD9,CTNNB1,EFNB1,EFNB2,EPCAM,EPHA2,EPHB1,GPC1,GRB2,H3F3A,RAB13,TNIK,TP73,TPT1,TSG101
GO:0010885	regulation of cholesterol storage	2	0.0081	ENSP00000261693,ENSP00000354995	ABCG1,SCARB1
GO:0032268	regulation of cellular protein metabolic process	14	0.0081	ENSP00000251968,ENSP00000253794,ENSP00000263645,ENSP00000300574,ENSP00000344456,ENSP00000351209,ENSP00000364801,ENSP00000367545,ENSP00000375730,ENSP00000376345,ENSP00000381097,ENSP00000399511,ENSP00000441543,ENSP00000473093	CD81,CRK,CTNNB1,EPHA2,EPHB1,GRB2,HSPA1B,MAGEA3,RPL13A,TNIK,TP73,TSG101,UBC,VPS25
GO:0010243	response to organonitrogen compound	8	0.0085	ENSP00000263645,ENSP00000300574,ENSP00000314214,ENSP00000344456,ENSP00000357564,ENSP00000367545,ENSP00000371958,ENSP00000376345	CD81,CD9,CRK,CTNNB1,GRB2,RAB13,TP73,VAMP2
GO:0045216	cell-cell junction organization	4	0.0085	ENSP00000344456,ENSP00000357564,ENSP00000371958,ENSP00000411825	CD9,CTNNB1,PDCD6IP,RAB13
GO:0045844	positive regulation of striated muscle tissue development	3	0.0085	ENSP00000245323,ENSP00000264039,ENSP00000344456	CTNNB1,EFNB2,GPC1
GO:1902115	regulation of organelle assembly	4	0.0085	ENSP00000251968,ENSP00000297265,ENSP00000364801,ENSP00000411825	CHMP4C,HSPA1B,PDCD6IP,TSG101
GO:0002684	positive regulation of immune system process	8	0.0086	ENSP00000204961,ENSP00000261693,ENSP00000263645,ENSP00000300574,ENSP00000364801,ENSP00000376345,ENSP00000441543,ENSP00000452780	B2M,CD81,CRK,EFNB1,GRB2,HSPA1B,SCARB1,UBC
GO:0007175	negative regulation of epidermal growth factor-activated receptor activity	2	0.0086	ENSP00000251968,ENSP00000253794	TSG101,VPS25
GO:0010647	positive regulation of cell communication	11	0.0086	ENSP00000263645,ENSP00000263826,ENSP00000300574,ENSP00000314214,ENSP00000344456,ENSP00000364801,ENSP00000367545,ENSP00000376345,ENSP00000399511,ENSP00000441543,ENSP00000447730	AKT3,CD63,CD81,CRK,CTNNB1,GRB2,HSPA1B,TNIK,TP73,UBC,VAMP2
GO:0023056	positive regulation of signaling	11	0.0086	ENSP00000263645,ENSP00000263826,ENSP00000300574,ENSP00000314214,ENSP00000344456,ENSP00000364801,ENSP00000367545,ENSP00000376345,ENSP00000399511,ENSP00000441543,ENSP00000447730	AKT3,CD63,CD81,CRK,CTNNB1,GRB2,HSPA1B,TNIK,TP73,UBC,VAMP2
GO:0034613	cellular protein localization	10	0.0086	ENSP00000253794,ENSP00000263645,ENSP00000302961,ENSP00000314214,ENSP00000344456,ENSP00000357564,ENSP00000375730,ENSP00000399511,ENSP00000441543,ENSP00000447730	CD63,CD81,CTNNB1,HSPA4,RAB13,RPL13A,TNIK,UBC,VAMP2,VPS25
GO:0042026	protein refolding	2	0.0086	ENSP00000364801,ENSP00000452780	B2M,HSPA1B
GO:0043170	macromolecule metabolic process	27	0.0086	ENSP00000204961,ENSP00000245323,ENSP00000251968,ENSP00000253794,ENSP00000263645,ENSP00000263826,ENSP00000264039,ENSP00000278715,ENSP00000297265,ENSP00000331901,ENSP00000344456,ENSP00000351209,ENSP00000354995,ENSP00000355778,ENSP00000357564,ENSP00000364801,ENSP00000367545,ENSP00000371958,ENSP00000375730,ENSP00000375942,ENSP00000376345,ENSP00000381097,ENSP00000399511,ENSP00000411825,ENSP00000441543…	ABCG1,AKT3,B2M,CD81,CD9,CHMP4C,CPNE3,CTNNB1,EEF1G,EFNB1,EFNB2,EPHA2,EPHB1,GPC1,GRB2,H3F3A,HMBS,HSPA1B,PDCD6IP,RAB13,RPL13A,TBP,TNIK,TP73,TSG101,UBC,VPS25
GO:0051493	regulation of cytoskeleton organization	6	0.0086	ENSP00000297265,ENSP00000300574,ENSP00000344456,ENSP00000364801,ENSP00000376345,ENSP00000411825	CHMP4C,CRK,CTNNB1,GRB2,HSPA1B,PDCD6IP
GO:0060627	regulation of vesicle-mediated transport	6	0.0086	ENSP00000251968,ENSP00000261693,ENSP00000314214,ENSP00000411825,ENSP00000447730,ENSP00000452780	B2M,CD63,PDCD6IP,SCARB1,TSG101,VAMP2
GO:1903543	positive regulation of exosomal secretion	2	0.0086	ENSP00000251968,ENSP00000411825	PDCD6IP,TSG101
GO:0016050	vesicle organization	5	0.009	ENSP00000251968,ENSP00000253794,ENSP00000297265,ENSP00000314214,ENSP00000411825	CHMP4C,PDCD6IP,TSG101,VAMP2,VPS25
GO:0070507	regulation of microtubule cytoskeleton organization	4	0.009	ENSP00000297265,ENSP00000344456,ENSP00000364801,ENSP00000411825	CHMP4C,CTNNB1,HSPA1B,PDCD6IP
GO:0007043	cell-cell junction assembly	3	0.0095	ENSP00000357564,ENSP00000371958,ENSP00000411825	CD9,PDCD6IP,RAB13
GO:0033043	regulation of organelle organization	9	0.0098	ENSP00000251968,ENSP00000297265,ENSP00000300574,ENSP00000344456,ENSP00000355778,ENSP00000364801,ENSP00000367545,ENSP00000376345,ENSP00000411825	CHMP4C,CRK,CTNNB1,GRB2,H3F3A,HSPA1B,PDCD6IP,TP73,TSG101
GO:0044089	positive regulation of cellular component biogenesis	6	0.0098	ENSP00000251968,ENSP00000344456,ENSP00000364801,ENSP00000376345,ENSP00000381097,ENSP00000411825	CTNNB1,EPHB1,GRB2,HSPA1B,PDCD6IP,TSG101
GO:0040017	positive regulation of locomotion	6	0.0102	ENSP00000251968,ENSP00000261693,ENSP00000263826,ENSP00000297265,ENSP00000300574,ENSP00000477590	AKT3,CHMP4C,CPNE3,CRK,SCARB1,TSG101
GO:0045595	regulation of cell differentiation	11	0.0102	ENSP00000245323,ENSP00000264039,ENSP00000300574,ENSP00000344456,ENSP00000354995,ENSP00000355778,ENSP00000364801,ENSP00000367545,ENSP00000381097,ENSP00000399511,ENSP00000452780	ABCG1,B2M,CRK,CTNNB1,EFNB2,EPHB1,GPC1,H3F3A,HSPA1B,TNIK,TP73
GO:0048699	generation of neurons	10	0.0102	ENSP00000204961,ENSP00000245323,ENSP00000264039,ENSP00000344456,ENSP00000357564,ENSP00000367545,ENSP00000376345,ENSP00000381097,ENSP00000399511,ENSP00000452780	B2M,CTNNB1,EFNB1,EFNB2,EPHB1,GPC1,GRB2,RAB13,TNIK,TP73
GO:0070848	response to growth factor	6	0.0104	ENSP00000300574,ENSP00000344456,ENSP00000351209,ENSP00000376345,ENSP00000441543,ENSP00000477590	CPNE3,CRK,CTNNB1,EPHA2,GRB2,UBC
GO:0034375	high-density lipoprotein particle remodeling	2	0.0105	ENSP00000261693,ENSP00000354995	ABCG1,SCARB1
GO:0043410	positive regulation of MAPK cascade	6	0.0105	ENSP00000263645,ENSP00000300574,ENSP00000344456,ENSP00000367545,ENSP00000399511,ENSP00000441543	CD81,CRK,CTNNB1,TNIK,TP73,UBC
GO:0043691	reverse cholesterol transport	2	0.0105	ENSP00000261693,ENSP00000354995	ABCG1,SCARB1
GO:1902188	positive regulation of viral release from host cell	2	0.0105	ENSP00000251968,ENSP00000297265	CHMP4C,TSG101
GO:0000920	septum digestion after cytokinesis	2	0.0111	ENSP00000297265,ENSP00000411825	CHMP4C,PDCD6IP
GO:0032288	myelin assembly	2	0.0111	ENSP00000264039,ENSP00000371958	CD9,GPC1
GO:0071404	cellular response to low-density lipoprotein particle stimulus	2	0.0111	ENSP00000263645,ENSP00000371958	CD81,CD9
GO:0032147	activation of protein kinase activity	5	0.0116	ENSP00000263645,ENSP00000300574,ENSP00000367545,ENSP00000399511,ENSP00000441543	CD81,CRK,TNIK,TP73,UBC
GO:0032940	secretion by cell	8	0.0116	ENSP00000251968,ENSP00000314214,ENSP00000364801,ENSP00000371958,ENSP00000376822,ENSP00000447730,ENSP00000452780,ENSP00000477590	B2M,CD63,CD9,CPNE3,HSPA1B,STEAP3,TSG101,VAMP2
GO:0043162	ubiquitin-dependent protein catabolic process via the multivesicular body sorting pathway	2	0.0118	ENSP00000251968,ENSP00000253794	TSG101,VPS25
GO:0051338	regulation of transferase activity	8	0.0118	ENSP00000251968,ENSP00000253794,ENSP00000263645,ENSP00000300574,ENSP00000344456,ENSP00000367545,ENSP00000399511,ENSP00000441543	CD81,CRK,CTNNB1,TNIK,TP73,TSG101,UBC,VPS25
GO:2001014	regulation of skeletal muscle cell differentiation	2	0.0118	ENSP00000264039,ENSP00000381097	EPHB1,GPC1
GO:0048584	positive regulation of response to stimulus	12	0.0122	ENSP00000261693,ENSP00000263645,ENSP00000263826,ENSP00000300574,ENSP00000344456,ENSP00000364801,ENSP00000367545,ENSP00000376345,ENSP00000399511,ENSP00000441543,ENSP00000447730,ENSP00000452780	AKT3,B2M,CD63,CD81,CRK,CTNNB1,GRB2,HSPA1B,SCARB1,TNIK,TP73,UBC
GO:0002089	lens morphogenesis in camera-type eye	2	0.0124	ENSP00000344456,ENSP00000351209	CTNNB1,EPHA2
GO:1901673	regulation of mitotic spindle assembly	2	0.0124	ENSP00000297265,ENSP00000364801	CHMP4C,HSPA1B
GO:0009967	positive regulation of signal transduction	10	0.0125	ENSP00000263645,ENSP00000263826,ENSP00000300574,ENSP00000344456,ENSP00000364801,ENSP00000367545,ENSP00000376345,ENSP00000399511,ENSP00000441543,ENSP00000447730	AKT3,CD63,CD81,CRK,CTNNB1,GRB2,HSPA1B,TNIK,TP73,UBC
GO:0048468	cell development	10	0.0125	ENSP00000204961,ENSP00000245323,ENSP00000264039,ENSP00000344456,ENSP00000351209,ENSP00000355778,ENSP00000357564,ENSP00000371958,ENSP00000376345,ENSP00000381097	CD9,CTNNB1,EFNB1,EFNB2,EPHA2,EPHB1,GPC1,GRB2,H3F3A,RAB13
GO:0006898	receptor-mediated endocytosis	4	0.0129	ENSP00000261693,ENSP00000263645,ENSP00000371958,ENSP00000376345	CD81,CD9,GRB2,SCARB1
GO:0065003	protein-containing complex assembly	10	0.0134	ENSP00000300574,ENSP00000302961,ENSP00000314214,ENSP00000344456,ENSP00000355778,ENSP00000367545,ENSP00000375942,ENSP00000376345,ENSP00000411825,ENSP00000441543	CRK,CTNNB1,GRB2,H3F3A,HSPA4,PDCD6IP,TBP,TP73,UBC,VAMP2
GO:0050793	regulation of developmental process	13	0.014	ENSP00000245323,ENSP00000263826,ENSP00000264039,ENSP00000300574,ENSP00000344456,ENSP00000351209,ENSP00000354995,ENSP00000355778,ENSP00000364801,ENSP00000367545,ENSP00000381097,ENSP00000399511,ENSP00000452780	ABCG1,AKT3,B2M,CRK,CTNNB1,EFNB2,EPHA2,EPHB1,GPC1,H3F3A,HSPA1B,TNIK,TP73
GO:0006887	exocytosis	7	0.0141	ENSP00000251968,ENSP00000314214,ENSP00000364801,ENSP00000371958,ENSP00000447730,ENSP00000452780,ENSP00000477590	B2M,CD63,CD9,CPNE3,HSPA1B,TSG101,VAMP2
GO:2001234	negative regulation of apoptotic signaling pathway	4	0.0145	ENSP00000344456,ENSP00000364801,ENSP00000473093,ENSP00000477781	CTNNB1,HSPA1B,MAGEA3,TPT1
GO:0001775	cell activation	8	0.0153	ENSP00000314214,ENSP00000344456,ENSP00000364801,ENSP00000371958,ENSP00000381097,ENSP00000447730,ENSP00000452780,ENSP00000477590	B2M,CD63,CD9,CPNE3,CTNNB1,EPHB1,HSPA1B,VAMP2
GO:0045859	regulation of protein kinase activity	7	0.0153	ENSP00000251968,ENSP00000253794,ENSP00000263645,ENSP00000300574,ENSP00000367545,ENSP00000399511,ENSP00000441543	CD81,CRK,TNIK,TP73,TSG101,UBC,VPS25
GO:0033344	cholesterol efflux	2	0.0157	ENSP00000261693,ENSP00000354995	ABCG1,SCARB1
GO:0120036	plasma membrane bounded cell projection organization	8	0.0161	ENSP00000204961,ENSP00000245323,ENSP00000264039,ENSP00000344456,ENSP00000357564,ENSP00000376345,ENSP00000381097,ENSP00000399511	CTNNB1,EFNB1,EFNB2,EPHB1,GPC1,GRB2,RAB13,TNIK
GO:2001233	regulation of apoptotic signaling pathway	5	0.0161	ENSP00000344456,ENSP00000364801,ENSP00000367545,ENSP00000473093,ENSP00000477781	CTNNB1,HSPA1B,MAGEA3,TP73,TPT1
GO:0030100	regulation of endocytosis	4	0.0167	ENSP00000251968,ENSP00000261693,ENSP00000447730,ENSP00000452780	B2M,CD63,SCARB1,TSG101
GO:0050778	positive regulation of immune response	6	0.0172	ENSP00000261693,ENSP00000300574,ENSP00000364801,ENSP00000376345,ENSP00000441543,ENSP00000452780	B2M,CRK,GRB2,HSPA1B,SCARB1,UBC
GO:0043534	blood vessel endothelial cell migration	2	0.0177	ENSP00000245323,ENSP00000261693	EFNB2,SCARB1
GO:2000026	regulation of multicellular organismal development	11	0.0177	ENSP00000245323,ENSP00000263826,ENSP00000264039,ENSP00000344456,ENSP00000351209,ENSP00000355778,ENSP00000364801,ENSP00000367545,ENSP00000381097,ENSP00000399511,ENSP00000452780	AKT3,B2M,CTNNB1,EFNB2,EPHA2,EPHB1,GPC1,H3F3A,HSPA1B,TNIK,TP73
GO:0051716	cellular response to stimulus	23	0.0182	ENSP00000204961,ENSP00000245323,ENSP00000261693,ENSP00000263645,ENSP00000263735,ENSP00000263826,ENSP00000300574,ENSP00000314214,ENSP00000344456,ENSP00000351209,ENSP00000354995,ENSP00000357564,ENSP00000364801,ENSP00000367545,ENSP00000371958,ENSP00000375730,ENSP00000376345,ENSP00000381097,ENSP00000399511,ENSP00000441543,ENSP00000447730,ENSP00000452780,ENSP00000477590	ABCG1,AKT3,B2M,CD63,CD81,CD9,CPNE3,CRK,CTNNB1,EFNB1,EFNB2,EPCAM,EPHA2,EPHB1,GRB2,HSPA1B,RAB13,RPL13A,SCARB1,TNIK,TP73,UBC,VAMP2
GO:0034401	chromatin organization involved in regulation of transcription	3	0.0184	ENSP00000344456,ENSP00000355778,ENSP00000475814	CTNNB1,H3F3A,HIST2H2AA3
GO:0007399	nervous system development	12	0.0185	ENSP00000204961,ENSP00000245323,ENSP00000263826,ENSP00000264039,ENSP00000344456,ENSP00000357564,ENSP00000367545,ENSP00000371958,ENSP00000376345,ENSP00000381097,ENSP00000399511,ENSP00000452780	AKT3,B2M,CD9,CTNNB1,EFNB1,EFNB2,EPHB1,GPC1,GRB2,RAB13,TNIK,TP73
GO:0048593	camera-type eye morphogenesis	3	0.0185	ENSP00000344456,ENSP00000351209,ENSP00000381097	CTNNB1,EPHA2,EPHB1
GO:0048643	positive regulation of skeletal muscle tissue development	2	0.0185	ENSP00000264039,ENSP00000344456	CTNNB1,GPC1
GO:0072657	protein localization to membrane	5	0.0185	ENSP00000302961,ENSP00000314214,ENSP00000357564,ENSP00000375730,ENSP00000399511	HSPA4,RAB13,RPL13A,TNIK,VAMP2
GO:0048646	anatomical structure formation involved in morphogenesis	7	0.0186	ENSP00000245323,ENSP00000264039,ENSP00000344456,ENSP00000351209,ENSP00000371958,ENSP00000376345,ENSP00000381097	CD9,CTNNB1,EFNB2,EPHA2,EPHB1,GPC1,GRB2
GO:0098657	import into cell	6	0.0187	ENSP00000261693,ENSP00000263645,ENSP00000300574,ENSP00000371958,ENSP00000376345,ENSP00000376822	CD81,CD9,CRK,GRB2,SCARB1,STEAP3
GO:1903706	regulation of hemopoiesis	5	0.0188	ENSP00000344456,ENSP00000355778,ENSP00000364801,ENSP00000367545,ENSP00000452780	B2M,CTNNB1,H3F3A,HSPA1B,TP73
GO:0030163	protein catabolic process	6	0.0193	ENSP00000251968,ENSP00000253794,ENSP00000264039,ENSP00000297265,ENSP00000411825,ENSP00000441543	CHMP4C,GPC1,PDCD6IP,TSG101,UBC,VPS25
GO:0071375	cellular response to peptide hormone stimulus	4	0.0193	ENSP00000300574,ENSP00000314214,ENSP00000357564,ENSP00000376345	CRK,GRB2,RAB13,VAMP2
GO:0009719	response to endogenous stimulus	9	0.0196	ENSP00000263645,ENSP00000300574,ENSP00000314214,ENSP00000344456,ENSP00000354995,ENSP00000357564,ENSP00000371958,ENSP00000376345,ENSP00000441543	ABCG1,CD81,CD9,CRK,CTNNB1,GRB2,RAB13,UBC,VAMP2
GO:0018193	peptidyl-amino acid modification	7	0.0196	ENSP00000204961,ENSP00000245323,ENSP00000263826,ENSP00000278715,ENSP00000351209,ENSP00000376345,ENSP00000381097	AKT3,EFNB1,EFNB2,EPHA2,EPHB1,GRB2,HMBS
GO:0040036	regulation of fibroblast growth factor receptor signaling pathway	2	0.0196	ENSP00000264039,ENSP00000344456	CTNNB1,GPC1
GO:0007034	vacuolar transport	3	0.0199	ENSP00000251968,ENSP00000253794,ENSP00000297265	CHMP4C,TSG101,VPS25
GO:0010941	regulation of cell death	10	0.0199	ENSP00000245323,ENSP00000344456,ENSP00000364801,ENSP00000367545,ENSP00000376822,ENSP00000381097,ENSP00000399511,ENSP00000441543,ENSP00000473093,ENSP00000477781	CTNNB1,EFNB2,EPHB1,HSPA1B,MAGEA3,STEAP3,TNIK,TP73,TPT1,UBC
GO:0030155	regulation of cell adhesion	6	0.0199	ENSP00000204961,ENSP00000263735,ENSP00000300574,ENSP00000351209,ENSP00000371958,ENSP00000376345	CD9,CRK,EFNB1,EPCAM,EPHA2,GRB2
GO:0045637	regulation of myeloid cell differentiation	4	0.0199	ENSP00000344456,ENSP00000355778,ENSP00000364801,ENSP00000452780	B2M,CTNNB1,H3F3A,HSPA1B
GO:0030866	cortical actin cytoskeleton organization	2	0.0201	ENSP00000357564,ENSP00000411825	PDCD6IP,RAB13
GO:0040029	regulation of gene expression, epigenetic	4	0.0201	ENSP00000344456,ENSP00000355778,ENSP00000375942,ENSP00000475814	CTNNB1,H3F3A,HIST2H2AA3,TBP
GO:0043254	regulation of protein complex assembly	5	0.0203	ENSP00000344456,ENSP00000355778,ENSP00000364801,ENSP00000375730,ENSP00000376345	CTNNB1,GRB2,H3F3A,HSPA1B,RPL13A
GO:0051347	positive regulation of transferase activity	6	0.0206	ENSP00000263645,ENSP00000300574,ENSP00000344456,ENSP00000367545,ENSP00000399511,ENSP00000441543	CD81,CRK,CTNNB1,TNIK,TP73,UBC
GO:0090287	regulation of cellular response to growth factor stimulus	4	0.0206	ENSP00000264039,ENSP00000344456,ENSP00000441543,ENSP00000447730	CD63,CTNNB1,GPC1,UBC
GO:0038128	ERBB2 signaling pathway	2	0.021	ENSP00000376345,ENSP00000477590	CPNE3,GRB2
GO:0048713	regulation of oligodendrocyte differentiation	2	0.0222	ENSP00000344456,ENSP00000367545	CTNNB1,TP73
GO:0050768	negative regulation of neurogenesis	4	0.0222	ENSP00000245323,ENSP00000344456,ENSP00000367545,ENSP00000452780	B2M,CTNNB1,EFNB2,TP73
GO:0070830	bicellular tight junction assembly	2	0.0222	ENSP00000357564,ENSP00000411825	PDCD6IP,RAB13
GO:0050776	regulation of immune response	7	0.0223	ENSP00000261693,ENSP00000263645,ENSP00000300574,ENSP00000364801,ENSP00000376345,ENSP00000441543,ENSP00000452780	B2M,CD81,CRK,GRB2,HSPA1B,SCARB1,UBC
GO:0008152	metabolic process	30	0.0234	ENSP00000204961,ENSP00000245323,ENSP00000251968,ENSP00000253794,ENSP00000261693,ENSP00000263645,ENSP00000263826,ENSP00000264039,ENSP00000278715,ENSP00000297265,ENSP00000331901,ENSP00000344456,ENSP00000351209,ENSP00000354995,ENSP00000355778,ENSP00000357564,ENSP00000359380,ENSP00000364801,ENSP00000367545,ENSP00000371958,ENSP00000375730,ENSP00000375942,ENSP00000376345,ENSP00000376822,ENSP00000381097…	ABCG1,AKT3,B2M,CD81,CD9,CHMP4C,CPNE3,CTNNB1,EEF1G,EFNB1,EFNB2,EPHA2,EPHB1,GPC1,GRB2,H3F3A,HMBS,HSPA1B,PDCD6IP,RAB13,RPL13A,SCARB1,SCD,STEAP3,TBP,TNIK,TP73,TSG101,UBC,VPS25
GO:0051270	regulation of cellular component movement	7	0.0237	ENSP00000261693,ENSP00000263645,ENSP00000263826,ENSP00000300574,ENSP00000351209,ENSP00000371958,ENSP00000477590	AKT3,CD81,CD9,CPNE3,CRK,EPHA2,SCARB1
GO:0051050	positive regulation of transport	7	0.0245	ENSP00000251968,ENSP00000314214,ENSP00000354995,ENSP00000367545,ENSP00000411825,ENSP00000447730,ENSP00000452780	ABCG1,B2M,CD63,PDCD6IP,TP73,TSG101,VAMP2
GO:0065009	regulation of molecular function	15	0.0245	ENSP00000251968,ENSP00000253794,ENSP00000261693,ENSP00000263645,ENSP00000300574,ENSP00000314214,ENSP00000344456,ENSP00000351209,ENSP00000364801,ENSP00000367545,ENSP00000376345,ENSP00000399511,ENSP00000441543,ENSP00000452780,ENSP00000473093	B2M,CD81,CRK,CTNNB1,EPHA2,GRB2,HSPA1B,MAGEA3,SCARB1,TNIK,TP73,TSG101,UBC,VAMP2,VPS25
GO:0045321	leukocyte activation	7	0.0246	ENSP00000314214,ENSP00000344456,ENSP00000364801,ENSP00000381097,ENSP00000447730,ENSP00000452780,ENSP00000477590	B2M,CD63,CPNE3,CTNNB1,EPHB1,HSPA1B,VAMP2
GO:0045807	positive regulation of endocytosis	3	0.0248	ENSP00000251968,ENSP00000447730,ENSP00000452780	B2M,CD63,TSG101
GO:1901701	cellular response to oxygen-containing compound	7	0.0248	ENSP00000261693,ENSP00000300574,ENSP00000314214,ENSP00000344456,ENSP00000357564,ENSP00000376345,ENSP00000452780	B2M,CRK,CTNNB1,GRB2,RAB13,SCARB1,VAMP2
GO:2000648	positive regulation of stem cell proliferation	2	0.0248	ENSP00000263735,ENSP00000344456	CTNNB1,EPCAM
GO:0044093	positive regulation of molecular function	10	0.0249	ENSP00000261693,ENSP00000263645,ENSP00000300574,ENSP00000344456,ENSP00000351209,ENSP00000364801,ENSP00000367545,ENSP00000399511,ENSP00000441543,ENSP00000452780	B2M,CD81,CRK,CTNNB1,EPHA2,HSPA1B,SCARB1,TNIK,TP73,UBC
GO:0071704	organic substance metabolic process	29	0.0249	ENSP00000204961,ENSP00000245323,ENSP00000251968,ENSP00000253794,ENSP00000261693,ENSP00000263645,ENSP00000263826,ENSP00000264039,ENSP00000278715,ENSP00000297265,ENSP00000331901,ENSP00000344456,ENSP00000351209,ENSP00000354995,ENSP00000355778,ENSP00000357564,ENSP00000359380,ENSP00000364801,ENSP00000367545,ENSP00000371958,ENSP00000375730,ENSP00000375942,ENSP00000376345,ENSP00000381097,ENSP00000399511…	ABCG1,AKT3,B2M,CD81,CD9,CHMP4C,CPNE3,CTNNB1,EEF1G,EFNB1,EFNB2,EPHA2,EPHB1,GPC1,GRB2,H3F3A,HMBS,HSPA1B,PDCD6IP,RAB13,RPL13A,SCARB1,SCD,TBP,TNIK,TP73,TSG101,UBC,VPS25
GO:0009987	cellular process	39	0.025	ENSP00000204961,ENSP00000245323,ENSP00000251968,ENSP00000253794,ENSP00000261693,ENSP00000263645,ENSP00000263735,ENSP00000263826,ENSP00000264039,ENSP00000278715,ENSP00000297265,ENSP00000300574,ENSP00000302961,ENSP00000314214,ENSP00000331901,ENSP00000344456,ENSP00000351209,ENSP00000354995,ENSP00000355778,ENSP00000357564,ENSP00000359380,ENSP00000364801,ENSP00000367545,ENSP00000367623,ENSP00000369674…	ABCG1,AKT3,B2M,BCL7C,CD63,CD81,CD9,CHMP4C,CPNE3,CRK,CTNNB1,EEF1G,EFNB1,EFNB2,EPCAM,EPHA2,EPHB1,GPC1,GRB2,H3F3A,HIST2H2AA3,HMBS,HSPA14,HSPA1B,HSPA4,PDCD6IP,RAB13,RPL13A,SCARB1,SCD,STEAP3,TBP,TNIK,TP73,TPT1,TSG101,UBC,VAMP2,VPS25
GO:0008285	negative regulation of cell population proliferation	6	0.0254	ENSP00000251968,ENSP00000344456,ENSP00000364801,ENSP00000367545,ENSP00000371958,ENSP00000381097	CD9,CTNNB1,EPHB1,HSPA1B,TP73,TSG101
GO:0016236	macroautophagy	3	0.0256	ENSP00000251968,ENSP00000253794,ENSP00000297265	CHMP4C,TSG101,VPS25
GO:0051093	negative regulation of developmental process	7	0.026	ENSP00000245323,ENSP00000263826,ENSP00000344456,ENSP00000354995,ENSP00000367545,ENSP00000381097,ENSP00000452780	ABCG1,AKT3,B2M,CTNNB1,EFNB2,EPHB1,TP73
GO:0070887	cellular response to chemical stimulus	13	0.026	ENSP00000261693,ENSP00000300574,ENSP00000314214,ENSP00000344456,ENSP00000351209,ENSP00000357564,ENSP00000364801,ENSP00000375730,ENSP00000376345,ENSP00000381097,ENSP00000441543,ENSP00000452780,ENSP00000477590	B2M,CPNE3,CRK,CTNNB1,EPHA2,EPHB1,GRB2,HSPA1B,RAB13,RPL13A,SCARB1,UBC,VAMP2
GO:0008283	cell population proliferation	6	0.0262	ENSP00000261693,ENSP00000263645,ENSP00000344456,ENSP00000351209,ENSP00000355778,ENSP00000381097	CD81,CTNNB1,EPHA2,EPHB1,H3F3A,SCARB1
GO:1903827	regulation of cellular protein localization	5	0.0264	ENSP00000251968,ENSP00000314214,ENSP00000344456,ENSP00000351209,ENSP00000367545	CTNNB1,EPHA2,TP73,TSG101,VAMP2
GO:0045834	positive regulation of lipid metabolic process	3	0.0266	ENSP00000261693,ENSP00000263645,ENSP00000354995	ABCG1,CD81,SCARB1
GO:0045596	negative regulation of cell differentiation	6	0.0271	ENSP00000245323,ENSP00000344456,ENSP00000354995,ENSP00000367545,ENSP00000381097,ENSP00000452780	ABCG1,B2M,CTNNB1,EFNB2,EPHB1,TP73
GO:0030316	osteoclast differentiation	2	0.0273	ENSP00000344456,ENSP00000351209	CTNNB1,EPHA2
GO:0002252	immune effector process	7	0.0279	ENSP00000300574,ENSP00000314214,ENSP00000364801,ENSP00000376345,ENSP00000447730,ENSP00000452780,ENSP00000477590	B2M,CD63,CPNE3,CRK,GRB2,HSPA1B,VAMP2
GO:1903829	positive regulation of cellular protein localization	4	0.0279	ENSP00000251968,ENSP00000314214,ENSP00000351209,ENSP00000367545	EPHA2,TP73,TSG101,VAMP2
GO:1901214	regulation of neuron death	4	0.0281	ENSP00000245323,ENSP00000344456,ENSP00000367545,ENSP00000381097	CTNNB1,EFNB2,EPHB1,TP73
GO:0006796	phosphate-containing compound metabolic process	11	0.0282	ENSP00000204961,ENSP00000245323,ENSP00000263826,ENSP00000351209,ENSP00000359380,ENSP00000364801,ENSP00000376345,ENSP00000381097,ENSP00000399511,ENSP00000441543,ENSP00000477590	AKT3,CPNE3,EFNB1,EFNB2,EPHA2,EPHB1,GRB2,HSPA1B,SCD,TNIK,UBC
GO:0045055	regulated exocytosis	6	0.0282	ENSP00000314214,ENSP00000364801,ENSP00000371958,ENSP00000447730,ENSP00000452780,ENSP00000477590	B2M,CD63,CD9,CPNE3,HSPA1B,VAMP2
GO:0071363	cellular response to growth factor stimulus	5	0.0282	ENSP00000300574,ENSP00000344456,ENSP00000376345,ENSP00000441543,ENSP00000477590	CPNE3,CRK,CTNNB1,GRB2,UBC
GO:0072512	trivalent inorganic cation transport	2	0.0282	ENSP00000376822,ENSP00000452780	B2M,STEAP3
GO:0010824	regulation of centrosome duplication	2	0.0291	ENSP00000297265,ENSP00000411825	CHMP4C,PDCD6IP
GO:0046849	bone remodeling	2	0.0291	ENSP00000344456,ENSP00000351209	CTNNB1,EPHA2
GO:0001525	angiogenesis	4	0.0298	ENSP00000245323,ENSP00000344456,ENSP00000351209,ENSP00000381097	CTNNB1,EFNB2,EPHA2,EPHB1
GO:0044237	cellular metabolic process	28	0.0298	ENSP00000204961,ENSP00000245323,ENSP00000251968,ENSP00000253794,ENSP00000261693,ENSP00000263645,ENSP00000263826,ENSP00000264039,ENSP00000278715,ENSP00000297265,ENSP00000331901,ENSP00000344456,ENSP00000351209,ENSP00000355778,ENSP00000357564,ENSP00000359380,ENSP00000364801,ENSP00000367545,ENSP00000371958,ENSP00000375730,ENSP00000375942,ENSP00000376345,ENSP00000381097,ENSP00000399511,ENSP00000411825…	AKT3,B2M,CD81,CD9,CHMP4C,CPNE3,CTNNB1,EEF1G,EFNB1,EFNB2,EPHA2,EPHB1,GPC1,GRB2,H3F3A,HMBS,HSPA1B,PDCD6IP,RAB13,RPL13A,SCARB1,SCD,TBP,TNIK,TP73,TSG101,UBC,VPS25
GO:0071417	cellular response to organonitrogen compound	5	0.0298	ENSP00000300574,ENSP00000314214,ENSP00000344456,ENSP00000357564,ENSP00000376345	CRK,CTNNB1,GRB2,RAB13,VAMP2
GO:0045540	regulation of cholesterol biosynthetic process	2	0.0307	ENSP00000354995,ENSP00000359380	ABCG1,SCD
GO:0072665	protein localization to vacuole	2	0.0307	ENSP00000253794,ENSP00000263645	CD81,VPS25
GO:0000187	activation of MAPK activity	3	0.0316	ENSP00000263645,ENSP00000367545,ENSP00000441543	CD81,TP73,UBC
GO:0010594	regulation of endothelial cell migration	3	0.0321	ENSP00000261693,ENSP00000263826,ENSP00000351209	AKT3,EPHA2,SCARB1
GO:0033077	T cell differentiation in thymus	2	0.0327	ENSP00000344456,ENSP00000452780	B2M,CTNNB1
GO:0036230	granulocyte activation	5	0.0327	ENSP00000314214,ENSP00000364801,ENSP00000447730,ENSP00000452780,ENSP00000477590	B2M,CD63,CPNE3,HSPA1B,VAMP2
GO:0006996	organelle organization	14	0.0329	ENSP00000251968,ENSP00000253794,ENSP00000263826,ENSP00000297265,ENSP00000302961,ENSP00000314214,ENSP00000344456,ENSP00000355778,ENSP00000357564,ENSP00000367545,ENSP00000399511,ENSP00000411825,ENSP00000441543,ENSP00000475814	AKT3,CHMP4C,CTNNB1,H3F3A,HIST2H2AA3,HSPA4,PDCD6IP,RAB13,TNIK,TP73,TSG101,UBC,VAMP2,VPS25
GO:0051239	regulation of multicellular organismal process	13	0.033	ENSP00000245323,ENSP00000261693,ENSP00000263826,ENSP00000264039,ENSP00000344456,ENSP00000351209,ENSP00000355778,ENSP00000364801,ENSP00000367545,ENSP00000371958,ENSP00000381097,ENSP00000399511,ENSP00000452780	AKT3,B2M,CD9,CTNNB1,EFNB2,EPHA2,EPHB1,GPC1,H3F3A,HSPA1B,SCARB1,TNIK,TP73
GO:0032869	cellular response to insulin stimulus	3	0.0333	ENSP00000314214,ENSP00000357564,ENSP00000376345	GRB2,RAB13,VAMP2
GO:0043299	leukocyte degranulation	5	0.0333	ENSP00000314214,ENSP00000364801,ENSP00000447730,ENSP00000452780,ENSP00000477590	B2M,CD63,CPNE3,HSPA1B,VAMP2
GO:0045843	negative regulation of striated muscle tissue development	2	0.0333	ENSP00000367545,ENSP00000381097	EPHB1,TP73
GO:0050865	regulation of cell activation	5	0.0333	ENSP00000204961,ENSP00000263645,ENSP00000344456,ENSP00000371958,ENSP00000376345	CD81,CD9,CTNNB1,EFNB1,GRB2
GO:0061024	membrane organization	6	0.0333	ENSP00000302961,ENSP00000314214,ENSP00000367545,ENSP00000371958,ENSP00000376345,ENSP00000441543	CD9,GRB2,HSPA4,TP73,UBC,VAMP2
GO:0010001	glial cell differentiation	3	0.0334	ENSP00000264039,ENSP00000344456,ENSP00000371958	CD9,CTNNB1,GPC1
GO:0006897	endocytosis	5	0.0339	ENSP00000261693,ENSP00000263645,ENSP00000300574,ENSP00000371958,ENSP00000376345	CD81,CD9,CRK,GRB2,SCARB1
GO:0046661	male sex differentiation	3	0.0339	ENSP00000344456,ENSP00000355778,ENSP00000357564	CTNNB1,H3F3A,RAB13
GO:0021545	cranial nerve development	2	0.0341	ENSP00000344456,ENSP00000381097	CTNNB1,EPHB1
GO:0045646	regulation of erythrocyte differentiation	2	0.0341	ENSP00000364801,ENSP00000452780	B2M,HSPA1B
GO:0072659	protein localization to plasma membrane	3	0.0341	ENSP00000314214,ENSP00000357564,ENSP00000399511	RAB13,TNIK,VAMP2
GO:0002275	myeloid cell activation involved in immune response	5	0.0352	ENSP00000314214,ENSP00000364801,ENSP00000447730,ENSP00000452780,ENSP00000477590	B2M,CD63,CPNE3,HSPA1B,VAMP2
GO:0002444	myeloid leukocyte mediated immunity	5	0.0352	ENSP00000314214,ENSP00000364801,ENSP00000447730,ENSP00000452780,ENSP00000477590	B2M,CD63,CPNE3,HSPA1B,VAMP2
GO:0051240	positive regulation of multicellular organismal process	9	0.0352	ENSP00000245323,ENSP00000261693,ENSP00000263826,ENSP00000264039,ENSP00000344456,ENSP00000364801,ENSP00000367545,ENSP00000381097,ENSP00000452780	AKT3,B2M,CTNNB1,EFNB2,EPHB1,GPC1,HSPA1B,SCARB1,TP73
GO:0061138	morphogenesis of a branching epithelium	3	0.0353	ENSP00000344456,ENSP00000351209,ENSP00000376345	CTNNB1,EPHA2,GRB2
GO:0031589	cell-substrate adhesion	3	0.0364	ENSP00000344456,ENSP00000381097,ENSP00000447730	CD63,CTNNB1,EPHB1
GO:0032269	negative regulation of cellular protein metabolic process	7	0.0382	ENSP00000251968,ENSP00000253794,ENSP00000344456,ENSP00000364801,ENSP00000367545,ENSP00000375730,ENSP00000473093	CTNNB1,HSPA1B,MAGEA3,RPL13A,TP73,TSG101,VPS25
GO:0048260	positive regulation of receptor-mediated endocytosis	2	0.0382	ENSP00000447730,ENSP00000452780	B2M,CD63
GO:0051094	positive regulation of developmental process	8	0.0382	ENSP00000245323,ENSP00000263826,ENSP00000264039,ENSP00000300574,ENSP00000344456,ENSP00000364801,ENSP00000367545,ENSP00000381097	AKT3,CRK,CTNNB1,EFNB2,EPHB1,GPC1,HSPA1B,TP73
GO:0051603	proteolysis involved in cellular protein catabolic process	5	0.0382	ENSP00000251968,ENSP00000253794,ENSP00000297265,ENSP00000411825,ENSP00000441543	CHMP4C,PDCD6IP,TSG101,UBC,VPS25
GO:0002757	immune response-activating signal transduction	4	0.0386	ENSP00000261693,ENSP00000300574,ENSP00000376345,ENSP00000441543	CRK,GRB2,SCARB1,UBC
GO:0045815	positive regulation of gene expression, epigenetic	2	0.039	ENSP00000344456,ENSP00000375942	CTNNB1,TBP
GO:0023052	signaling	19	0.0391	ENSP00000204961,ENSP00000245323,ENSP00000261693,ENSP00000263645,ENSP00000263735,ENSP00000263826,ENSP00000300574,ENSP00000314214,ENSP00000344456,ENSP00000351209,ENSP00000357564,ENSP00000367545,ENSP00000371958,ENSP00000376345,ENSP00000381097,ENSP00000399511,ENSP00000441543,ENSP00000452780,ENSP00000477590	AKT3,B2M,CD81,CD9,CPNE3,CRK,CTNNB1,EFNB1,EFNB2,EPCAM,EPHA2,EPHB1,GRB2,RAB13,SCARB1,TNIK,TP73,UBC,VAMP2
GO:0000186	activation of MAPKK activity	2	0.0399	ENSP00000300574,ENSP00000399511	CRK,TNIK
GO:0017157	regulation of exocytosis	3	0.0399	ENSP00000251968,ENSP00000314214,ENSP00000411825	PDCD6IP,TSG101,VAMP2
GO:0031295	T cell costimulation	2	0.0399	ENSP00000204961,ENSP00000376345	EFNB1,GRB2
GO:0046328	regulation of JNK cascade	3	0.0399	ENSP00000367545,ENSP00000381097,ENSP00000399511	EPHB1,TNIK,TP73
GO:0007165	signal transduction	18	0.0405	ENSP00000204961,ENSP00000245323,ENSP00000261693,ENSP00000263645,ENSP00000263735,ENSP00000263826,ENSP00000300574,ENSP00000344456,ENSP00000351209,ENSP00000357564,ENSP00000367545,ENSP00000371958,ENSP00000376345,ENSP00000381097,ENSP00000399511,ENSP00000441543,ENSP00000452780,ENSP00000477590	AKT3,B2M,CD81,CD9,CPNE3,CRK,CTNNB1,EFNB1,EFNB2,EPCAM,EPHA2,EPHB1,GRB2,RAB13,SCARB1,TNIK,TP73,UBC
GO:0046890	regulation of lipid biosynthetic process	3	0.042	ENSP00000261693,ENSP00000354995,ENSP00000359380	ABCG1,SCARB1,SCD
GO:1901575	organic substance catabolic process	9	0.042	ENSP00000251968,ENSP00000253794,ENSP00000261693,ENSP00000264039,ENSP00000297265,ENSP00000364801,ENSP00000375730,ENSP00000411825,ENSP00000441543	CHMP4C,GPC1,HSPA1B,PDCD6IP,RPL13A,SCARB1,TSG101,UBC,VPS25
GO:0010638	positive regulation of organelle organization	5	0.0422	ENSP00000344456,ENSP00000364801,ENSP00000367545,ENSP00000376345,ENSP00000411825	CTNNB1,GRB2,HSPA1B,PDCD6IP,TP73
GO:0080090	regulation of primary metabolic process	21	0.0427	ENSP00000251968,ENSP00000253794,ENSP00000261693,ENSP00000263645,ENSP00000263735,ENSP00000300574,ENSP00000344456,ENSP00000351209,ENSP00000354995,ENSP00000355778,ENSP00000359380,ENSP00000364801,ENSP00000367545,ENSP00000375730,ENSP00000375942,ENSP00000376345,ENSP00000381097,ENSP00000399511,ENSP00000441543,ENSP00000473093,ENSP00000475814	ABCG1,CD81,CRK,CTNNB1,EPCAM,EPHA2,EPHB1,GRB2,H3F3A,HIST2H2AA3,HSPA1B,MAGEA3,RPL13A,SCARB1,SCD,TBP,TNIK,TP73,TSG101,UBC,VPS25
GO:0050790	regulation of catalytic activity	11	0.0431	ENSP00000251968,ENSP00000253794,ENSP00000261693,ENSP00000263645,ENSP00000300574,ENSP00000344456,ENSP00000351209,ENSP00000367545,ENSP00000399511,ENSP00000441543,ENSP00000473093	CD81,CRK,CTNNB1,EPHA2,MAGEA3,SCARB1,TNIK,TP73,TSG101,UBC,VPS25
GO:0009893	positive regulation of metabolic process	14	0.0433	ENSP00000251968,ENSP00000261693,ENSP00000263645,ENSP00000263735,ENSP00000300574,ENSP00000344456,ENSP00000354995,ENSP00000364801,ENSP00000367545,ENSP00000375942,ENSP00000376345,ENSP00000399511,ENSP00000441543,ENSP00000447730	ABCG1,CD63,CD81,CRK,CTNNB1,EPCAM,GRB2,HSPA1B,SCARB1,TBP,TNIK,TP73,TSG101,UBC
GO:0048513	animal organ development	13	0.0433	ENSP00000204961,ENSP00000251968,ENSP00000263735,ENSP00000263826,ENSP00000344456,ENSP00000351209,ENSP00000355778,ENSP00000357564,ENSP00000367545,ENSP00000371958,ENSP00000376345,ENSP00000381097,ENSP00000452780	AKT3,B2M,CD9,CTNNB1,EFNB1,EPCAM,EPHA2,EPHB1,GRB2,H3F3A,RAB13,TP73,TSG101
GO:0002064	epithelial cell development	3	0.0441	ENSP00000344456,ENSP00000351209,ENSP00000357564	CTNNB1,EPHA2,RAB13
GO:0060326	cell chemotaxis	3	0.0461	ENSP00000351209,ENSP00000357564,ENSP00000381097	EPHA2,EPHB1,RAB13
GO:2000145	regulation of cell motility	6	0.0461	ENSP00000261693,ENSP00000263645,ENSP00000263826,ENSP00000300574,ENSP00000351209,ENSP00000477590	AKT3,CD81,CPNE3,CRK,EPHA2,SCARB1
GO:0007154	cell communication	19	0.0464	ENSP00000204961,ENSP00000245323,ENSP00000261693,ENSP00000263645,ENSP00000263735,ENSP00000263826,ENSP00000300574,ENSP00000314214,ENSP00000344456,ENSP00000351209,ENSP00000357564,ENSP00000367545,ENSP00000371958,ENSP00000376345,ENSP00000381097,ENSP00000399511,ENSP00000441543,ENSP00000452780,ENSP00000477590	AKT3,B2M,CD81,CD9,CPNE3,CRK,CTNNB1,EFNB1,EFNB2,EPCAM,EPHA2,EPHB1,GRB2,RAB13,SCARB1,TNIK,TP73,UBC,VAMP2
GO:0007267	cell-cell signaling	7	0.0468	ENSP00000204961,ENSP00000245323,ENSP00000314214,ENSP00000344456,ENSP00000376345,ENSP00000399511,ENSP00000441543	CTNNB1,EFNB1,EFNB2,GRB2,TNIK,UBC,VAMP2
GO:0010959	regulation of metal ion transport	4	0.0468	ENSP00000314214,ENSP00000344456,ENSP00000447730,ENSP00000452780	B2M,CD63,CTNNB1,VAMP2
GO:0006909	phagocytosis	3	0.047	ENSP00000261693,ENSP00000300574,ENSP00000376345	CRK,GRB2,SCARB1
GO:0045088	regulation of innate immune response	4	0.047	ENSP00000261693,ENSP00000300574,ENSP00000364801,ENSP00000441543	CRK,HSPA1B,SCARB1,UBC
GO:0051960	regulation of nervous system development	6	0.047	ENSP00000245323,ENSP00000344456,ENSP00000367545,ENSP00000381097,ENSP00000399511,ENSP00000452780	B2M,CTNNB1,EFNB2,EPHB1,TNIK,TP73
GO:0071241	cellular response to inorganic substance	3	0.047	ENSP00000300574,ENSP00000452780,ENSP00000477590	B2M,CPNE3,CRK
GO:1901264	carbohydrate derivative transport	2	0.047	ENSP00000261693,ENSP00000354995	ABCG1,SCARB1
GO:0001910	regulation of leukocyte mediated cytotoxicity	2	0.0473	ENSP00000300574,ENSP00000452780	B2M,CRK
GO:0022407	regulation of cell-cell adhesion	4	0.0478	ENSP00000204961,ENSP00000263735,ENSP00000371958,ENSP00000376345	CD9,EFNB1,EPCAM,GRB2
GO:0010629	negative regulation of gene expression	9	0.0485	ENSP00000251968,ENSP00000344456,ENSP00000355778,ENSP00000364801,ENSP00000367545,ENSP00000375730,ENSP00000441543,ENSP00000473093,ENSP00000475814	CTNNB1,H3F3A,HIST2H2AA3,HSPA1B,MAGEA3,RPL13A,TP73,TSG101,UBC
GO:0031323	regulation of cellular metabolic process	21	0.0486	ENSP00000251968,ENSP00000253794,ENSP00000261693,ENSP00000263645,ENSP00000263735,ENSP00000300574,ENSP00000344456,ENSP00000351209,ENSP00000354995,ENSP00000355778,ENSP00000364801,ENSP00000367545,ENSP00000375730,ENSP00000375942,ENSP00000376345,ENSP00000381097,ENSP00000399511,ENSP00000441543,ENSP00000447730,ENSP00000473093,ENSP00000475814	ABCG1,CD63,CD81,CRK,CTNNB1,EPCAM,EPHA2,EPHB1,GRB2,H3F3A,HIST2H2AA3,HSPA1B,MAGEA3,RPL13A,SCARB1,TBP,TNIK,TP73,TSG101,UBC,VPS25
GO:0032870	cellular response to hormone stimulus	5	0.049	ENSP00000300574,ENSP00000314214,ENSP00000344456,ENSP00000357564,ENSP00000376345	CRK,CTNNB1,GRB2,RAB13,VAMP2
GO:0019222	regulation of metabolic process	22	0.0494	ENSP00000251968,ENSP00000253794,ENSP00000261693,ENSP00000263645,ENSP00000263735,ENSP00000300574,ENSP00000344456,ENSP00000351209,ENSP00000354995,ENSP00000355778,ENSP00000359380,ENSP00000364801,ENSP00000367545,ENSP00000375730,ENSP00000375942,ENSP00000376345,ENSP00000381097,ENSP00000399511,ENSP00000441543,ENSP00000447730,ENSP00000473093,ENSP00000475814	ABCG1,CD63,CD81,CRK,CTNNB1,EPCAM,EPHA2,EPHB1,GRB2,H3F3A,HIST2H2AA3,HSPA1B,MAGEA3,RPL13A,SCARB1,SCD,TBP,TNIK,TP73,TSG101,UBC,VPS25
GO:0043085	positive regulation of catalytic activity	8	0.0498	ENSP00000261693,ENSP00000263645,ENSP00000300574,ENSP00000344456,ENSP00000351209,ENSP00000367545,ENSP00000399511,ENSP00000441543	CD81,CRK,CTNNB1,EPHA2,SCARB1,TNIK,TP73,UBC
GO:0019216	regulation of lipid metabolic process	4	0.0499	ENSP00000261693,ENSP00000263645,ENSP00000354995,ENSP00000359380	ABCG1,CD81,SCARB1,SCD

## Sheet: Exosome molecular function
#pathway ID	pathway description	observed gene count	false discovery rate	matching proteins in your network (IDs)	matching proteins in your network (labels)
GO:0001618	virus receptor activity	5	0.00017	ENSP00000245323,ENSP00000261693,ENSP00000263645,ENSP00000351209,ENSP00000364801	CD81,EFNB2,EPHA2,HSPA1B,SCARB1
GO:0046875	ephrin receptor binding	4	0.00017	ENSP00000204961,ENSP00000245323,ENSP00000300574,ENSP00000376345	CRK,EFNB1,EFNB2,GRB2
GO:0048306	calcium-dependent protein binding	4	0.00071	ENSP00000251968,ENSP00000314214,ENSP00000411825,ENSP00000477590	CPNE3,PDCD6IP,TSG101,VAMP2
GO:0005515	protein binding	28	0.00074	ENSP00000204961,ENSP00000245323,ENSP00000251968,ENSP00000253794,ENSP00000261693,ENSP00000263645,ENSP00000263735,ENSP00000264039,ENSP00000297265,ENSP00000300574,ENSP00000314214,ENSP00000344456,ENSP00000354995,ENSP00000355778,ENSP00000357564,ENSP00000364801,ENSP00000367545,ENSP00000371958,ENSP00000375942,ENSP00000376345,ENSP00000376822,ENSP00000411825,ENSP00000441543,ENSP00000452780,ENSP00000473093…	ABCG1,B2M,CD81,CD9,CHMP4C,CPNE3,CRK,CTNNB1,EFNB1,EFNB2,EPCAM,GPC1,GRB2,H3F3A,HIST2H2AA3,HSPA1B,MAGEA3,PDCD6IP,RAB13,SCARB1,STEAP3,TBP,TP73,TPT1,TSG101,UBC,VAMP2,VPS25
GO:0004713	protein tyrosine kinase activity	5	0.002	ENSP00000204961,ENSP00000245323,ENSP00000351209,ENSP00000376345,ENSP00000381097	EFNB1,EFNB2,EPHA2,EPHB1,GRB2
GO:0004672	protein kinase activity	8	0.0022	ENSP00000204961,ENSP00000245323,ENSP00000263826,ENSP00000351209,ENSP00000376345,ENSP00000381097,ENSP00000399511,ENSP00000477590	AKT3,CPNE3,EFNB1,EFNB2,EPHA2,EPHB1,GRB2,TNIK
GO:0005488	binding	37	0.0032	ENSP00000204961,ENSP00000245323,ENSP00000251968,ENSP00000253794,ENSP00000261693,ENSP00000263645,ENSP00000263735,ENSP00000263826,ENSP00000264039,ENSP00000297265,ENSP00000300574,ENSP00000302961,ENSP00000314214,ENSP00000331901,ENSP00000344456,ENSP00000351209,ENSP00000354995,ENSP00000355778,ENSP00000357564,ENSP00000359380,ENSP00000364801,ENSP00000367545,ENSP00000367623,ENSP00000371958,ENSP00000375730…	ABCG1,AKT3,B2M,CD81,CD9,CHMP4C,CPNE3,CRK,CTNNB1,EEF1G,EFNB1,EFNB2,EPCAM,EPHA2,EPHB1,GPC1,GRB2,H3F3A,HIST2H2AA3,HSPA14,HSPA1B,HSPA4,MAGEA3,PDCD6IP,RAB13,RPL13A,SCARB1,SCD,STEAP3,TBP,TNIK,TP73,TPT1,TSG101,UBC,VAMP2,VPS25
GO:0005102	signaling receptor binding	11	0.0073	ENSP00000204961,ENSP00000245323,ENSP00000263645,ENSP00000300574,ENSP00000344456,ENSP00000364801,ENSP00000371958,ENSP00000375942,ENSP00000376345,ENSP00000411825,ENSP00000477590	CD81,CD9,CPNE3,CRK,CTNNB1,EFNB1,EFNB2,GRB2,HSPA1B,PDCD6IP,TBP
GO:0005003	ephrin receptor activity	2	0.0205	ENSP00000351209,ENSP00000381097	EPHA2,EPHB1
GO:0050839	cell adhesion molecule binding	4	0.0205	ENSP00000263645,ENSP00000263735,ENSP00000344456,ENSP00000371958	CD81,CD9,CTNNB1,EPCAM
GO:0045296	cadherin binding	2	0.0252	ENSP00000263735,ENSP00000344456	CTNNB1,EPCAM
GO:0046983	protein dimerization activity	9	0.0258	ENSP00000251968,ENSP00000253794,ENSP00000261693,ENSP00000297265,ENSP00000344456,ENSP00000354995,ENSP00000355778,ENSP00000411825,ENSP00000475814	ABCG1,CHMP4C,CTNNB1,H3F3A,HIST2H2AA3,PDCD6IP,SCARB1,TSG101,VPS25
GO:0019901	protein kinase binding	6	0.027	ENSP00000300574,ENSP00000344456,ENSP00000357564,ENSP00000367545,ENSP00000376345,ENSP00000477590	CPNE3,CRK,CTNNB1,GRB2,RAB13,TP73
GO:0001784	phosphotyrosine residue binding	2	0.047	ENSP00000300574,ENSP00000376345	CRK,GRB2
GO:0042802	identical protein binding	10	0.047	ENSP00000251968,ENSP00000253794,ENSP00000261693,ENSP00000297265,ENSP00000354995,ENSP00000367545,ENSP00000376345,ENSP00000376822,ENSP00000411825,ENSP00000452780	ABCG1,B2M,CHMP4C,GRB2,PDCD6IP,SCARB1,STEAP3,TP73,TSG101,VPS25
